# Supplementary material for: Genome-wide identification of long non-coding (lncRNA) in Nilaparvata lugens’s adaptability to resistant rice
Source: PeerJ. 2022 Jul 25;10:e13587. doi: 10.7717/peerj.13587 (PMC9332332; doi:10.7717/peerj.13587)
Supplement: Supplemental Information 3 [file peerj-10-13587-s003.xlsx]

## Sheet: Sheet1
Primer name	sequence (5'to3')
NlRPS11-qF	ATCGTGTGGCGTTGAAGG
NlRPS11-qR	TCCTGTTCCTCTGACGACTAC
ncbi_111058532-qF	GATGGACCGAAGAAGCAGAAG
ncbi_111058532-qR	GTGACAGCCTTGGAGACTTG
ncbi_111044590-qF	GCTGCTAACAATGCGAATGATT
ncbi_111044590-qR	GTGTGGCTTGCTCAGAAGAT
ncbi_111050469-qF	TTCTGATGATGGCGACTTAATACC
ncbi_111050469-qR	CCTGCTGCTTCACATAACCT
ncbi_111044383-qF	GTGAAGATGAACTAACAGGTGAG
ncbi_111044383-qR	CTCTTGACGACTTGCCACTT
ncbi_111053346-qF	CCAGGCAAGCCAGAGACT
ncbi_111053346-qR	CACCACCATAGCAGCAAGAATC
ncbi_120355484-qF	CCTGGCAATGAGACAATCACTAT
ncbi_120355484-qR	TTAAGGCTGGTCCAATCTGAATG
ncbi_111053362-qF	CGAACGGTAGATACTGAAGATGA
ncbi_111053362-qR	GGCTGCTTTGTCCATATTAGG
ncbi_120355505-qF	AACGGATTGAGGACGATAAGC
ncbi_120355505-qR	CATAGACGATGACATACGGATAAGAC
ncbi_111061470-qF	TCGTTGTGCCGTATAAGAGACT
ncbi_111061470-qR	AACATATCACTTCCGCCTCCT
MSTRG.26218-qF	TGCCGCCATCGTATTGTG
MSTRG.26218-qR	CCCTGAATTTACTCGCTCCTAC
MSTRG.7685.2-qF	CAGGAGACTTGTTGGATATTGGATT
MSTRG.7685.2-qR	CGACACTACACAACGCAGAA
MSTRG.12888.1-qF	TACCGAATACAACGAGTGGAGAA
MSTRG.12888.1-qR	AGATGGCGTGCTGTCAAC
MSTRG.18697.1-qF	ATGGAGGGAGAAGACCGTATG
MSTRG.18697.1-qR	TGAGACACTTATCACAGCATCCT
MSTRG.26118.1-qF	ACGAACGGTAGACAGTGAAGA
MSTRG.26118.1-qR	GCTGACTATCCTGAATGCGATT
MSTRG.26118.2 -qF	CCTGTTAGCAGCGTCAGTTAA
MSTRG.26118.2 -qR	GTTATCGGGTCGGGAATTATCG
MSTRG.26199.1-qF	GTGTTTGTTCATTATTCTGCGATTC
MSTRG.26199.1-qR	GCTATTACATTAGTTGCCGAAGGT
MSTRG.26220.1-qF	CGCTCGTAATGTCGTCAGTATG
MSTRG.26220.1-qR	GCAACACTAGGCATCTACATCAAT
XR_005571984.1-qF	AGTGGAAGTGATAGCGAAGAATC
XR_005571984.1-qR	CAAGTTGCGTTCAATCTGGTAG
XR_005573531.1-qF	GCCTATTGATGAAGAACTTGAGAG
XR_005573531.1-qR	CAGACACTCCAGGTACTCCAG
XR_005573932.1-qF	GGTTATGTCGGGTCCTTTGTT
XR_005573932.1-qR	ACGCTCCTTGTAACTTGTCTAC
