# Supplementary material for: Genome-wide identification of long non-coding (lncRNA) in Nilaparvata lugens’s adaptability to resistant rice
Source: PeerJ. 2022 Jul 25;10:e13587. doi: 10.7717/peerj.13587 (PMC9332332; doi:10.7717/peerj.13587)
Supplement: Supplemental Information 4 [file peerj-10-13587-s004.xlsx]

## Sheet: Sheet1
sample	exon	intron	intergenic
TN1-1	35674385 (60.77%)	11303943 (19.26%)	11726902 (19.98%)
TN1-2	28484849 (59.28%)	9240643 (19.23%)	10324444 (21.49%)
TN1-3	31976197 (58.47%)	11575341 (21.17%)	11132498 (20.36%)
YHY15-1	34442600 (61.35%)	11047315 (19.68%)	10649616 (18.97%)
YHY15-2	24165784 (68.55%)	5831446 (16.54%)	5253449 (14.90%)
YHY15-3	34542677 (59.99%)	11508268 (19.99%)	11526937 (20.02%)
