# Supplementary material for: Genome-wide identification of long non-coding (lncRNA) in Nilaparvata lugens’s adaptability to resistant rice
Source: PeerJ. 2022 Jul 25;10:e13587. doi: 10.7717/peerj.13587 (PMC9332332; doi:10.7717/peerj.13587)
Supplement: Supplemental Information 8 [file peerj-10-13587-s008.xlsx]

## Sheet: Sheet1
GeneID	Gene_Symbol	Gene_Description	KEGG_A_class	KEGG_B_class	Pathway	K_ID	GO Component	GO Function	GO Process
MSTRG.1110	--	hypothetical protein LSTR_LSTR001578 [Laodelphax striatellus]	-	-	-	-	-	-	-
MSTRG.14771	--	-	-	-	-	-	-	-	-
MSTRG.15430	--	tudor domain-containing protein 5-like isoform X2 [Cryptotermes secundus]	-	-	-	-	-	-	-
MSTRG.19141	--	Phospholipase A2 isozymes PA3A/PA3B/PA5 [Apis cerana cerana]	-	-	-	-	-	-	-
MSTRG.20211	--	hypothetical protein LSTR_LSTR005805 [Laodelphax striatellus]	-	-	-	-	-	-	-
MSTRG.20348	--	cuticular protein [Nilaparvata lugens]	-	-	-	-	-	-	-
MSTRG.26197	padC	phenolic acid decarboxylase [Gregarina niphandrodes]	-	-	-	-	-	-	-
MSTRG.26218	hupA	Y2 Tnp domain containing protein [Trichuris trichiura]	-	-	-	-	-	-	-
MSTRG.26861	insK	insO2 [Trichonephila clavipes]	-	-	-	-	-	-	-
MSTRG.447	--	hypothetical protein LSTR_LSTR008314 [Laodelphax striatellus]	-	-	-	-	-	-	-
MSTRG.5470	--	hypothetical protein LSTR_LSTR008263 [Laodelphax striatellus]	-	-	-	-	-	-	-
ncbi_111043287	PPAF3	easter-14 [Nilaparvata lugens]	-	-	-	-	-	-	-
ncbi_111043308	abcC12	ABC transporter C family member 12-like isoform X1 [Nilaparvata lugens]	Environmental Information Processing;Human Diseases	Membrane transport;Drug resistance	ko02010//ABC transporters;ko01523//Antifolate resistance	K05668;K05668	-	GO:0003824//catalytic activity	-
ncbi_111043313	--	uncharacterized protein LOC111043313 [Nilaparvata lugens]	-	-	-	-	-	-	-
ncbi_111043427	--	uncharacterized protein LOC111043427 [Nilaparvata lugens]	-	-	-	-	-	-	-
ncbi_111043519	--	collagen alpha-2(I) chain [Halyomorpha halys]	-	-	-	-	-	-	-
ncbi_111043532	ttc25	tetratricopeptide repeat protein 25-like [Nilaparvata lugens]	-	-	-	-	-	-	-
ncbi_111043545	--	stabilizer of axonemal microtubules 2-like isoform X2 [Cimex lectularius]	Metabolism;Environmental Information Processing;Metabolism	Global and overview maps;Signal transduction;Carbohydrate metabolism	ko01100//Metabolic pathways;ko04070//Phosphatidylinositol signaling system;ko00562//Inositol phosphate metabolism	K13711;K13711;K13711	-	-	-
ncbi_111043556	fdl	beta-N-acetylhexosaminidase [Nilaparvata lugens]	Metabolism;Cellular Processes;Metabolism;Metabolism;Metabolism;Metabolism;Metabolism;Metabolism	Global and overview maps;Transport and catabolism;Carbohydrate metabolism;Glycan biosynthesis and metabolism;Glycan biosynthesis and metabolism;Glycan biosynthesis and metabolism;Glycan biosynthesis and metabolism;Glycan biosynthesis and metabolism	ko01100//Metabolic pathways;ko04142//Lysosome;ko00520//Amino sugar and nucleotide sugar metabolism;ko00513//Various types of N-glycan biosynthesis;ko00511//Other glycan degradation;ko00531//Glycosaminoglycan degradation;ko00603//Glycosphingolipid biosynthesis - globo and isoglobo series;ko00604//Glycosphingolipid biosynthesis - ganglio series	K12373;K12373;K12373;K12373;K12373;K12373;K12373;K12373	GO:0016020//membrane	GO:0004563//beta-N-acetylhexosaminidase activity	GO:0006464//cellular protein modification process;GO:0006726//eye pigment biosynthetic process;GO:0009311//oligosaccharide metabolic process
ncbi_111043593	--	natural resistance-associated macrophage protein 2 homolog isoform X2 [Harpegnathos saltator]	-	-	-	-	-	-	-
ncbi_111043596	--	zinc finger CCCH domain-containing protein 17 [Nilaparvata lugens]	-	-	-	-	-	-	-
ncbi_111043673	ooc-5	torsin-1A-like isoform X1 [Nilaparvata lugens]	-	-	-	-	-	-	-
ncbi_111043678	Mkp3	dual specificity protein phosphatase Mpk3 [Nilaparvata lugens]	Environmental Information Processing;Organismal Systems	Signal transduction;Development and regeneration	ko04010//MAPK signaling pathway;ko04361//Axon regeneration	K04459;K04459	-	-	-
ncbi_111043697	--	J domain-containing protein DDB_G0295729 isoform X1 [Apis cerana]	-	-	-	-	-	-	-
ncbi_111043705	Tmtc1	transmembrane and TPR repeat-containing protein 1-like [Nilaparvata lugens]	-	-	-	-	-	-	-
ncbi_111043712	LST	estrogen sulfotransferase, testis isoform-like isoform X1 [Nilaparvata lugens]	-	-	-	-	-	-	-
ncbi_111043797	PKLR	pyruvate kinase-like [Nilaparvata lugens]	Metabolism;Human Diseases;Metabolism;Human Diseases;Metabolism;Metabolism;Metabolism;Organismal Systems;Human Diseases;Metabolism;Human Diseases	Global and overview maps;Infectious diseases;Global and overview maps;Cancers;Nucleotide metabolism;Global and overview maps;Carbohydrate metabolism;Endocrine system;Cancers;Carbohydrate metabolism;Endocrine and metabolic diseases	ko01100//Metabolic pathways;ko05165//Human papillomavirus infection;ko01200//Carbon metabolism;ko05203//Viral carcinogenesis;ko00230//Purine metabolism;ko01230//Biosynthesis of amino acids;ko00010//Glycolysis / Gluconeogenesis;ko04922//Glucagon signaling pathway;ko05230//Central carbon metabolism in cancer;ko00620//Pyruvate metabolism;ko04930//Type II diabetes mellitus	K00873;K00873;K00873;K00873;K00873;K00873;K00873;K00873;K00873;K00873;K00873	-	GO:0003824//catalytic activity	-
ncbi_111043803	MARCHF6	E3 ubiquitin-protein ligase MARCH2 [Athalia rosae]	-	-	-	-	-	-	-
ncbi_111043853	--	protein phosphatase 1 regulatory subunit 42-like [Nilaparvata lugens]	-	-	-	-	-	-	-
ncbi_111043950	SLC35A2	UDP-galactose translocator-like isoform X1 [Nilaparvata lugens]	-	-	-	-	GO:0031224//intrinsic component of membrane;GO:0031985//Golgi cisterna	GO:0005402//cation:sugar symporter activity;GO:0008514//organic anion transmembrane transporter activity;GO:0015165//pyrimidine nucleotide-sugar transmembrane transporter activity	GO:0006818//hydrogen transport;GO:0006862//nucleotide transport;GO:0008645//hexose transport;GO:0015711//organic anion transport
ncbi_111043964	--	charged multivesicular body protein 1b-like [Nilaparvata lugens]	-	-	-	-	-	-	-
ncbi_111044034	--	PREDICTED: protein takeout-like [Bemisia tabaci]	-	-	-	-	-	-	-
ncbi_111044100	--	calponin homology domain-containing protein DDB_G0272472 [Nilaparvata lugens]	-	-	-	-	-	-	-
ncbi_111044180	Arsb	arylsulfatase B-like [Zootermopsis nevadensis]	Metabolism;Cellular Processes;Metabolism	Global and overview maps;Transport and catabolism;Glycan biosynthesis and metabolism	ko01100//Metabolic pathways;ko04142//Lysosome;ko00531//Glycosaminoglycan degradation	K01135;K01135;K01135	-	GO:0016788//hydrolase activity, acting on ester bonds	-
ncbi_111044214	Cdlc2	dynein light chain 2, cytoplasmic-like [Nilaparvata lugens]	Human Diseases;Organismal Systems	Infectious diseases;Excretory system	ko05132//Salmonella infection;ko04962//Vasopressin-regulated water reabsorption	K10418;K10418	GO:0005815//microtubule organizing center;GO:0015629//actin cytoskeleton;GO:0016020//membrane;GO:0030286//dynein complex;GO:0043231//intracellular membrane-bounded organelle;GO:0044441//ciliary part;GO:0044444//cytoplasmic part	GO:0005515//protein binding;GO:0016887//ATPase activity	GO:0002478//antigen processing and presentation of exogenous peptide antigen;GO:0007017//microtubule-based process;GO:0008038//neuron recognition;GO:0035556//intracellular signal transduction;GO:1900739//regulation of protein insertion into mitochondrial membrane involved in apoptotic signaling pathway
ncbi_111044232	egh	beta-1,4-mannosyltransferase egh [Nilaparvata lugens]	Organismal Systems	Development	ko04320//Dorso-ventral axis formation	K02359	GO:0016021//integral component of membrane	GO:0000030//mannosyltransferase activity	GO:0001743//optic placode formation;GO:0002066//columnar/cuboidal epithelial cell development;GO:0007281//germ cell development;GO:0007619//courtship behavior;GO:0007621//negative regulation of female receptivity;GO:0016334//establishment or maintenance of polarity of follicular epithelium;GO:0043900//regulation of multi-organism process;GO:0044765//single-organism transport;GO:0051674//localizat…
ncbi_111044264	AAEL008004	elongation of very long chain fatty acids protein 7 [Nilaparvata lugens]	Metabolism;Metabolism;Metabolism;Metabolism	Global and overview maps;Global and overview maps;Lipid metabolism;Lipid metabolism	ko01100//Metabolic pathways;ko01212//Fatty acid metabolism;ko01040//Biosynthesis of unsaturated fatty acids;ko00062//Fatty acid elongation	K10250;K10250;K10250;K10250	GO:0031224//intrinsic component of membrane	GO:0004312//fatty acid synthase activity	GO:0006633//fatty acid biosynthetic process
ncbi_111044266	Ac78C	adenylate cyclase type 8-like, partial [Nilaparvata lugens]	Metabolism;Human Diseases;Organismal Systems;Environmental Information Processing;Human Diseases;Metabolism;Human Diseases;Organismal Systems;Human Diseases;Environmental Information Processing;Organismal Systems;Environmental Information Processing;Environmental Information Processing;Organismal Systems;Organismal Systems;Cellular Processes;Organismal Systems;Organismal Systems;Environmental Inf…	Global and overview maps;Cancers;Environmental adaptation;Signal transduction;Infectious diseases;Nucleotide metabolism;Infectious diseases;Digestive system;Endocrine and metabolic diseases;Signal transduction;Nervous system;Signal transduction;Signal transduction;Endocrine system;Circulatory system;Cell growth and death;Circulatory system;Endocrine system;Signal transduction;Signal transduction;…	ko01100//Metabolic pathways;ko05200//Pathways in cancer;ko04714//Thermogenesis;ko04024//cAMP signaling pathway;ko05166//HTLV-I infection;ko00230//Purine metabolism;ko05163//Human cytomegalovirus infection;ko04972//Pancreatic secretion;ko04934//Cushing syndrome;ko04020//Calcium signaling pathway;ko04723//Retrograde endocannabinoid signaling;ko04015//Rap1 signaling pathway;ko04022//cGMP - PKG signa…	K08048;K08048;K08048;K08048;K08048;K08048;K08048;K08048;K08048;K08048;K08048;K08048;K08048;K08048;K08048;K08048;K08048;K08048;K08048;K08048;K08048;K08048;K08048;K08048;K08048;K08048;K08048;K08048;K08048;K08048;K08048;K08048;K08048;K08048;K08048;K08048;K08048;K08048;K08048;K08048;K08048;K08048;K08048;K08048;K08048;K08048;K08048;K08048;K08048;K08048	-	GO:0016829//lyase activity	GO:0044763//single-organism cellular process
ncbi_111044309	NLK	nemo-like protein [Nilaparvata lugens]	Environmental Information Processing;Environmental Information Processing;Environmental Information Processing;Cellular Processes	Signal transduction;Signal transduction;Signal transduction;Cellular community - eukaryotes	ko04010//MAPK signaling pathway;ko04310//Wnt signaling pathway;ko04068//FoxO signaling pathway;ko04520//Adherens junction	K04468;K04468;K04468;K04468	-	GO:0004702//receptor signaling protein serine/threonine kinase activity;GO:0032550//purine ribonucleoside binding	GO:0001738//morphogenesis of a polarized epithelium;GO:0003002//regionalization;GO:0006464//cellular protein modification process;GO:0006796//phosphate-containing compound metabolic process;GO:0008582//regulation of synaptic growth at neuromuscular junction;GO:0009629//response to gravity;GO:0009886//post-embryonic morphogenesis;GO:0009968//negative regulation of signal transduction;GO:0035114//i…
ncbi_111044381	--	uncharacterized protein LOC111044381 isoform X1 [Nilaparvata lugens]	-	-	-	-	-	-	-
ncbi_111044383	--	uncharacterized protein LOC111044383 [Nilaparvata lugens]	-	-	-	-	-	-	-
ncbi_111044422	Cox6a1	cytochrome c oxidase subunit 6A, mitochondrial-like [Nilaparvata lugens]	Metabolism;Human Diseases;Human Diseases;Organismal Systems;Human Diseases;Metabolism;Human Diseases;Organismal Systems	Global and overview maps;Neurodegenerative diseases;Neurodegenerative diseases;Environmental adaptation;Neurodegenerative diseases;Energy metabolism;Endocrine and metabolic diseases;Circulatory system	ko01100//Metabolic pathways;ko05016//Huntington disease;ko05010//Alzheimer disease;ko04714//Thermogenesis;ko05012//Parkinson disease;ko00190//Oxidative phosphorylation;ko04932//Non-alcoholic fatty liver disease (NAFLD);ko04260//Cardiac muscle contraction	K02266;K02266;K02266;K02266;K02266;K02266;K02266;K02266	GO:0005739//mitochondrion;GO:0019866//organelle inner membrane;GO:0043234//protein complex;GO:0044425//membrane part	-	GO:0006091//generation of precursor metabolites and energy;GO:0010467//gene expression;GO:0044710//single-organism metabolic process;GO:0044763//single-organism cellular process
ncbi_111044455	CCDC40	coiled-coil domain-containing protein 40 [Nilaparvata lugens]	-	-	-	-	-	-	GO:0007275//multicellular organism development
ncbi_111044492	--	E3 ubiquitin-protein ligase TRAIP-like [Nilaparvata lugens]	-	-	-	-	-	GO:0019899//enzyme binding	GO:0044763//single-organism cellular process
ncbi_111044586	CABLES1	CDK5 and ABL1 enzyme substrate 2 [Nilaparvata lugens]	-	-	-	-	-	-	-
ncbi_111044590	Dus4l	tRNA-dihydrouridine(20a/20b) synthase [NAD(P)+]-like isoform X1 [Nilaparvata lugens]	-	-	-	-	-	GO:0016628//oxidoreductase activity, acting on the CH-CH group of donors, NAD or NADP as acceptor	GO:0008152//metabolic process
ncbi_111044684	--	steroidogenic acute regulatory protein, mitochondrial-like isoform X1 [Nilaparvata lugens]	Organismal Systems	Digestive system	ko04979//Cholesterol metabolism	K22291	-	-	GO:0044699//single-organism process
ncbi_111044686	tmem179	transmembrane protein 179-like [Nilaparvata lugens]	-	-	-	-	-	-	-
ncbi_111044689	Tssk2	testis-specific serine/threonine-protein kinase 3 [Nilaparvata lugens]	-	-	-	-	-	GO:0004674//protein serine/threonine kinase activity;GO:0032550//purine ribonucleoside binding	GO:0006464//cellular protein modification process;GO:0006796//phosphate-containing compound metabolic process
ncbi_111044690	hfp	poly(U)-binding-splicing factor half pint [Nilaparvata lugens]	Genetic Information Processing	Transcription	ko03040//Spliceosome	K12838	GO:0033176//proton-transporting V-type ATPase complex	GO:0022857//transmembrane transporter activity;GO:0097159//organic cyclic compound binding	GO:0044763//single-organism cellular process
ncbi_111044817	ANKRD12	ankyrin repeat domain-containing protein 12-like, partial [Nilaparvata lugens]	-	-	-	-	-	-	-
ncbi_111044840	--	1-phosphatidylinositol 4,5-bisphosphate phosphodiesterase gamma-1-like, partial [Nilaparvata lugens]	-	-	-	-	-	-	-
ncbi_111044861	--	uncharacterized protein LOC111044861 [Nilaparvata lugens]	-	-	-	-	-	-	-
ncbi_111044863	wat	fatty acyl-CoA reductase [Nilaparvata lugens]	Cellular Processes;Organismal Systems	Transport and catabolism;Aging	ko04146//Peroxisome;ko04212//Longevity regulating pathway - worm	K13356;K13356	-	-	-
ncbi_111044869	--	DUF4485 domain-containing protein [Aphis craccivora]	-	-	-	-	-	-	-
ncbi_111044875	OVCH1	chymotrypsin-like elastase family member 2A [Nilaparvata lugens]	-	-	-	-	-	GO:0070011//peptidase activity, acting on L-amino acid peptides	-
ncbi_111045022	ema	protein CLEC16A homolog [Nilaparvata lugens]	-	-	-	-	-	-	-
ncbi_111045030	--	modular serine protease-like [Nilaparvata lugens]	-	-	-	-	-	-	-
ncbi_111045055	Gld	glucose dehydrogenase [FAD, quinone]-like [Nilaparvata lugens]	Metabolism;Metabolism	Global and overview maps;Carbohydrate metabolism	ko01100//Metabolic pathways;ko00030//Pentose phosphate pathway	K00115;K00115	GO:0030312//external encapsulating structure	GO:0016491//oxidoreductase activity	GO:0044710//single-organism metabolic process;GO:0071704//organic substance metabolic process
ncbi_111045056	Gld	glucose dehydrogenase [FAD, quinone]-like [Nilaparvata lugens]	Metabolism;Metabolism	Global and overview maps;Carbohydrate metabolism	ko01100//Metabolic pathways;ko00030//Pentose phosphate pathway	K00115;K00115	-	GO:0016614//oxidoreductase activity, acting on CH-OH group of donors	GO:0035209//pupal development;GO:0046692//sperm competition
ncbi_111045060	--	UBX domain-containing protein 4-like [Nilaparvata lugens]	-	-	-	-	GO:0043231//intracellular membrane-bounded organelle	-	-
ncbi_111045197	SLC46A3	proton-coupled folate transporter-like [Nilaparvata lugens]	-	-	-	-	-	-	-
ncbi_111045247	UBE2L3	ubiquitin-conjugating enzyme E2I-like [Acyrthosiphon pisum]	Human Diseases;Genetic Information Processing	Neurodegenerative diseases;Folding, sorting and degradation	ko05012//Parkinson disease;ko04120//Ubiquitin mediated proteolysis	K04552;K04552	GO:0031988//membrane-bounded vesicle;GO:0043231//intracellular membrane-bounded organelle	GO:0003712//transcription cofactor activity;GO:0003723//RNA binding;GO:0004842//ubiquitin-protein transferase activity;GO:0036094//small molecule binding;GO:0044389//ubiquitin-like protein ligase binding;GO:0055106//ubiquitin-protein transferase regulator activity	GO:0000209//protein polyubiquitination;GO:0010468//regulation of gene expression;GO:0010822//positive regulation of mitochondrion organization;GO:0019941//modification-dependent protein catabolic process;GO:0022402//cell cycle process;GO:0031398//positive regulation of protein ubiquitination;GO:0032870//cellular response to hormone stimulus;GO:0034645//cellular macromolecule biosynthetic process;…
ncbi_111045303	--	defensin-like [Nilaparvata lugens]	Organismal Systems	Immune system	ko04624//Toll and Imd signaling pathway	K20668	GO:0005576//extracellular region	-	GO:0006955//immune response;GO:0042742//defense response to bacterium
ncbi_111045397	abcG23	ABC transporter G family member 23 isoform X1 [Nilaparvata lugens]	-	-	-	-	-	GO:0019829//cation-transporting ATPase activity;GO:0032550//purine ribonucleoside binding	GO:0006826//iron ion transport
ncbi_111045417	ppp1cc-a	serine/threonine-protein phosphatase alpha-2 isoform-like [Nilaparvata lugens]	Environmental Information Processing;Human Diseases;Human Diseases;Human Diseases;Cellular Processes;Organismal Systems;Cellular Processes;Environmental Information Processing;Cellular Processes;Organismal Systems;Organismal Systems;Cellular Processes;Organismal Systems;Environmental Information Processing;Organismal Systems;Genetic Information Processing;Organismal Systems;Human Diseases;Organis…	Signal transduction;Substance dependence;Infectious diseases;Cancers;Cell motility;Endocrine system;Cellular community - eukaryotes;Signal transduction;Cell growth and death;Endocrine system;Circulatory system;Cell growth and death;Circulatory system;Signal transduction;Nervous system;Translation;Sensory system;Endocrine and metabolic diseases;Immune system;Substance dependence;Nervous system	ko04024//cAMP signaling pathway;ko05034//Alcoholism;ko05168//Herpes simplex infection;ko05205//Proteoglycans in cancer;ko04810//Regulation of actin cytoskeleton;ko04910//Insulin signaling pathway;ko04510//Focal adhesion;ko04022//cGMP - PKG signaling pathway;ko04218//Cellular senescence;ko04921//Oxytocin signaling pathway;ko04270//Vascular smooth muscle contraction;ko04114//Oocyte meiosis;ko04261/…	K06269;K06269;K06269;K06269;K06269;K06269;K06269;K06269;K06269;K06269;K06269;K06269;K06269;K06269;K06269;K06269;K06269;K06269;K06269;K06269;K06269	GO:0000776//kinetochore;GO:0005924//cell-substrate adherens junction;GO:0008287//protein serine/threonine phosphatase complex;GO:0016604//nuclear body;GO:0031966//mitochondrial membrane;GO:0032155//cell division site part;GO:0035097//histone methyltransferase complex;GO:0044309//neuron spine	GO:0003723//RNA binding;GO:0004721//phosphoprotein phosphatase activity;GO:0019900//kinase binding;GO:0043169//cation binding	GO:0000087//mitotic M phase;GO:0000278//mitotic cell cycle;GO:0006073//cellular glucan metabolic process;GO:0006464//cellular protein modification process;GO:0006641//triglyceride metabolic process;GO:0006796//phosphate-containing compound metabolic process;GO:0006913//nucleocytoplasmic transport;GO:0007623//circadian rhythm;GO:0009648//photoperiodism;GO:0017015//regulation of transforming growth…
ncbi_111045419	--	uncharacterized protein LOC111045419 [Nilaparvata lugens]	-	-	-	-	-	-	-
ncbi_111045434	--	AGAP004888-PA-like protein [Anopheles sinensis]	-	-	-	-	-	-	-
ncbi_111045443	WDR63	WD40/YVTN repeat-like-containing domain,WD40 repeat, conserved site,WD40 repeat,WD40-repeat-containing [Cinara cedri]	-	-	-	-	-	-	-
ncbi_111045476	adgrg6	cadherin EGF LAG seven-pass G-type receptor 1-like [Nilaparvata lugens]	-	-	-	-	GO:0005578//proteinaceous extracellular matrix	-	GO:0007166//cell surface receptor signaling pathway
ncbi_111045500	TKDP1	PI-actitoxin-Axm2b-like [Nilaparvata lugens]	-	-	-	-	-	-	GO:0048731//system development;GO:0065007//biological regulation
ncbi_111045504	TKDP1	PI-actitoxin-Axm2b-like [Nilaparvata lugens]	-	-	-	-	-	-	GO:0048731//system development;GO:0065007//biological regulation
ncbi_111045609	--	uncharacterized protein LOC111045609 [Nilaparvata lugens]	-	-	-	-	-	-	-
ncbi_111045698	PRKACB	cAMP-dependent protein kinase catalytic subunit-like [Cimex lectularius]	Human Diseases;Organismal Systems;Human Diseases;Environmental Information Processing;Environmental Information Processing;Human Diseases;Human Diseases;Human Diseases;Human Diseases;Cellular Processes;Human Diseases;Human Diseases;Environmental Information Processing;Human Diseases;Environmental Information Processing;Environmental Information Processing;Organismal Systems;Organismal Systems;Org…	Cancers;Environmental adaptation;Infectious diseases;Signal transduction;Signal transduction;Substance dependence;Cancers;Neurodegenerative diseases;Infectious diseases;Transport and catabolism;Cancers;Infectious diseases;Signal transduction;Endocrine and metabolic diseases;Signal transduction;Signal transduction;Endocrine system;Nervous system;Development and regeneration;Endocrine system;Cellul…	ko05200//Pathways in cancer;ko04714//Thermogenesis;ko05165//Human papillomavirus infection;ko04024//cAMP signaling pathway;ko04010//MAPK signaling pathway;ko05034//Alcoholism;ko05203//Viral carcinogenesis;ko05012//Parkinson disease;ko05166//HTLV-I infection;ko04140//Autophagy - animal;ko05205//Proteoglycans in cancer;ko05163//Human cytomegalovirus infection;ko04014//Ras signaling pathway;ko04934/…	K04345;K04345;K04345;K04345;K04345;K04345;K04345;K04345;K04345;K04345;K04345;K04345;K04345;K04345;K04345;K04345;K04345;K04345;K04345;K04345;K04345;K04345;K04345;K04345;K04345;K04345;K04345;K04345;K04345;K04345;K04345;K04345;K04345;K04345;K04345;K04345;K04345;K04345;K04345;K04345;K04345;K04345;K04345;K04345;K04345;K04345;K04345;K04345;K04345;K04345;K04345;K04345;K04345;K04345;K04345;K04345;K04345;…	GO:0005815//microtubule organizing center;GO:0031981//nuclear lumen;GO:0031988//membrane-bounded vesicle;GO:0044441//ciliary part;GO:0044444//cytoplasmic part	GO:0004690//cyclic nucleotide-dependent protein kinase activity;GO:0032550//purine ribonucleoside binding;GO:0044389//ubiquitin-like protein ligase binding;GO:0046872//metal ion binding	GO:0002220//innate immune response activating cell surface receptor signaling pathway;GO:0003014//renal system process;GO:0006006//glucose metabolic process;GO:0006641//triglyceride metabolic process;GO:0007187//G-protein coupled receptor signaling pathway, coupled to cyclic nucleotide second messenger;GO:0007267//cell-cell signaling;GO:0007599//hemostasis;GO:0010646//regulation of cell communica…
ncbi_111045729	--	centromere-associated protein E-like [Nilaparvata lugens]	-	-	-	-	-	-	-
ncbi_111045732	Slc5a12	sodium-coupled monocarboxylate transporter 2-like [Nilaparvata lugens]	Human Diseases	Cancers	ko05206//MicroRNAs in cancer	K17391	GO:0016020//membrane	-	GO:0051234//establishment of localization
ncbi_111045767	--	cold and drought-regulated protein CORA-like isoform X1 [Nilaparvata lugens]	-	-	-	-	-	-	-
ncbi_111045884	USP2	ubiquitin carboxyl-terminal hydrolase 2-like [Nilaparvata lugens]	-	-	-	-	GO:0005737//cytoplasm	GO:0005515//protein binding;GO:0008233//peptidase activity	GO:0006508//proteolysis;GO:0009987//cellular process
ncbi_111045962	TIMM23	mitochondrial import inner membrane translocase subunit Tim23-like isoform X1 [Nilaparvata lugens]	Organismal Systems	Aging	ko04212//Longevity regulating pathway - worm	K17794	GO:0031224//intrinsic component of membrane	-	-
ncbi_111045966	--	retinol-binding protein pinta-like [Nilaparvata lugens]	-	-	-	-	-	-	-
ncbi_111045973	TTPAL	alpha-tocopherol transfer protein-like isoform X1 [Nilaparvata lugens]	-	-	-	-	-	-	-
ncbi_111046033	--	GATA zinc finger domain-containing protein 14-like [Nilaparvata lugens]	-	-	-	-	-	-	-
ncbi_111046103	TXN	thioredoxin-like [Nilaparvata lugens]	Human Diseases;Human Diseases;Organismal Systems	Infectious diseases;Cardiovascular diseases;Immune system	ko05132//Salmonella infection;ko05418//Fluid shear stress and atherosclerosis;ko04621//NOD-like receptor signaling pathway	K03671;K03671;K03671	-	-	-
ncbi_111046108	ck	LOW QUALITY PROTEIN: myosin-VIIa [Nilaparvata lugens]	-	-	-	-	GO:0015629//actin cytoskeleton	GO:0017111//nucleoside-triphosphatase activity;GO:0032550//purine ribonucleoside binding	GO:0050794//regulation of cellular process
ncbi_111046119	Trim9	E3 ubiquitin-protein ligase TRIM9-like [Nilaparvata lugens]	-	-	-	-	-	GO:0046872//metal ion binding	-
ncbi_111046152	--	coiled-coil domain-containing protein 13-like [Nilaparvata lugens]	-	-	-	-	-	-	-
ncbi_111046157	Tret1	facilitated trehalose transporter Tret1-like [Nilaparvata lugens]	-	-	-	-	GO:0016020//membrane	GO:0022857//transmembrane transporter activity	GO:0044763//single-organism cellular process;GO:0044765//single-organism transport;GO:0050789//regulation of biological process
ncbi_111046227	MYSM1	histone H2A deubiquitinase MYSM1-like [Frankliniella occidentalis]	-	-	-	-	GO:0005856//cytoskeleton;GO:0031981//nuclear lumen	GO:0003712//transcription cofactor activity;GO:0005515//protein binding;GO:0036459//thiol-dependent ubiquitinyl hydrolase activity;GO:0070011//peptidase activity, acting on L-amino acid peptides	GO:0006357//regulation of transcription from RNA polymerase II promoter;GO:0016477//cell migration;GO:0035521//monoubiquitinated histone deubiquitination;GO:0042634//regulation of hair cycle
ncbi_111046285	TMEM131	transmembrane protein 131 [Nilaparvata lugens]	-	-	-	-	-	-	-
ncbi_111046290	AMMECR1L	AMMECR1-like protein [Nilaparvata lugens]	-	-	-	-	-	-	-
ncbi_111046317	--	leucine-rich repeat-containing protein 40-like [Nilaparvata lugens]	-	-	-	-	-	-	-
ncbi_111046320	Rrp1	DNA-(apurinic or apyrimidinic site) lyase-like [Frankliniella occidentalis]	Genetic Information Processing	Replication and repair	ko03410//Base excision repair	K10771	-	GO:0004519//endonuclease activity;GO:0005488//binding	GO:0090304//nucleic acid metabolic process
ncbi_111046329	Cyp6a20	cytochrome P450 CYP6AX1v2 [Nilaparvata lugens]	-	-	-	-	-	GO:0003824//catalytic activity	-
ncbi_111046331	--	zinc finger CCCH domain-containing protein 18-like [Nilaparvata lugens]	-	-	-	-	-	-	-
ncbi_111046377	MYCBP	C-Myc-binding protein homolog [Nilaparvata lugens]	-	-	-	-	-	-	-
ncbi_111046387	--	uncharacterized protein LOC111046387 [Nilaparvata lugens]	-	-	-	-	-	-	-
ncbi_111046398	tiprl	TIP41-like protein [Nilaparvata lugens]	-	-	-	-	-	-	-
ncbi_111046415	mAChR-A	muscarinic acetylcholine receptor DM1-like [Nilaparvata lugens]	Human Diseases;Environmental Information Processing;Organismal Systems;Environmental Information Processing;Cellular Processes;Organismal Systems;Organismal Systems;Organismal Systems;Organismal Systems;Organismal Systems	Neurodegenerative diseases;Signaling molecules and interaction;Digestive system;Signal transduction;Cell motility;Nervous system;Digestive system;Endocrine system;Digestive system;Sensory system	ko05010//Alzheimer disease;ko04080//Neuroactive ligand-receptor interaction;ko04972//Pancreatic secretion;ko04020//Calcium signaling pathway;ko04810//Regulation of actin cytoskeleton;ko04725//Cholinergic synapse;ko04970//Salivary secretion;ko04911//Insulin secretion;ko04971//Gastric acid secretion;ko04742//Taste transduction	K04131;K04131;K04131;K04131;K04131;K04131;K04131;K04131;K04131;K04131	GO:0016021//integral component of membrane	GO:0004930//G-protein coupled receptor activity	GO:0007186//G-protein coupled receptor signaling pathway;GO:0044267//cellular protein metabolic process
ncbi_111046480	IQCK	IQ domain-containing protein K-like [Nilaparvata lugens]	-	-	-	-	-	-	-
ncbi_111046503	--	AGAP002072-PA [Anopheles gambiae str. PEST] [Anopheles gambiae]	-	-	-	-	-	-	-
ncbi_111046523	Slc9a3r2	AGAP002322-PA [Anopheles gambiae str. PEST] [Anopheles gambiae]	-	-	-	-	-	GO:0046872//metal ion binding	-
ncbi_111046569	anon-37Cs	protein anon-37Cs-like [Nilaparvata lugens]	Metabolism;Metabolism;Metabolism	Global and overview maps;Amino acid metabolism;Metabolism of other amino acids	ko01100//Metabolic pathways;ko00330//Arginine and proline metabolism;ko00410//beta-Alanine metabolism	K12259;K12259;K12259	-	-	-
ncbi_111046604	--	voltage-dependent anion-selective channel-like [Nilaparvata lugens]	Human Diseases;Human Diseases;Human Diseases;Human Diseases;Environmental Information Processing;Environmental Information Processing;Cellular Processes;Cellular Processes;Organismal Systems;Organismal Systems;Cellular Processes	Neurodegenerative diseases;Neurodegenerative diseases;Neurodegenerative diseases;Infectious diseases;Signal transduction;Signal transduction;Cell growth and death;Cell growth and death;Immune system;Digestive system;Cell growth and death	ko05016//Huntington disease;ko05010//Alzheimer disease;ko05012//Parkinson disease;ko05166//HTLV-I infection;ko04020//Calcium signaling pathway;ko04022//cGMP - PKG signaling pathway;ko04218//Cellular senescence;ko04217//Necroptosis;ko04621//NOD-like receptor signaling pathway;ko04979//Cholesterol metabolism;ko04216//Ferroptosis	K15040;K15040;K15040;K15040;K15040;K15040;K15040;K15040;K15040;K15040;K15040	GO:0016020//membrane;GO:0043232//intracellular non-membrane-bounded organelle;GO:0043234//protein complex;GO:0044429//mitochondrial part	GO:0005216//ion channel activity;GO:0005515//protein binding	GO:0006820//anion transport;GO:0007005//mitochondrion organization;GO:0007154//cell communication;GO:0032502//developmental process;GO:0044700//single organism signaling;GO:0050794//regulation of cellular process;GO:0050896//response to stimulus;GO:0055085//transmembrane transport
ncbi_111046632	Efcab2	EF-hand calcium-binding domain-containing protein 2-like [Nilaparvata lugens]	-	-	-	-	-	-	-
ncbi_111046646	ATP6V1E1	V-type proton ATPase subunit E-like [Nilaparvata lugens]	Metabolism;Human Diseases;Metabolism;Environmental Information Processing;Cellular Processes;Organismal Systems;Human Diseases;Human Diseases;Human Diseases;Organismal Systems	Global and overview maps;Infectious diseases;Energy metabolism;Signal transduction;Transport and catabolism;Nervous system;Infectious diseases;Infectious diseases;Immune diseases;Excretory system	ko01100//Metabolic pathways;ko05165//Human papillomavirus infection;ko00190//Oxidative phosphorylation;ko04150//mTOR signaling pathway;ko04145//Phagosome;ko04721//Synaptic vesicle cycle;ko05120//Epithelial cell signaling in Helicobacter pylori infection;ko05110//Vibrio cholerae infection;ko05323//Rheumatoid arthritis;ko04966//Collecting duct acid secretion	K02150;K02150;K02150;K02150;K02150;K02150;K02150;K02150;K02150;K02150	-	-	GO:0006810//transport
ncbi_111046667	T05H10.6	pyruvate dehydrogenase E1 component subunit alpha type II, mitochondrial-like [Nilaparvata lugens]	Metabolism;Metabolism;Environmental Information Processing;Metabolism;Organismal Systems;Metabolism;Human Diseases;Metabolism	Global and overview maps;Global and overview maps;Signal transduction;Carbohydrate metabolism;Endocrine system;Carbohydrate metabolism;Cancers;Carbohydrate metabolism	ko01100//Metabolic pathways;ko01200//Carbon metabolism;ko04066//HIF-1 signaling pathway;ko00010//Glycolysis / Gluconeogenesis;ko04922//Glucagon signaling pathway;ko00020//Citrate cycle (TCA cycle);ko05230//Central carbon metabolism in cancer;ko00620//Pyruvate metabolism	K00161;K00161;K00161;K00161;K00161;K00161;K00161;K00161	GO:0030529//intracellular ribonucleoprotein complex;GO:0043231//intracellular membrane-bounded organelle	GO:0016903//oxidoreductase activity, acting on the aldehyde or oxo group of donors	GO:0006090//pyruvate metabolic process;GO:0010467//gene expression
ncbi_111046681	SLC1A2	excitatory amino acid transporter isoform X1 [Nilaparvata lugens]	Human Diseases;Organismal Systems;Organismal Systems;Human Diseases	Neurodegenerative diseases;Nervous system;Nervous system;Neurodegenerative diseases	ko05016//Huntington disease;ko04721//Synaptic vesicle cycle;ko04724//Glutamatergic synapse;ko05014//Amyotrophic lateral sclerosis (ALS)	K05613;K05613;K05613;K05613	GO:0016020//membrane	GO:0005283//sodium:amino acid symporter activity;GO:0005310//dicarboxylic acid transmembrane transporter activity;GO:0015172//acidic amino acid transmembrane transporter activity;GO:0016772//transferase activity, transferring phosphorus-containing groups	GO:0009987//cellular process;GO:0044765//single-organism transport;GO:0071702//organic substance transport
ncbi_111046695	--	E3 ubiquitin-protein ligase MARCH2-like isoform X2 [Nilaparvata lugens]	-	-	-	-	-	-	-
ncbi_111046700	SNMP-1	scavenger receptor class B member 1-like [Nilaparvata lugens]	Human Diseases;Cellular Processes;Organismal Systems;Organismal Systems;Human Diseases;Organismal Systems;Organismal Systems;Organismal Systems;Organismal Systems;Organismal Systems	Endocrine and metabolic diseases;Transport and catabolism;Endocrine system;Digestive system;Infectious diseases;Digestive system;Endocrine system;Digestive system;Digestive system;Endocrine system	ko04934//Cushing syndrome;ko04145//Phagosome;ko04925//Aldosterone synthesis and secretion;ko04976//Bile secretion;ko05160//Hepatitis C;ko04975//Fat digestion and absorption;ko04927//Cortisol synthesis and secretion;ko04977//Vitamin digestion and absorption;ko04979//Cholesterol metabolism;ko04913//Ovarian Steroidogenesis	K13885;K13885;K13885;K13885;K13885;K13885;K13885;K13885;K13885;K13885	-	-	-
ncbi_111046729	ACADS	short-chain specific acyl-CoA dehydrogenase, mitochondrial-like isoform X1 [Nilaparvata lugens]	Metabolism;Metabolism;Metabolism;Metabolism;Metabolism;Metabolism;Metabolism;Metabolism	Global and overview maps;Global and overview maps;Global and overview maps;Amino acid metabolism;Carbohydrate metabolism;Lipid metabolism;Metabolism of other amino acids;Carbohydrate metabolism	ko01100//Metabolic pathways;ko01200//Carbon metabolism;ko01212//Fatty acid metabolism;ko00280//Valine, leucine and isoleucine degradation;ko00640//Propanoate metabolism;ko00071//Fatty acid degradation;ko00410//beta-Alanine metabolism;ko00650//Butanoate metabolism	K00248;K00248;K00248;K00248;K00248;K00248;K00248;K00248	GO:0043234//protein complex	GO:0000166//nucleotide binding;GO:0001076//transcription factor activity, RNA polymerase II transcription factor binding;GO:0016627//oxidoreductase activity, acting on the CH-CH group of donors	GO:0006352//DNA-templated transcription, initiation;GO:0044710//single-organism metabolic process;GO:0048812//neuron projection morphogenesis
ncbi_111046792	acsbg2	very long-chain-fatty-acid--CoA ligase bubblegum-like [Nilaparvata lugens]	Metabolism;Metabolism;Organismal Systems;Metabolism;Organismal Systems;Metabolism	Global and overview maps;Global and overview maps;Endocrine system;Lipid metabolism;Endocrine system;Lipid metabolism	ko01100//Metabolic pathways;ko01212//Fatty acid metabolism;ko03320//PPAR signaling pathway;ko00071//Fatty acid degradation;ko04920//Adipocytokine signaling pathway;ko00061//Fatty acid biosynthesis	K15013;K15013;K15013;K15013;K15013;K15013	-	-	-
ncbi_111046832	--	gastrula zinc finger protein XlCGF57.1-like [Nilaparvata lugens]	-	-	-	-	-	-	-
ncbi_111046864	--	protein starmaker-like isoform X1 [Nilaparvata lugens]	-	-	-	-	-	-	-
ncbi_111046868	--	tRNA selenocysteine 1-associated protein 1-like [Nilaparvata lugens]	-	-	-	-	-	-	-
ncbi_111046872	dnm1l	dynamin-1-like protein [Nilaparvata lugens]	Cellular Processes;Organismal Systems;Cellular Processes;Environmental Information Processing	Cell growth and death;Immune system;Cell growth and death;Signal transduction	ko04217//Necroptosis;ko04621//NOD-like receptor signaling pathway;ko04214//Apoptosis - fly;ko04668//TNF signaling pathway	K17065;K17065;K17065;K17065	GO:0043231//intracellular membrane-bounded organelle;GO:0044444//cytoplasmic part	GO:0005515//protein binding	GO:0006461//protein complex assembly;GO:0006915//apoptotic process;GO:0007005//mitochondrion organization;GO:0050794//regulation of cellular process;GO:0061024//membrane organization
ncbi_111046873	--	CKLF-like MARVEL transmembrane domain-containing protein 8 [Nilaparvata lugens]	-	-	-	-	-	-	-
ncbi_111046881	SPATA20	spermatogenesis-associated protein 20 [Nilaparvata lugens]	-	-	-	-	-	GO:0016787//hydrolase activity	GO:0008152//metabolic process
ncbi_111046883	Tret1	facilitated trehalose transporter Tret1-like [Nilaparvata lugens]	-	-	-	-	-	-	-
ncbi_111046889	VRK1	serine/threonine-protein kinase VRK1-like [Nilaparvata lugens]	-	-	-	-	-	-	-
ncbi_111046897	--	uncharacterized protein LOC111046910 isoform X1 [Nilaparvata lugens]	-	-	-	-	-	-	-
ncbi_111046898	tal1	T-cell acute lymphocytic leukemia protein 1 isoform X1 [Nilaparvata lugens]	-	-	-	-	-	-	-
ncbi_111046938	--	microtubule-associated protein 10-like [Nylanderia fulva]	-	-	-	-	-	-	-
ncbi_111047063	--	mediator of RNA polymerase II transcription subunit 12-like protein [Nematostella vectensis]	-	-	-	-	-	-	-
ncbi_111047215	--	zinc finger protein 493-like [Nilaparvata lugens]	Human Diseases	Infectious diseases	ko05168//Herpes simplex infection	K09228	-	-	-
ncbi_111047218	ttll-15	Eri-1-2 [Nilaparvata lugens]	-	-	-	-	-	-	-
ncbi_111047253	Cd63	CD63 antigen-like [Nilaparvata lugens]	Cellular Processes;Human Diseases	Transport and catabolism;Cancers	ko04142//Lysosome;ko05205//Proteoglycans in cancer	K06497;K06497	-	-	-
ncbi_111047255	--	connectin-like [Nilaparvata lugens]	-	-	-	-	-	-	-
ncbi_111047270	CYP4C1	cytochrome P450 4C1-like isoform X1 [Nilaparvata lugens]	-	-	-	-	-	-	-
ncbi_111047271	CYP4C1	cytochrome P450 CYP417A1v2 [Nilaparvata lugens]	-	-	-	-	-	-	-
ncbi_111047276	EbpIII	chemosensory protein [Nilaparvata lugens]	-	-	-	-	-	-	GO:0019098//reproductive behavior;GO:0051707//response to other organism
ncbi_111047340	ARL2BP	ADP-ribosylation factor-like protein 2-binding protein isoform X2 [Nilaparvata lugens]	-	-	-	-	GO:0005815//microtubule organizing center;GO:0042995//cell projection;GO:0043231//intracellular membrane-bounded organelle	-	GO:0042516//regulation of tyrosine phosphorylation of Stat3 protein;GO:0072595//maintenance of protein localization in organelle;GO:2001141//regulation of RNA biosynthetic process
ncbi_111047392	--	UPF0390 protein UM03986 [Leptinotarsa decemlineata]	-	-	-	-	-	-	-
ncbi_111047473	--	growth hormone-inducible transmembrane protein-like [Nilaparvata lugens]	-	-	-	-	-	-	-
ncbi_111047502	--	pro-resilin-like [Sipha flava]	-	-	-	-	-	-	-
ncbi_111047513	--	Mushroom body large-type Kenyon cell-specific protein 1 [Eufriesea mexicana]	-	-	-	-	-	-	-
ncbi_111047580	--	uncharacterized protein LOC111047580 [Nilaparvata lugens]	-	-	-	-	-	-	-
ncbi_111047586	STRAP	serine-threonine kinase receptor-associated protein [Nilaparvata lugens]	Genetic Information Processing	Translation	ko03013//RNA transport	K13137	GO:0043234//protein complex	-	GO:0006796//phosphate-containing compound metabolic process;GO:0035114//imaginal disc-derived appendage morphogenesis
ncbi_111047675	fsta	follistatin-A, partial [Nilaparvata lugens]	Environmental Information Processing	Signal transduction	ko04350//TGF-beta signaling pathway	K04661	-	-	GO:0048513//animal organ development
ncbi_111047688	snk	serine protease snake-like [Nilaparvata lugens]	-	-	-	-	-	GO:0016787//hydrolase activity	-
ncbi_111047732	RhoGAP100F	rho GTPase-activating protein 100F-like [Nilaparvata lugens]	-	-	-	-	-	-	-
ncbi_111047751	--	shootin-1-like [Nilaparvata lugens]	-	-	-	-	-	-	-
ncbi_111047800	UCP2	mitochondrial uncoupling protein 2-like isoform X1 [Nilaparvata lugens]	-	-	-	-	GO:0019866//organelle inner membrane;GO:0043231//intracellular membrane-bounded organelle	GO:0005488//binding	GO:0001101//response to acid chemical;GO:0001678//cellular glucose homeostasis;GO:0001889//liver development;GO:0006818//hydrogen transport;GO:0009267//cellular response to starvation;GO:0009746//response to hexose;GO:0022900//electron transport chain;GO:0032845//negative regulation of homeostatic process;GO:0032868//response to insulin;GO:0042391//regulation of membrane potential;GO:0042981//reg…
ncbi_111047866	PPAF1	proclotting enzyme-2 [Nilaparvata lugens]	-	-	-	-	-	GO:0003824//catalytic activity	-
ncbi_111047895	COPE	coatomer subunit epsilon [Nilaparvata lugens]	-	-	-	-	-	-	-
ncbi_111047999	PRPSAP2	phosphoribosyl pyrophosphate synthase-associated protein 2 [Nilaparvata lugens]	-	-	-	-	-	GO:0016778//diphosphotransferase activity	GO:0009117//nucleotide metabolic process
ncbi_111048009	Tmprss6	melanization protease 1-like isoform X1 [Nilaparvata lugens]	-	-	-	-	-	GO:0016787//hydrolase activity	-
ncbi_111048018	F9	clotting factor C [Nilaparvata lugens]	-	-	-	-	-	-	-
ncbi_111048023	Hen1	small RNA 2'-O-methyltransferase isoform X1 [Myzus persicae]	-	-	-	-	-	GO:0008168//methyltransferase activity	GO:0009451//RNA modification;GO:0016441//posttranscriptional gene silencing
ncbi_111048067	--	zinc finger protein 2-like [Nilaparvata lugens]	-	-	-	-	-	-	-
ncbi_111048151	--	uncharacterized protein LOC111048151 isoform X1 [Nilaparvata lugens]	-	-	-	-	-	-	-
ncbi_111048164	--	mucin-5AC-like [Nilaparvata lugens]	-	-	-	-	-	-	-
ncbi_111048166	--	helicase SWR1 isoform X1 [Ceratina calcarata]	-	-	-	-	-	-	-
ncbi_111048195	--	uncharacterized protein LOC111048195 [Nilaparvata lugens]	-	-	-	-	-	-	-
ncbi_111048198	MIB1	E3 ubiquitin-protein ligase MIB1-like [Nilaparvata lugens]	-	-	-	-	-	-	-
ncbi_111048231	Ubqln1	ubiquilin-1 [Nilaparvata lugens]	Genetic Information Processing	Folding, sorting and degradation	ko04141//Protein processing in endoplasmic reticulum	K04523	GO:0044444//cytoplasmic part	GO:0032403//protein complex binding	-
ncbi_111048236	PAQR3	LOW QUALITY PROTEIN: progestin and adipoQ receptor family member 3 [Nilaparvata lugens]	-	-	-	-	-	-	-
ncbi_111048296	mnb	serine/threonine-protein kinase minibrain [Nilaparvata lugens]	-	-	-	-	GO:0033267//axon part	GO:0004672//protein kinase activity;GO:0032550//purine ribonucleoside binding	GO:0006468//protein phosphorylation;GO:0007417//central nervous system development;GO:0007631//feeding behavior;GO:0008306//associative learning;GO:0008582//regulation of synaptic growth at neuromuscular junction;GO:0009416//response to light stimulus;GO:0035330//regulation of hippo signaling;GO:0045807//positive regulation of endocytosis;GO:0048511//rhythmic process
ncbi_111048310	--	uncharacterized protein LOC111048310 [Nilaparvata lugens]	-	-	-	-	-	-	-
ncbi_111048337	CRYL1	lambda-crystallin [Nilaparvata lugens]	Metabolism;Metabolism	Global and overview maps;Carbohydrate metabolism	ko01100//Metabolic pathways;ko00040//Pentose and glucuronate interconversions	K13247;K13247	-	GO:0016616//oxidoreductase activity, acting on the CH-OH group of donors, NAD or NADP as acceptor;GO:0043168//anion binding;GO:0048037//cofactor binding	GO:0032787//monocarboxylic acid metabolic process
ncbi_111048416	--	TLR4 interactor with leucine rich repeats isoform X1 [Nilaparvata lugens]	-	-	-	-	GO:0005924//cell-substrate adherens junction;GO:0016020//membrane;GO:0032991//macromolecular complex	GO:0005488//binding	GO:0030336//negative regulation of cell migration;GO:0035385//Roundabout signaling pathway
ncbi_111048427	banp	protein BANP-like isoform X1 [Nilaparvata lugens]	-	-	-	-	GO:0043231//intracellular membrane-bounded organelle	-	GO:0009895//negative regulation of catabolic process;GO:0033365//protein localization to organelle
ncbi_111048431	GDF3	growth/differentiation factor 10-like isoform X1 [Nilaparvata lugens]	Environmental Information Processing	Signaling molecules and interaction	ko04060//Cytokine-cytokine receptor interaction	K22674	-	-	-
ncbi_111048504	--	type-1 angiotensin II receptor-associated protein [Frankliniella occidentalis]	-	-	-	-	-	-	-
ncbi_111048564	--	uncharacterized protein LOC111048564 [Nilaparvata lugens]	-	-	-	-	-	-	-
ncbi_111048587	TTLL1	probable tubulin polyglutamylase TTLL1 isoform X1 [Nilaparvata lugens]	-	-	-	-	-	-	GO:0008152//metabolic process
ncbi_111048626	ndl	ovarian serine protease [Nilaparvata lugens]	-	-	-	-	-	-	-
ncbi_111048650	--	protein takeout-like [Nilaparvata lugens]	-	-	-	-	-	-	GO:0000003//reproduction
ncbi_111048704	RGN	regucalcin-like, partial [Nilaparvata lugens]	Metabolism;Metabolism;Metabolism;Metabolism	Global and overview maps;Global and overview maps;Carbohydrate metabolism;Carbohydrate metabolism	ko01100//Metabolic pathways;ko01200//Carbon metabolism;ko00053//Ascorbate and aldarate metabolism;ko00030//Pentose phosphate pathway	K01053;K01053;K01053;K01053	-	-	-
ncbi_111048713	bre-4	beta-1,4-galactosyltransferase 4-like [Nilaparvata lugens]	Metabolism;Metabolism;Metabolism;Metabolism;Metabolism;Metabolism;Metabolism;Metabolism	Global and overview maps;Glycan biosynthesis and metabolism;Glycan biosynthesis and metabolism;Glycan biosynthesis and metabolism;Carbohydrate metabolism;Glycan biosynthesis and metabolism;Glycan biosynthesis and metabolism;Glycan biosynthesis and metabolism	ko01100//Metabolic pathways;ko00513//Various types of N-glycan biosynthesis;ko00510//N-Glycan biosynthesis;ko00514//Other types of O-glycan biosynthesis;ko00052//Galactose metabolism;ko00515//Mannose type O-glycan biosyntheis;ko00601//Glycosphingolipid biosynthesis - lacto and neolacto series;ko00533//Glycosaminoglycan biosynthesis - keratan sulfate	K07967;K07967;K07967;K07967;K07967;K07967;K07967;K07967	-	GO:0016740//transferase activity	-
ncbi_111048714	--	leucine-rich repeat-containing protein 23-like [Nilaparvata lugens]	-	-	-	-	-	-	-
ncbi_111048726	cu	nocturnin isoform X1 [Nilaparvata lugens]	-	-	-	-	GO:0043234//protein complex;GO:0044424//intracellular part	-	GO:0000956//nuclear-transcribed mRNA catabolic process;GO:0007626//locomotory behavior;GO:0009314//response to radiation
ncbi_111048735	PNLIPRP2	pancreatic lipase-related protein 2-like [Nilaparvata lugens]	-	-	-	-	-	GO:0016787//hydrolase activity	-
ncbi_111048749	ABCC1	multidrug resistance-associated protein 1-like [Nilaparvata lugens]	Human Diseases;Environmental Information Processing;Organismal Systems;Environmental Information Processing;Human Diseases	Cancers;Signal transduction;Digestive system;Membrane transport;Drug resistance	ko05206//MicroRNAs in cancer;ko04071//Sphingolipid signaling pathway;ko04977//Vitamin digestion and absorption;ko02010//ABC transporters;ko01523//Antifolate resistance	K05665;K05665;K05665;K05665;K05665	-	-	-
ncbi_111048782	--	WD repeat-containing protein 60 [Nilaparvata lugens]	-	-	-	-	-	-	-
ncbi_111048799	GRXS17	glutaredoxin-3 [Nilaparvata lugens]	-	-	-	-	GO:0031988//membrane-bounded vesicle;GO:0044444//cytoplasmic part	GO:0003723//RNA binding;GO:0005515//protein binding	GO:0008016//regulation of heart contraction;GO:0009987//cellular process;GO:0010611//regulation of cardiac muscle hypertrophy;GO:0019538//protein metabolic process;GO:0055076//transition metal ion homeostasis
ncbi_111048844	--	v-type proton atpase catalytic subunit a [Lasius niger]	-	-	-	-	-	-	-
ncbi_111048875	PTK7	inactive tyrosine-protein kinase 7-like isoform X1 [Nilaparvata lugens]	-	-	-	-	-	GO:0016740//transferase activity	GO:0002009//morphogenesis of an epithelium;GO:0044763//single-organism cellular process;GO:0048731//system development
ncbi_111048878	Nep2	endothelin-converting enzyme homolog isoform X1 [Nilaparvata lugens]	-	-	-	-	-	GO:0016787//hydrolase activity	-
ncbi_111048910	--	translocation protein SEC62 [Nilaparvata lugens]	Genetic Information Processing;Genetic Information Processing	Folding, sorting and degradation;Folding, sorting and degradation	ko04141//Protein processing in endoplasmic reticulum;ko03060//Protein export	K12275;K12275	-	-	-
ncbi_111048913	--	putative uncharacterized protein DDB_G0286901 isoform X1 [Nilaparvata lugens]	-	-	-	-	-	-	-
ncbi_111048958	meak7	TLD domain-containing protein 1 [Nilaparvata lugens]	-	-	-	-	-	-	-
ncbi_111048961	GGT1	gamma-glutamyltranspeptidase 1-like [Nilaparvata lugens]	Metabolism;Metabolism;Metabolism;Metabolism	Global and overview maps;Metabolism of other amino acids;Lipid metabolism;Metabolism of other amino acids	ko01100//Metabolic pathways;ko00480//Glutathione metabolism;ko00590//Arachidonic acid metabolism;ko00430//Taurine and hypotaurine metabolism	K18592;K18592;K18592;K18592	-	-	GO:0044237//cellular metabolic process
ncbi_111049012	--	gastrula zinc finger protein XlCGF17.1-like [Nilaparvata lugens]	-	-	-	-	-	-	-
ncbi_111049027	--	uncharacterized protein LOC111049027 [Nilaparvata lugens]	-	-	-	-	-	-	-
ncbi_111049066	--	loricrin-like [Nilaparvata lugens]	-	-	-	-	-	-	-
ncbi_111049131	PDCD11	protein RRP5 homolog [Nilaparvata lugens]	-	-	-	-	GO:0044444//cytoplasmic part	-	GO:0010467//gene expression;GO:0016070//RNA metabolic process;GO:0044763//single-organism cellular process;GO:0050794//regulation of cellular process
ncbi_111049140	OGDHL	2-oxoglutarate dehydrogenase-like, mitochondrial [Nilaparvata lugens]	Metabolism;Metabolism;Metabolism	Global and overview maps;Global and overview maps;Carbohydrate metabolism	ko01100//Metabolic pathways;ko01200//Carbon metabolism;ko00020//Citrate cycle (TCA cycle)	K00164;K00164;K00164	GO:0043234//protein complex;GO:0044446//intracellular organelle part	-	GO:0044710//single-organism metabolic process
ncbi_111049168	--	four-domain proteases inhibitor [Bombus terrestris]	-	-	-	-	-	-	-
ncbi_111049249	--	uncharacterized protein LOC111049249 isoform X1 [Nilaparvata lugens]	-	-	-	-	-	-	-
ncbi_111049250	--	carbonic anhydrase 1-like [Nilaparvata lugens]	Metabolism;Metabolism	Global and overview maps;Energy metabolism	ko01100//Metabolic pathways;ko00910//Nitrogen metabolism	K01672;K01672	-	-	-
ncbi_111049255	USP2	ubiquitin carboxyl-terminal hydrolase 2-like [Nilaparvata lugens]	-	-	-	-	-	GO:0008233//peptidase activity	-
ncbi_111049287	--	Type IV secretion system protein PtlH [Orchesella cincta]	-	-	-	-	-	-	-
ncbi_111049320	NTRK2	high affinity nerve growth factor receptor-like [Nilaparvata lugens]	Human Diseases;Environmental Information Processing;Environmental Information Processing;Environmental Information Processing;Cellular Processes;Human Diseases;Organismal Systems;Organismal Systems;Human Diseases;Human Diseases	Cancers;Signal transduction;Signal transduction;Signal transduction;Cell growth and death;Cancers;Nervous system;Sensory system;Cancers;Cancers	ko05200//Pathways in cancer;ko04010//MAPK signaling pathway;ko04151//PI3K-Akt signaling pathway;ko04014//Ras signaling pathway;ko04210//Apoptosis;ko05202//Transcriptional misregulation in cancers;ko04722//Neurotrophin signaling pathway;ko04750//Inflammatory mediator regulation of TRP channels;ko05230//Central carbon metabolism in cancer;ko05216//Thyroid cancer	K03176;K03176;K03176;K03176;K03176;K03176;K03176;K03176;K03176;K03176	-	GO:0004713//protein tyrosine kinase activity	GO:0006468//protein phosphorylation
ncbi_111049327	Samd4a	protein Smaug homolog 1-like [Nilaparvata lugens]	-	-	-	-	-	-	-
ncbi_111049362	--	Protein translocase subunit secA [Harpegnathos saltator]	-	-	-	-	-	-	-
ncbi_111049370	Ggt1	gamma-glutamyltranspeptidase 1-like isoform X1 [Nilaparvata lugens]	Metabolism;Metabolism;Metabolism;Metabolism	Global and overview maps;Metabolism of other amino acids;Lipid metabolism;Metabolism of other amino acids	ko01100//Metabolic pathways;ko00480//Glutathione metabolism;ko00590//Arachidonic acid metabolism;ko00430//Taurine and hypotaurine metabolism	K18592;K18592;K18592;K18592	-	-	GO:0044237//cellular metabolic process
ncbi_111049383	ple	tyrosine 3-monooxygenase [Nilaparvata lugens]	Metabolism;Human Diseases;Human Diseases;Organismal Systems;Human Diseases;Human Diseases;Organismal Systems;Metabolism;Metabolism	Global and overview maps;Substance dependence;Neurodegenerative diseases;Nervous system;Substance dependence;Substance dependence;Endocrine system;Metabolism of cofactors and vitamins;Amino acid metabolism	ko01100//Metabolic pathways;ko05034//Alcoholism;ko05012//Parkinson disease;ko04728//Dopaminergic synapse;ko05031//Amphetamine addiction;ko05030//Cocaine addiction;ko04917//Prolactin signaling pathway;ko00790//Folate biosynthesis;ko00350//Tyrosine metabolism	K00501;K00501;K00501;K00501;K00501;K00501;K00501;K00501;K00501	-	GO:0016714//oxidoreductase activity, acting on paired donors, with incorporation or reduction of molecular oxygen, reduced pteridine as one donor, and incorporation of one atom of oxygen;GO:0031406//carboxylic acid binding;GO:0046914//transition metal ion binding	GO:0006520//cellular amino acid metabolic process;GO:0006950//response to stress;GO:0007427//epithelial cell migration, open tracheal system;GO:0007444//imaginal disc development;GO:0007564//regulation of chitin-based cuticle tanning;GO:0007619//courtship behavior;GO:0007626//locomotory behavior;GO:0009266//response to temperature stimulus;GO:0042069//regulation of catecholamine metabolic process…
ncbi_111049389	--	protein PFC0760c-like [Nilaparvata lugens]	-	-	-	-	-	-	-
ncbi_111049445	--	uncharacterized protein LOC111049445 [Nilaparvata lugens]	-	-	-	-	-	-	-
ncbi_111049513	--	outer dense fiber protein 3-B-like [Nilaparvata lugens]	-	-	-	-	-	-	-
ncbi_111049563	ELOVL7	elongation of very long chain fatty acids protein 7-like [Nilaparvata lugens]	Metabolism;Metabolism;Metabolism;Metabolism	Global and overview maps;Global and overview maps;Lipid metabolism;Lipid metabolism	ko01100//Metabolic pathways;ko01212//Fatty acid metabolism;ko01040//Biosynthesis of unsaturated fatty acids;ko00062//Fatty acid elongation	K10250;K10250;K10250;K10250	-	GO:0016740//transferase activity	GO:0006633//fatty acid biosynthetic process;GO:0030154//cell differentiation;GO:0035556//intracellular signal transduction
ncbi_111049579	--	protein starmaker-like [Nilaparvata lugens]	-	-	-	-	-	-	-
ncbi_111049611	ANGPT4	angiopoietin-2 isoform X1 [Nilaparvata lugens]	-	-	-	-	-	-	-
ncbi_111049626	--	keratin-associated protein 10-7 [Leptinotarsa decemlineata]	-	-	-	-	-	-	-
ncbi_111049631	TTLL3A	tubulin glycylase 3A-like [Nilaparvata lugens]	-	-	-	-	-	-	GO:0006464//cellular protein modification process
ncbi_111049652	Ptpn4	tyrosine-protein phosphatase non-receptor type 4 [Nilaparvata lugens]	-	-	-	-	-	GO:0016791//phosphatase activity	GO:0006470//protein dephosphorylation
ncbi_111049686	Znf711	zinc finger protein 354B-like, partial [Nilaparvata lugens]	-	-	-	-	-	-	-
ncbi_111049689	HINT1	histidine triad nucleotide-binding protein 1 [Nilaparvata lugens]	-	-	-	-	GO:0016020//membrane;GO:0031988//membrane-bounded vesicle;GO:0043231//intracellular membrane-bounded organelle	GO:0003824//catalytic activity	GO:0006195//purine nucleotide catabolic process;GO:0010468//regulation of gene expression;GO:0072331//signal transduction by p53 class mediator
ncbi_111049707	anon-3B1.2	circadian clock-controlled protein-like [Nilaparvata lugens]	-	-	-	-	-	-	-
ncbi_111049781	--	deleted in lung and esophageal cancer protein 1 [Lingula anatina]	-	-	-	-	-	-	-
ncbi_111049819	--	gastrula zinc finger protein XlCGF57.1-like [Nilaparvata lugens]	-	-	-	-	-	-	-
ncbi_111049850	--	mid1-interacting protein 1-B isoform X1 [Cimex lectularius]	-	-	-	-	-	-	-
ncbi_111049904	tsl	torso-like protein [Nilaparvata lugens]	Environmental Information Processing	Signal transduction	ko04013//MAPK signaling pathway - fly	K12377	-	-	-
ncbi_111049915	--	DNA transposase THAP9 [Anabarilius grahami]	-	-	-	-	-	-	-
ncbi_111049942	CDK5RAP2	CDK5 regulatory subunit-associated protein 2-like isoform X2 [Nilaparvata lugens]	-	-	-	-	GO:0005737//cytoplasm;GO:0015630//microtubule cytoskeleton;GO:0044430//cytoskeletal part	GO:0005515//protein binding	GO:0000226//microtubule cytoskeleton organization;GO:0050794//regulation of cellular process
ncbi_111050065	Dnah8	dynein heavy chain 8, axonemal [Nilaparvata lugens]	Human Diseases	Neurodegenerative diseases	ko05016//Huntington disease	K10408	GO:0005858//axonemal dynein complex	GO:0003774//motor activity;GO:0036094//small molecule binding;GO:0097159//organic cyclic compound binding;GO:1901363//heterocyclic compound binding	GO:0048870//cell motility
ncbi_111050302	kcnk9	two pore potassium channel protein sup-9 [Nilaparvata lugens]	Organismal Systems	Endocrine system	ko04925//Aldosterone synthesis and secretion	K04919	GO:0031224//intrinsic component of membrane	GO:0005261//cation channel activity;GO:0046983//protein dimerization activity	GO:0034220//ion transmembrane transport
ncbi_111050324	--	uncharacterized protein LOC111050324 [Nilaparvata lugens]	-	-	-	-	-	-	-
ncbi_111050327	mdh1b	malate dehydrogenase 1B, partial [Asbolus verrucosus]	-	-	-	-	-	-	-
ncbi_111050333	slc25a40	solute carrier family 25 member 40-like isoform X1 [Nilaparvata lugens]	-	-	-	-	GO:0016020//membrane	-	-
ncbi_111050370	--	cingulin-like protein 1 [Nilaparvata lugens]	-	-	-	-	-	-	-
ncbi_111050388	Ltf	transferrin [Nilaparvata lugens]	-	-	-	-	-	-	GO:0044699//single-organism process;GO:0050896//response to stimulus
ncbi_111050414	--	leucine-rich repeat and coiled-coil domain-containing protein 1-like [Nilaparvata lugens]	-	-	-	-	-	-	-
ncbi_111050438	--	uncharacterized protein LOC111050438 [Nilaparvata lugens]	-	-	-	-	-	-	-
ncbi_111050469	--	zinc finger CCCH domain-containing protein 13-like [Frankliniella occidentalis]	-	-	-	-	-	-	-
ncbi_111050478	--	putative uncharacterized protein DDB_G0282133 [Nilaparvata lugens]	-	-	-	-	-	-	-
ncbi_111050528	--	nose resistant to fluoxetine protein 6-like [Nilaparvata lugens]	-	-	-	-	-	-	-
ncbi_111050536	--	uncharacterized protein LOC111050536 [Nilaparvata lugens]	-	-	-	-	-	-	-
ncbi_111050577	--	uncharacterized protein LOC111050577 [Nilaparvata lugens]	-	-	-	-	-	-	-
ncbi_111050691	--	ly6/neurotoxin 10 [Locusta migratoria manilensis]	-	-	-	-	-	-	-
ncbi_111050706	TfIIFbeta	general transcription factor IIF subunit 2 [Nilaparvata lugens]	Genetic Information Processing	Transcription	ko03022//Basal transcription factors	K03139	GO:0044451//nucleoplasm part	GO:0032550//purine ribonucleoside binding;GO:0042623//ATPase activity, coupled	GO:0006352//DNA-templated transcription, initiation;GO:0006412//translation
ncbi_111050791	Oaz	zinc finger protein 423 homolog [Nilaparvata lugens]	-	-	-	-	-	-	-
ncbi_111050813	Jafrac1	peroxiredoxin 1-like [Nilaparvata lugens]	Cellular Processes;Human Diseases	Transport and catabolism;Infectious diseases	ko04146//Peroxisome;ko05146//Amoebiasis	K13279;K13279	GO:0043234//protein complex;GO:0044444//cytoplasmic part	GO:0004601//peroxidase activity	GO:0003006//developmental process involved in reproduction;GO:0010259//multicellular organism aging;GO:0016477//cell migration;GO:0019725//cellular homeostasis;GO:0022610//biological adhesion;GO:0033554//cellular response to stress;GO:0042743//hydrogen peroxide metabolic process;GO:0044710//single-organism metabolic process
ncbi_111050819	HSPG2	lachesin-like isoform X2 [Photinus pyralis]	-	-	-	-	-	-	-
ncbi_111050821	Polr3h	DNA-directed RNA polymerase III subunit RPC8 [Nilaparvata lugens]	Genetic Information Processing;Organismal Systems	Transcription;Immune system	ko03020//RNA polymerase;ko04623//Cytosolic DNA-sensing pathway	K03022;K03022	-	-	-
ncbi_111050866	--	uncharacterized protein LOC111050866 [Nilaparvata lugens]	-	-	-	-	-	-	-
ncbi_111050881	DRC3	dynein regulatory complex subunit 3-like [Nilaparvata lugens]	-	-	-	-	-	-	-
ncbi_111050882	Gstt2	glutathione s-transferase T1 [Nilaparvata lugens]	Metabolism;Human Diseases;Human Diseases;Organismal Systems;Human Diseases;Metabolism;Metabolism;Human Diseases;Human Diseases;Metabolism;Metabolism	Global and overview maps;Cancers;Cancers;Aging;Cardiovascular diseases;Xenobiotics biodegradation and metabolism;Metabolism of other amino acids;Cancers;Drug resistance;Xenobiotics biodegradation and metabolism;Xenobiotics biodegradation and metabolism	ko01100//Metabolic pathways;ko05200//Pathways in cancer;ko05225//Hepatocellular carcinoma;ko04212//Longevity regulating pathway - worm;ko05418//Fluid shear stress and atherosclerosis;ko00983//Drug metabolism - other enzymes;ko00480//Glutathione metabolism;ko05204//Chemical carcinogenesis;ko01524//Platinum drug resistance;ko00980//Metabolism of xenobiotics by cytochrome P450;ko00982//Drug metaboli…	K00799;K00799;K00799;K00799;K00799;K00799;K00799;K00799;K00799;K00799;K00799	-	GO:0003824//catalytic activity	-
ncbi_111051007	--	DUF4485 domain-containing protein [Aphis craccivora]	-	-	-	-	-	-	-
ncbi_111051013	--	radial spoke head 10 homolog B-like isoform X1 [Nilaparvata lugens]	-	-	-	-	-	-	-
ncbi_111051124	--	cilia- and flagella-associated protein 58-like [Nilaparvata lugens]	-	-	-	-	-	-	-
ncbi_111051137	Cbp53E	calbindin-32 isoform X1 [Nilaparvata lugens]	-	-	-	-	-	GO:0046872//metal ion binding	-
ncbi_111051261	Iars1	Isoleucine--tRNA ligase [Blattella germanica]	Genetic Information Processing	Translation	ko00970//Aminoacyl-tRNA biosynthesis	K01870	GO:0044424//intracellular part	GO:0004812//aminoacyl-tRNA ligase activity;GO:0032550//purine ribonucleoside binding;GO:0052689//carboxylic ester hydrolase activity	GO:0006418//tRNA aminoacylation for protein translation;GO:0006448//regulation of translational elongation
ncbi_111051306	--	protein NLRC5-like, partial [Nilaparvata lugens]	-	-	-	-	-	-	-
ncbi_111051318	--	hydrocephalus-inducing protein homolog, partial [Nilaparvata lugens]	-	-	-	-	-	-	GO:0007275//multicellular organism development;GO:0048856//anatomical structure development
ncbi_111051368	BTBD3	BTB/POZ domain-containing protein 6-B-like [Nilaparvata lugens]	-	-	-	-	-	-	-
ncbi_111051406	--	uncharacterized protein LOC111051406 isoform X1 [Nilaparvata lugens]	-	-	-	-	-	-	-
ncbi_111051414	--	uncharacterized protein LOC111051414 [Nilaparvata lugens]	-	-	-	-	-	-	-
ncbi_111051435	--	uncharacterized protein LOC111051435 [Nilaparvata lugens]	-	-	-	-	-	-	-
ncbi_111051452	--	uncharacterized protein LOC111051452 [Nilaparvata lugens]	-	-	-	-	-	-	-
ncbi_111051566	Oacyl	nose resistant to fluoxetine protein 6-like [Nilaparvata lugens]	-	-	-	-	-	-	-
ncbi_111051651	INTS7	integrator complex subunit 7 [Nilaparvata lugens]	-	-	-	-	-	-	-
ncbi_111051680	--	lugensin A [Nilaparvata lugens]	-	-	-	-	-	-	-
ncbi_111051698	--	lugensin A [Nilaparvata lugens]	-	-	-	-	-	-	-
ncbi_111051699	--	lugensin A [Nilaparvata lugens]	-	-	-	-	-	-	-
ncbi_111051700	--	lugensin A [Nilaparvata lugens]	-	-	-	-	-	-	-
ncbi_111051725	TBC1D1	PREDICTED: TBC1 domain family member 1 [Bemisia tabaci]	Organismal Systems;Human Diseases	Endocrine system;Endocrine and metabolic diseases	ko04919//Thyroid hormone signaling pathway;ko04931//Insulin resistance	K17902;K17902	GO:0044464//cell part	GO:0005102//receptor binding	-
ncbi_111051745	--	fibroblast growth factor receptor-like [Zootermopsis nevadensis]	-	-	-	-	-	-	-
ncbi_111051778	--	pre-mRNA-splicing factor CWC22 homolog isoform X1 [Nilaparvata lugens]	-	-	-	-	-	-	-
ncbi_111051810	SLC1A2	excitatory amino acid transporter-like [Nilaparvata lugens]	Human Diseases;Organismal Systems;Organismal Systems;Human Diseases	Neurodegenerative diseases;Nervous system;Nervous system;Neurodegenerative diseases	ko05016//Huntington disease;ko04721//Synaptic vesicle cycle;ko04724//Glutamatergic synapse;ko05014//Amyotrophic lateral sclerosis (ALS)	K05613;K05613;K05613;K05613	GO:0043005//neuron projection;GO:0044425//membrane part	GO:0005310//dicarboxylic acid transmembrane transporter activity;GO:0005343//organic acid:sodium symporter activity	GO:0009416//response to light stimulus;GO:0015813//L-glutamate transport;GO:0042221//response to chemical;GO:0043090//amino acid import;GO:0044763//single-organism cellular process;GO:0048731//system development
ncbi_111051820	Tkfc	triokinase/FMN cyclase-like [Nilaparvata lugens]	Metabolism;Metabolism;Metabolism;Metabolism;Organismal Systems	Global and overview maps;Global and overview maps;Lipid metabolism;Carbohydrate metabolism;Immune system	ko01100//Metabolic pathways;ko01200//Carbon metabolism;ko00561//Glycerolipid metabolism;ko00051//Fructose and mannose metabolism;ko04622//RIG-I-like receptor signaling pathway	K00863;K00863;K00863;K00863;K00863	-	GO:0003824//catalytic activity	GO:0044237//cellular metabolic process
ncbi_111051860	--	nose resistant to fluoxetine protein 6-like [Nilaparvata lugens]	-	-	-	-	-	-	-
ncbi_111051862	EFHC1	EF-hand domain-containing protein 1-like [Nilaparvata lugens]	-	-	-	-	GO:0005815//microtubule organizing center;GO:0005819//spindle	GO:0005488//binding	GO:0022029//telencephalon cell migration
ncbi_111051964	--	uncharacterized protein DDB_G0290685-like [Nilaparvata lugens]	-	-	-	-	-	-	-
ncbi_111052014	--	extensin-like isoform X8 [Manduca sexta]	-	-	-	-	-	-	-
ncbi_111052066	AAEL007402	mediator of RNA polymerase II transcription subunit 1 [Nilaparvata lugens]	Organismal Systems;Human Diseases	Endocrine system;Drug resistance	ko04919//Thyroid hormone signaling pathway;ko01522//Endocrine resistance	K15144;K15144	-	-	GO:0006351//transcription, DNA-templated
ncbi_111052159	--	uncharacterized protein LOC111052159 [Nilaparvata lugens]	-	-	-	-	-	-	-
ncbi_111052170	Cubn	cubilin [Nilaparvata lugens]	Organismal Systems	Digestive system	ko04977//Vitamin digestion and absorption	K14616	GO:0044464//cell part	-	-
ncbi_111052271	gpt2l	alanine aminotransferase 1-like [Nilaparvata lugens]	Metabolism;Metabolism;Metabolism;Metabolism;Metabolism;Metabolism	Global and overview maps;Global and overview maps;Global and overview maps;Amino acid metabolism;Global and overview maps;Amino acid metabolism	ko01100//Metabolic pathways;ko01200//Carbon metabolism;ko01230//Biosynthesis of amino acids;ko00250//Alanine, aspartate and glutamate metabolism;ko01210//2-Oxocarboxylic acid metabolism;ko00220//Arginine biosynthesis	K00814;K00814;K00814;K00814;K00814;K00814	-	-	-
ncbi_111052314	tdc-1	aromatic-L-amino-acid decarboxylase-like isoform X1 [Nilaparvata lugens]	Metabolism;Metabolism	Global and overview maps;Amino acid metabolism	ko01100//Metabolic pathways;ko00350//Tyrosine metabolism	K22329;K22329	-	GO:0016831//carboxy-lyase activity	GO:0007626//locomotory behavior;GO:0030534//adult behavior;GO:0033057//multicellular organism reproductive behavior
ncbi_111052342	--	inactive dipeptidyl peptidase 10, partial [Diabrotica virgifera virgifera]	-	-	-	-	-	-	-
ncbi_111052404	--	protein IFH1-like [Nilaparvata lugens]	-	-	-	-	-	-	-
ncbi_111052460	SLC24A5	sodium/potassium/calcium exchanger 4-like [Nilaparvata lugens]	-	-	-	-	-	-	-
ncbi_111052550	4CL1	luciferin 4-monooxygenase [Nilaparvata lugens]	Metabolism;Metabolism	Global and overview maps;Metabolism of cofactors and vitamins	ko01100//Metabolic pathways;ko00130//Ubiquinone and other terpenoid-quinone biosynthesis	K01904;K01904	-	GO:0003824//catalytic activity	-
ncbi_111052612	His2B	histone H2B [Nilaparvata lugens]	Human Diseases;Human Diseases;Human Diseases	Substance dependence;Cancers;Immune diseases	ko05034//Alcoholism;ko05203//Viral carcinogenesis;ko05322//Systemic lupus erythematosus	K11252;K11252;K11252	GO:0000785//chromatin;GO:0043189//H4/H2A histone acetyltransferase complex	GO:0003676//nucleic acid binding;GO:0046914//transition metal ion binding;GO:0046983//protein dimerization activity	GO:0006325//chromatin organization
ncbi_111052701	--	mucin-12-like [Nilaparvata lugens]	-	-	-	-	-	-	-
ncbi_111052743	FPGS	folylpolyglutamate synthase, mitochondrial isoform X1 [Nilaparvata lugens]	Metabolism;Metabolism;Human Diseases	Global and overview maps;Metabolism of cofactors and vitamins;Drug resistance	ko01100//Metabolic pathways;ko00790//Folate biosynthesis;ko01523//Antifolate resistance	K01930;K01930;K01930	-	-	-
ncbi_111052808	--	pollen-specific leucine-rich repeat extensin-like protein 1 [Nilaparvata lugens]	-	-	-	-	-	-	-
ncbi_111052953	--	extensin-3-like [Nilaparvata lugens]	-	-	-	-	-	-	-
ncbi_111052954	--	uncharacterized protein LOC111052954 [Nilaparvata lugens]	-	-	-	-	-	-	-
ncbi_111053035	Pka-C1	cAMP-dependent protein kinase catalytic subunit-like [Nilaparvata lugens]	Human Diseases;Organismal Systems;Human Diseases;Environmental Information Processing;Environmental Information Processing;Human Diseases;Human Diseases;Human Diseases;Human Diseases;Cellular Processes;Human Diseases;Human Diseases;Environmental Information Processing;Human Diseases;Environmental Information Processing;Environmental Information Processing;Organismal Systems;Organismal Systems;Org…	Cancers;Environmental adaptation;Infectious diseases;Signal transduction;Signal transduction;Substance dependence;Cancers;Neurodegenerative diseases;Infectious diseases;Transport and catabolism;Cancers;Infectious diseases;Signal transduction;Endocrine and metabolic diseases;Signal transduction;Signal transduction;Endocrine system;Nervous system;Development and regeneration;Endocrine system;Cellul…	ko05200//Pathways in cancer;ko04714//Thermogenesis;ko05165//Human papillomavirus infection;ko04024//cAMP signaling pathway;ko04010//MAPK signaling pathway;ko05034//Alcoholism;ko05203//Viral carcinogenesis;ko05012//Parkinson disease;ko05166//HTLV-I infection;ko04140//Autophagy - animal;ko05205//Proteoglycans in cancer;ko05163//Human cytomegalovirus infection;ko04014//Ras signaling pathway;ko04934/…	K04345;K04345;K04345;K04345;K04345;K04345;K04345;K04345;K04345;K04345;K04345;K04345;K04345;K04345;K04345;K04345;K04345;K04345;K04345;K04345;K04345;K04345;K04345;K04345;K04345;K04345;K04345;K04345;K04345;K04345;K04345;K04345;K04345;K04345;K04345;K04345;K04345;K04345;K04345;K04345;K04345;K04345;K04345;K04345;K04345;K04345;K04345;K04345;K04345;K04345;K04345;K04345;K04345;K04345;K04345;K04345;K04345;…	GO:0016020//membrane;GO:0044424//intracellular part	GO:0004690//cyclic nucleotide-dependent protein kinase activity;GO:0032550//purine ribonucleoside binding	GO:0001654//eye development;GO:0006464//cellular protein modification process;GO:0006796//phosphate-containing compound metabolic process;GO:0006915//apoptotic process;GO:0007017//microtubule-based process;GO:0007268//synaptic transmission;GO:0007309//oocyte axis specification;GO:0007447//imaginal disc pattern formation;GO:0007613//memory;GO:0007626//locomotory behavior;GO:0008306//associative le…
ncbi_111053071	ttll6	tubulin polyglutamylase ttll6-like isoform X4 [Nilaparvata lugens]	-	-	-	-	-	-	-
ncbi_111053117	--	uncharacterized protein LOC111053117 isoform X1 [Nilaparvata lugens]	-	-	-	-	-	-	-
ncbi_111053123	XPR1	xenotropic and polytropic retrovirus receptor 1 homolog [Nilaparvata lugens]	-	-	-	-	-	-	-
ncbi_111053148	nrf-6	nose resistant to fluoxetine protein 6-like isoform X1 [Nilaparvata lugens]	-	-	-	-	-	-	-
ncbi_111053180	RIBC1	RIB43A-like with coiled-coils protein 2 [Nilaparvata lugens]	-	-	-	-	-	-	-
ncbi_111053283	--	uncharacterized protein LOC111056397 [Nilaparvata lugens]	-	-	-	-	-	-	-
ncbi_111053286	--	uncharacterized protein LOC111053286 [Nilaparvata lugens]	-	-	-	-	-	-	-
ncbi_111053316	--	shematrin-like protein 1 [Nilaparvata lugens]	-	-	-	-	-	-	-
ncbi_111053344	Lhcgr	lutropin-choriogonadotropic hormone receptor-like [Nilaparvata lugens]	Environmental Information Processing;Environmental Information Processing;Organismal Systems;Organismal Systems;Human Diseases	Signal transduction;Signaling molecules and interaction;Endocrine system;Endocrine system;Immune diseases	ko04024//cAMP signaling pathway;ko04080//Neuroactive ligand-receptor interaction;ko04918//Thyroid hormone synthesis;ko04923//Regulation of lipolysis in adipocyte;ko05320//Autoimmune thyroid disease	K04249;K04249;K04249;K04249;K04249	-	-	-
ncbi_111053346	--	PREDICTED: pilin gene-inverting protein-like [Nicrophorus vespilloides]	-	-	-	-	-	-	-
ncbi_111053359	traG	TraG N domain containing protein [Trichuris trichiura]	-	-	-	-	-	-	-
ncbi_111053362	Fbh1	F-box DNA helicase 1-like [Nilaparvata lugens]	-	-	-	-	-	GO:0005488//binding	GO:0044238//primary metabolic process;GO:0044260//cellular macromolecule metabolic process;GO:0050794//regulation of cellular process;GO:0051716//cellular response to stimulus
ncbi_111053425	Iqca1l	IQ and AAA domain-containing protein 1-like [Nilaparvata lugens]	-	-	-	-	-	-	-
ncbi_111053431	--	AAEL003052-PA [Aedes aegypti]	-	-	-	-	GO:0031224//intrinsic component of membrane	GO:0016491//oxidoreductase activity	GO:0044238//primary metabolic process;GO:0044710//single-organism metabolic process
ncbi_111053443	Grhpr	glyoxylate reductase/hydroxypyruvate reductase-like isoform X1 [Nilaparvata lugens]	Metabolism;Metabolism;Metabolism;Metabolism	Global and overview maps;Carbohydrate metabolism;Carbohydrate metabolism;Amino acid metabolism	ko01100//Metabolic pathways;ko00620//Pyruvate metabolism;ko00630//Glyoxylate and dicarboxylate metabolism;ko00260//Glycine, serine and threonine metabolism	K00049;K00049;K00049;K00049	-	GO:0016616//oxidoreductase activity, acting on the CH-OH group of donors, NAD or NADP as acceptor	GO:0008152//metabolic process
ncbi_111053477	PPIL6	PREDICTED: peptidyl-prolyl cis-trans isomerase-like 6 [Dufourea novaeangliae]	-	-	-	-	-	-	-
ncbi_111053478	--	radial spoke head 14 homolog [Nilaparvata lugens]	-	-	-	-	-	-	-
ncbi_111053504	--	Carboxylic ester hydrolase [Temnothorax longispinosus]	-	-	-	-	-	-	-
ncbi_111053527	lolal	longitudinals lacking protein-like [Nilaparvata lugens]	-	-	-	-	GO:0043231//intracellular membrane-bounded organelle;GO:0043234//protein complex	GO:0001071//nucleic acid binding transcription factor activity;GO:0003676//nucleic acid binding;GO:0019904//protein domain specific binding;GO:0046983//protein dimerization activity	GO:0006355//regulation of transcription, DNA-templated;GO:0007431//salivary gland development;GO:0016458//gene silencing;GO:0035166//post-embryonic hemopoiesis;GO:0035239//tube morphogenesis
ncbi_111053535	--	uncharacterized protein LOC111053535 isoform X1 [Nilaparvata lugens]	-	-	-	-	-	-	-
ncbi_111053602	--	uncharacterized protein LOC111053602 isoform X1 [Nilaparvata lugens]	-	-	-	-	-	-	-
ncbi_111053613	--	protein msta-like, partial [Nilaparvata lugens]	Metabolism;Metabolism	Global and overview maps;Amino acid metabolism	ko01100//Metabolic pathways;ko00310//Lysine degradation	K11426;K11426	GO:0044424//intracellular part	-	-
ncbi_111053717	Spon1	spondin-1 [Nilaparvata lugens]	-	-	-	-	-	-	-
ncbi_111053731	LAP3	cytosol aminopeptidase-like [Nilaparvata lugens]	Metabolism;Metabolism;Metabolism	Global and overview maps;Metabolism of other amino acids;Amino acid metabolism	ko01100//Metabolic pathways;ko00480//Glutathione metabolism;ko00330//Arginine and proline metabolism	K11142;K11142;K11142	-	-	-
ncbi_111053795	--	uncharacterized protein LOC111053795 [Nilaparvata lugens]	-	-	-	-	-	-	-
ncbi_111053891	Orct	organic cation transporter protein isoform X1 [Nilaparvata lugens]	Human Diseases	Cancers	ko05231//Choline metabolism in cancer	K08202	GO:0031224//intrinsic component of membrane	GO:0008324//cation transmembrane transporter activity	GO:0001558//regulation of cell growth;GO:0006812//cation transport;GO:0040014//regulation of multicellular organism growth;GO:0048598//embryonic morphogenesis
ncbi_111053907	--	uncharacterized protein LOC111053907 [Nilaparvata lugens]	-	-	-	-	-	-	-
ncbi_111053947	eral1	GTPase Era, mitochondrial [Nilaparvata lugens]	-	-	-	-	GO:0043229//intracellular organelle	GO:0097159//organic cyclic compound binding;GO:1901363//heterocyclic compound binding	-
ncbi_111053981	--	proline-rich proteoglycan 2-like [Cottoperca gobio]	-	-	-	-	-	-	-
ncbi_111054131	--	zinc finger protein 558-like [Nilaparvata lugens]	-	-	-	-	-	-	-
ncbi_111054155	--	titin-like [Leptinotarsa decemlineata]	-	-	-	-	-	-	-
ncbi_111054162	Hsp68	heat shock protein 68-like [Nilaparvata lugens]	Cellular Processes;Genetic Information Processing;Genetic Information Processing;Environmental Information Processing;Organismal Systems;Organismal Systems;Human Diseases;Human Diseases;Human Diseases;Organismal Systems	Transport and catabolism;Transcription;Folding, sorting and degradation;Signal transduction;Endocrine system;Aging;Infectious diseases;Infectious diseases;Infectious diseases;Immune system	ko04144//Endocytosis;ko03040//Spliceosome;ko04141//Protein processing in endoplasmic reticulum;ko04010//MAPK signaling pathway;ko04915//Estrogen signaling pathway;ko04213//Longevity regulating pathway - multiple species;ko05162//Measles;ko05145//Toxoplasmosis;ko05134//Legionellosis;ko04612//Antigen processing and presentation	K03283;K03283;K03283;K03283;K03283;K03283;K03283;K03283;K03283;K03283	GO:0043231//intracellular membrane-bounded organelle;GO:0043232//intracellular non-membrane-bounded organelle;GO:0043234//protein complex	GO:0005515//protein binding;GO:0032550//purine ribonucleoside binding	GO:0001101//response to acid chemical;GO:0006950//response to stress;GO:0010259//multicellular organism aging;GO:0030154//cell differentiation;GO:0044267//cellular protein metabolic process
ncbi_111054170	ATP8B2	phospholipid-transporting ATPase ID [Cimex lectularius]	-	-	-	-	GO:0031224//intrinsic component of membrane	GO:0003824//catalytic activity;GO:0005548//phospholipid transporter activity;GO:0032550//purine ribonucleoside binding;GO:0046872//metal ion binding	GO:0015914//phospholipid transport
ncbi_111054200	--	uncharacterized protein LOC111054200 [Nilaparvata lugens]	-	-	-	-	-	-	-
ncbi_111054254	RSPH6A	radial spoke head protein 6 homolog A-like [Nilaparvata lugens]	-	-	-	-	-	-	-
ncbi_111054255	--	centriolin isoform X2 [Anoplophora glabripennis]	-	-	-	-	-	-	-
ncbi_111054263	--	protein obstructor-E-like [Nilaparvata lugens]	-	-	-	-	-	GO:0097367//carbohydrate derivative binding	GO:0006022//aminoglycan metabolic process
ncbi_111054266	DBT	lipoamide acyltransferase component of branched-chain alpha-keto acid dehydrogenase complex, mitochondrial-like [Nilaparvata lugens]	Metabolism;Metabolism;Metabolism	Global and overview maps;Amino acid metabolism;Carbohydrate metabolism	ko01100//Metabolic pathways;ko00280//Valine, leucine and isoleucine degradation;ko00640//Propanoate metabolism	K09699;K09699;K09699	GO:0043231//intracellular membrane-bounded organelle	GO:0016740//transferase activity	-
ncbi_111054271	--	odorant receptor 56a-like [Nilaparvata lugens]	-	-	-	-	-	-	-
ncbi_111054320	APOD	apolipoprotein D-like [Nilaparvata lugens]	-	-	-	-	GO:0031988//membrane-bounded vesicle;GO:0044421//extracellular region part;GO:0044444//cytoplasmic part	GO:0032934//sterol binding	GO:0001953//negative regulation of cell-matrix adhesion;GO:0006979//response to oxidative stress;GO:0008285//negative regulation of cell proliferation;GO:0009611//response to wounding;GO:0009968//negative regulation of signal transduction;GO:0019318//hexose metabolic process;GO:0032682//negative regulation of chemokine production;GO:0034443//negative regulation of lipoprotein oxidation;GO:0042306…
ncbi_111054332	myo19	unconventional myosin-XIX-like isoform X1 [Nilaparvata lugens]	-	-	-	-	GO:0044424//intracellular part	-	-
ncbi_111054340	ARMC3	armadillo repeat-containing protein 3-like [Nilaparvata lugens]	-	-	-	-	-	-	-
ncbi_111054389	DUT	deoxyuridine 5'-triphosphate nucleotidohydrolase [Nilaparvata lugens]	Metabolism;Metabolism;Metabolism	Global and overview maps;Xenobiotics biodegradation and metabolism;Nucleotide metabolism	ko01100//Metabolic pathways;ko00983//Drug metabolism - other enzymes;ko00240//Pyrimidine metabolism	K01520;K01520;K01520	-	-	-
ncbi_111054391	--	uncharacterized protein LOC111054391 [Nilaparvata lugens]	-	-	-	-	-	-	-
ncbi_111054465	CG5065	fatty acyl-CoA reductase [Nilaparvata lugens]	Cellular Processes;Organismal Systems	Transport and catabolism;Aging	ko04146//Peroxisome;ko04212//Longevity regulating pathway - worm	K13356;K13356	GO:0005777//peroxisome	GO:0016620//oxidoreductase activity, acting on the aldehyde or oxo group of donors, NAD or NADP as acceptor	-
ncbi_111054584	Gld	glucose dehydrogenase [FAD, quinone]-like [Nilaparvata lugens]	Metabolism;Metabolism	Global and overview maps;Amino acid metabolism	ko01100//Metabolic pathways;ko00260//Glycine, serine and threonine metabolism	K00108;K00108	-	GO:0016491//oxidoreductase activity	-
ncbi_111054593	--	coiled-coil domain-containing protein 65-like [Nilaparvata lugens]	-	-	-	-	-	-	-
ncbi_111054657	--	uncharacterized protein LOC111054657 [Nilaparvata lugens]	-	-	-	-	-	-	-
ncbi_111054673	--	Cubilin [Papilio xuthus]	-	-	-	-	-	-	-
ncbi_111054704	--	proteoglycan 4-like [Nilaparvata lugens]	-	-	-	-	-	-	-
ncbi_111054729	atg101	autophagy-related protein 101-like isoform X1 [Nilaparvata lugens]	Human Diseases;Human Diseases;Cellular Processes;Organismal Systems;Human Diseases;Cellular Processes	Neurodegenerative diseases;Neurodegenerative diseases;Transport and catabolism;Aging;Neurodegenerative disease;Transport and catabolism	ko05016//Huntington disease;ko05010//Alzheimer disease;ko04140//Autophagy - animal;ko04211//Longevity regulating pathway - mammal;ko05017//Spinocerebellar ataxia;ko04136//Autophagy - other eukaryotes	K19730;K19730;K19730;K19730;K19730;K19730	-	-	-
ncbi_111054738	--	ubiquitin-like protein 7 [Nilaparvata lugens]	-	-	-	-	-	-	-
ncbi_111054744	fth1-a	soma ferritin-like [Nilaparvata lugens]	Cellular Processes;Organismal Systems;Cellular Processes	Cell growth and death;Digestive system;Cell growth and death	ko04217//Necroptosis;ko04978//Mineral absorption;ko04216//Ferroptosis	K00522;K00522;K00522	GO:0044424//intracellular part	GO:0005506//iron ion binding;GO:0016724//oxidoreductase activity, oxidizing metal ions, oxygen as acceptor	GO:0000041//transition metal ion transport;GO:0044710//single-organism metabolic process;GO:0046916//cellular transition metal ion homeostasis
ncbi_111054769	--	protein msta-like isoform X1 [Nilaparvata lugens]	Metabolism;Metabolism	Global and overview maps;Amino acid metabolism	ko01100//Metabolic pathways;ko00310//Lysine degradation	K11426;K11426	GO:0043231//intracellular membrane-bounded organelle	-	-
ncbi_111054775	LIPH	lipase member H-like [Nilaparvata lugens]	-	-	-	-	-	-	-
ncbi_111054798	PLB1	phospholipase B1, membrane-associated-like [Nilaparvata lugens]	-	-	-	-	-	-	-
ncbi_111054799	Plb1	phospholipase B1, membrane-associated-like [Nilaparvata lugens]	-	-	-	-	-	-	GO:0006897//endocytosis
ncbi_111055048	ppp1cc-a	serine/threonine-protein phosphatase alpha-3 isoform-like [Nilaparvata lugens]	Environmental Information Processing;Human Diseases;Human Diseases;Human Diseases;Cellular Processes;Organismal Systems;Cellular Processes;Environmental Information Processing;Cellular Processes;Organismal Systems;Organismal Systems;Cellular Processes;Organismal Systems;Environmental Information Processing;Organismal Systems;Genetic Information Processing;Organismal Systems;Human Diseases;Organis…	Signal transduction;Substance dependence;Infectious diseases;Cancers;Cell motility;Endocrine system;Cellular community - eukaryotes;Signal transduction;Cell growth and death;Endocrine system;Circulatory system;Cell growth and death;Circulatory system;Signal transduction;Nervous system;Translation;Sensory system;Endocrine and metabolic diseases;Immune system;Substance dependence;Nervous system	ko04024//cAMP signaling pathway;ko05034//Alcoholism;ko05168//Herpes simplex infection;ko05205//Proteoglycans in cancer;ko04810//Regulation of actin cytoskeleton;ko04910//Insulin signaling pathway;ko04510//Focal adhesion;ko04022//cGMP - PKG signaling pathway;ko04218//Cellular senescence;ko04921//Oxytocin signaling pathway;ko04270//Vascular smooth muscle contraction;ko04114//Oocyte meiosis;ko04261/…	K06269;K06269;K06269;K06269;K06269;K06269;K06269;K06269;K06269;K06269;K06269;K06269;K06269;K06269;K06269;K06269;K06269;K06269;K06269;K06269;K06269	GO:0000776//kinetochore;GO:0005924//cell-substrate adherens junction;GO:0008287//protein serine/threonine phosphatase complex;GO:0016604//nuclear body;GO:0031966//mitochondrial membrane;GO:0032155//cell division site part;GO:0035097//histone methyltransferase complex;GO:0044309//neuron spine	GO:0003723//RNA binding;GO:0004721//phosphoprotein phosphatase activity;GO:0019900//kinase binding;GO:0043169//cation binding	GO:0000087//mitotic M phase;GO:0000278//mitotic cell cycle;GO:0006073//cellular glucan metabolic process;GO:0006470//protein dephosphorylation;GO:0006641//triglyceride metabolic process;GO:0006913//nucleocytoplasmic transport;GO:0007623//circadian rhythm;GO:0009648//photoperiodism;GO:0017015//regulation of transforming growth factor beta receptor signaling pathway;GO:0030154//cell differentiation…
ncbi_111055082	to	protein takeout-like [Nilaparvata lugens]	-	-	-	-	-	-	-
ncbi_111055124	gefJ	ras guanine nucleotide exchange factor e [Lasius niger]	-	-	-	-	-	-	-
ncbi_111055154	--	uncharacterized protein LOC111055154 [Nilaparvata lugens]	-	-	-	-	-	-	-
ncbi_111055171	GALM	aldose 1-epimerase-like [Nilaparvata lugens]	Metabolism;Metabolism;Metabolism	Global and overview maps;Carbohydrate metabolism;Carbohydrate metabolism	ko01100//Metabolic pathways;ko00010//Glycolysis / Gluconeogenesis;ko00052//Galactose metabolism	K01785;K01785;K01785	-	-	-
ncbi_111055247	foxn3	forkhead box protein N3-like, partial [Nilaparvata lugens]	-	-	-	-	-	-	-
ncbi_111055257	SLC7A5	large neutral amino acids transporter small subunit 1 [Nilaparvata lugens]	Environmental Information Processing;Human Diseases	Signal transduction;Cancers	ko04150//mTOR signaling pathway;ko05230//Central carbon metabolism in cancer	K13780;K13780	GO:0031988//membrane-bounded vesicle;GO:0043232//intracellular non-membrane-bounded organelle;GO:0044425//membrane part	GO:0003823//antigen binding;GO:0015171//amino acid transmembrane transporter activity	GO:0002376//immune system process;GO:0007599//hemostasis;GO:0009620//response to fungus;GO:0015820//leucine transport;GO:0019752//carboxylic acid metabolic process;GO:0044767//single-organism developmental process;GO:0055085//transmembrane transport
ncbi_111055280	--	myosin-9-like isoform X2 [Zootermopsis nevadensis]	-	-	-	-	-	-	-
ncbi_111055340	SF1	splicing factor 1-like [Nilaparvata lugens]	-	-	-	-	-	GO:0003676//nucleic acid binding;GO:0046914//transition metal ion binding	-
ncbi_111055358	acp4	prostatic acid phosphatase-like isoform X1 [Sogatella furcifera]	-	-	-	-	-	-	GO:0006897//endocytosis
ncbi_111055387	XDH	rosy [Limnogonus franciscanus]	Metabolism;Metabolism;Cellular Processes;Metabolism;Metabolism	Global and overview maps;Nucleotide metabolism;Transport and catabolism;Xenobiotics biodegradation and metabolism;Biosynthesis of other secondary metabolites	ko01100//Metabolic pathways;ko00230//Purine metabolism;ko04146//Peroxisome;ko00983//Drug metabolism - other enzymes;ko00232//Caffeine metabolism	K00106;K00106;K00106;K00106;K00106	GO:0042579//microbody;GO:0043234//protein complex	GO:0000166//nucleotide binding;GO:0016614//oxidoreductase activity, acting on CH-OH group of donors;GO:0016726//oxidoreductase activity, acting on CH or CH2 groups, NAD or NADP as acceptor;GO:0046914//transition metal ion binding;GO:0050662//coenzyme binding;GO:0051536//iron-sulfur cluster binding	GO:0006145//purine nucleobase catabolic process;GO:0006586//indolalkylamine metabolic process;GO:0006644//phospholipid metabolic process;GO:0009064//glutamine family amino acid metabolic process;GO:0010259//multicellular organism aging
ncbi_111055398	--	GD25283 [Drosophila simulans]	-	-	-	-	-	-	-
ncbi_111055399	TUBA8	tubulin alpha-8 chain-like [Nilaparvata lugens]	Human Diseases;Human Diseases;Human Diseases;Cellular Processes;Cellular Processes;Cellular Processes;Cellular Processes	Neurodegenerative diseases;Neurodegenerative diseases;Infectious diseases;Transport and catabolism;Cellular community - eukaryotes;Cell growth and death;Cellular community - eukaryotes	ko05016//Huntington disease;ko05010//Alzheimer disease;ko05130//Pathogenic Escherichia coli infection;ko04145//Phagosome;ko04530//Tight junction;ko04210//Apoptosis;ko04540//Gap junction	K07374;K07374;K07374;K07374;K07374;K07374;K07374	GO:0015630//microtubule cytoskeleton;GO:0032991//macromolecular complex	GO:0005198//structural molecule activity;GO:0017111//nucleoside-triphosphatase activity;GO:0032550//purine ribonucleoside binding	GO:0043623//cellular protein complex assembly;GO:0044763//single-organism cellular process
ncbi_111055477	--	transcription factor Adf-1-like [Sipha flava]	-	-	-	-	-	-	-
ncbi_111055510	--	uncharacterized protein LOC111055510 [Nilaparvata lugens]	-	-	-	-	-	-	-
ncbi_111055591	--	uncharacterized protein LOC111055591 [Nilaparvata lugens]	-	-	-	-	-	-	-
ncbi_111055593	--	uncharacterized protein LOC111055593 [Nilaparvata lugens]	-	-	-	-	-	-	-
ncbi_111055620	--	PREDICTED: tripartite motif-containing protein 2-like isoform X1 [Bemisia tabaci]	-	-	-	-	-	GO:0046872//metal ion binding	-
ncbi_111055650	--	uncharacterized protein LOC111055650 isoform X1 [Nilaparvata lugens]	-	-	-	-	-	-	-
ncbi_111055669	Sb	trithorax group protein osa-like [Nilaparvata lugens]	-	-	-	-	-	-	-
ncbi_111055681	Iqub	IQ and ubiquitin-like domain-containing protein [Nilaparvata lugens]	-	-	-	-	-	-	-
ncbi_111055754	Atrnl1	LOW QUALITY PROTEIN: attractin [Nilaparvata lugens]	-	-	-	-	GO:0016020//membrane	-	GO:0008038//neuron recognition
ncbi_111055838	Lip1	gastric triacylglycerol lipase-like [Nilaparvata lugens]	Cellular Processes;Organismal Systems;Metabolism	Transport and catabolism;Digestive system;Lipid metabolism	ko04142//Lysosome;ko04979//Cholesterol metabolism;ko00100//Steroid biosynthesis	K01052;K01052;K01052	-	-	-
ncbi_111055965	--	uncharacterized protein LOC111055965 [Nilaparvata lugens]	-	-	-	-	-	-	-
ncbi_111056001	DNMT	DNA (cytosine-5)-methyltransferase PliMCI-like [Nilaparvata lugens]	Metabolism;Human Diseases;Metabolism	Global and overview maps;Cancers;Amino acid metabolism	ko01100//Metabolic pathways;ko05206//MicroRNAs in cancer;ko00270//Cysteine and methionine metabolism	K00558;K00558;K00558	GO:0044427//chromosomal part	GO:0003676//nucleic acid binding;GO:0008168//methyltransferase activity;GO:0046872//metal ion binding	GO:0001889//liver development;GO:0003407//neural retina development;GO:0006306//DNA methylation;GO:0006355//regulation of transcription, DNA-templated;GO:0009653//anatomical structure morphogenesis;GO:0010629//negative regulation of gene expression;GO:0031324//negative regulation of cellular metabolic process;GO:0034968//histone lysine methylation;GO:0035295//tube development;GO:0051052//regulati…
ncbi_111056011	ATP6V1FNB	protein ATP6V1FNB [Thamnophis elegans]	-	-	-	-	-	-	-
ncbi_111056064	--	RNA-binding protein cabeza-like [Nilaparvata lugens]	-	-	-	-	-	-	-
ncbi_111056144	--	glycine-rich cell wall structural protein 1.8-like, partial [Nilaparvata lugens]	-	-	-	-	-	-	-
ncbi_111056153	Nt5e	apyrase-like [Nilaparvata lugens]	-	-	-	-	-	GO:0008252//nucleotidase activity;GO:0016462//pyrophosphatase activity	-
ncbi_111056164	--	uncharacterized protein LOC111056164 [Nilaparvata lugens]	-	-	-	-	-	-	-
ncbi_111056180	--	dopamine N-acetyltransferase [Frankliniella occidentalis]	-	-	-	-	-	-	-
ncbi_111056195	--	nuclear pore complex protein DDB_G0274915-like [Nilaparvata lugens]	-	-	-	-	-	-	-
ncbi_111056257	su(f)	protein suppressor of forked [Nilaparvata lugens]	Genetic Information Processing	Translation	ko03015//mRNA surveillance pathway	K14408	GO:0005849//mRNA cleavage factor complex;GO:0016020//membrane	-	GO:0006396//RNA processing;GO:0051353//positive regulation of oxidoreductase activity
ncbi_111056297	4CL1	4-coumarate--CoA ligase 1-like isoform X1 [Nilaparvata lugens]	Metabolism;Metabolism	Global and overview maps;Metabolism of cofactors and vitamins	ko01100//Metabolic pathways;ko00130//Ubiquinone and other terpenoid-quinone biosynthesis	K01904;K01904	-	-	GO:0006631//fatty acid metabolic process;GO:0006637//acyl-CoA metabolic process;GO:0006641//triglyceride metabolic process;GO:0009968//negative regulation of signal transduction
ncbi_111056365	--	O-acyltransferase like protein-like [Nilaparvata lugens]	-	-	-	-	-	-	-
ncbi_111056397	--	uncharacterized protein LOC111053286 [Nilaparvata lugens]	-	-	-	-	-	-	-
ncbi_111056407	--	gastrula zinc finger protein XlCGF57.1-like [Nilaparvata lugens]	-	-	-	-	-	-	-
ncbi_111056511	--	homeobox protein engrailed-1-like [Nilaparvata lugens]	-	-	-	-	-	-	-
ncbi_111056558	SNAP29	synaptosomal-associated protein 29-like [Nilaparvata lugens]	Cellular Processes;Genetic Information Processing	Transport and catabolism;Folding, sorting and degradation	ko04140//Autophagy - animal;ko04130//SNARE interactions in vesicular transport	K08509;K08509	GO:0043234//protein complex	GO:0005515//protein binding	GO:0007033//vacuole organization;GO:0048284//organelle fusion
ncbi_111056596	--	Asparaginase domain containing protein [Asbolus verrucosus]	-	-	-	-	-	-	-
ncbi_111056673	trmt12	tRNA wybutosine-synthesizing protein 2 homolog [Nilaparvata lugens]	-	-	-	-	-	-	-
ncbi_111056702	--	uncharacterized protein LOC111056702 [Nilaparvata lugens]	-	-	-	-	-	-	-
ncbi_111056740	Cdc14a	dual specificity protein phosphatase CDC14A-like [Nilaparvata lugens]	Cellular Processes	Cell growth and death	ko04110//Cell cycle	K06639	GO:0015630//microtubule cytoskeleton;GO:0031981//nuclear lumen;GO:0044430//cytoskeletal part	GO:0016791//phosphatase activity	GO:0006464//cellular protein modification process;GO:0016311//dephosphorylation
ncbi_111056784	--	neurofilament medium polypeptide-like [Nilaparvata lugens]	-	-	-	-	-	-	-
ncbi_111056891	TUBB4B	seminal fluid protein [Nilaparvata lugens]	Human Diseases;Human Diseases;Human Diseases;Cellular Processes;Cellular Processes	Neurodegenerative diseases;Neurodegenerative diseases;Infectious diseases;Transport and catabolism;Cellular community - eukaryotes	ko05016//Huntington disease;ko05010//Alzheimer disease;ko05130//Pathogenic Escherichia coli infection;ko04145//Phagosome;ko04540//Gap junction	K07375;K07375;K07375;K07375;K07375	GO:0015630//microtubule cytoskeleton;GO:0032991//macromolecular complex	GO:0005198//structural molecule activity;GO:0017111//nucleoside-triphosphatase activity;GO:0032550//purine ribonucleoside binding	GO:0043623//cellular protein complex assembly;GO:0044763//single-organism cellular process
ncbi_111056976	AK7	adenylate kinase 7-like [Nilaparvata lugens]	Metabolism;Metabolism;Metabolism	Global and overview maps;Nucleotide metabolism;Metabolism of cofactors and vitamins	ko01100//Metabolic pathways;ko00230//Purine metabolism;ko00730//Thiamine metabolism	K00939;K00939;K00939	-	GO:0016301//kinase activity	GO:0009987//cellular process;GO:0044699//single-organism process
ncbi_111056993	Arfip2	arfaptin-2 [Nilaparvata lugens]	-	-	-	-	GO:0000139//Golgi membrane;GO:0031984//organelle subcompartment	GO:0008092//cytoskeletal protein binding;GO:1901981//phosphatidylinositol phosphate binding	GO:0008582//regulation of synaptic growth at neuromuscular junction;GO:0030534//adult behavior
ncbi_111057006	--	osiris 18 precursor [Bombyx mori]	-	-	-	-	-	-	-
ncbi_111057031	wdhd1	WD repeat and HMG-box DNA-binding protein 1 [Nilaparvata lugens]	-	-	-	-	-	GO:0005488//binding	-
ncbi_111057045	Tret1	sugar transporter [Nilaparvata lugens]	-	-	-	-	-	-	-
ncbi_111057162	--	polymerase delta-interacting protein 2-like [Nilaparvata lugens]	-	-	-	-	-	-	-
ncbi_111057397	Pgi	glucose-6-phosphate isomerase-like [Nilaparvata lugens]	Metabolism;Metabolism;Metabolism;Metabolism;Metabolism;Metabolism	Global and overview maps;Global and overview maps;Carbohydrate metabolism;Carbohydrate metabolism;Carbohydrate metabolism;Carbohydrate metabolism	ko01100//Metabolic pathways;ko01200//Carbon metabolism;ko00010//Glycolysis / Gluconeogenesis;ko00520//Amino sugar and nucleotide sugar metabolism;ko00030//Pentose phosphate pathway;ko00500//Starch and sucrose metabolism	K01810;K01810;K01810;K01810;K01810;K01810	-	GO:0003824//catalytic activity	GO:0006006//glucose metabolic process;GO:0006090//pyruvate metabolic process
ncbi_111057432	en	homeobox protein engrailed-1-B-like [Nilaparvata lugens]	Environmental Information Processing	Signal transduction	ko04341//Hedgehog signaling pathway - fly	K09319	GO:0043231//intracellular membrane-bounded organelle	GO:0003677//DNA binding	GO:0007365//periodic partitioning;GO:0010468//regulation of gene expression
ncbi_111057437	MAN2A1	alpha-mannosidase 2-like [Nilaparvata lugens]	Metabolism	Glycan biosynthesis and metabolism	ko00511//Other glycan degradation	K01191	GO:0044464//cell part	GO:0015924//mannosyl-oligosaccharide mannosidase activity	GO:0006464//cellular protein modification process;GO:0009058//biosynthetic process;GO:0044723//single-organism carbohydrate metabolic process
ncbi_111057531	Ncapd3	condensin-2 complex subunit D3-like [Nilaparvata lugens]	-	-	-	-	-	-	-
ncbi_111057609	Samtor	probable methyltransferase BMT2 homolog [Nilaparvata lugens]	-	-	-	-	-	-	-
ncbi_111057656	pycr3	pyrroline-5-carboxylate reductase-like isoform X1 [Nilaparvata lugens]	Metabolism;Metabolism;Metabolism	Global and overview maps;Global and overview maps;Amino acid metabolism	ko01100//Metabolic pathways;ko01230//Biosynthesis of amino acids;ko00330//Arginine and proline metabolism	K00286;K00286;K00286	-	-	GO:0044710//single-organism metabolic process
ncbi_111057664	Mmp10	stromelysin-2-like [Nilaparvata lugens]	Organismal Systems;Organismal Systems;Environmental Information Processing	Endocrine system;Endocrine system;Signal transduction	ko04912//GnRH signaling pathway;ko04928//Parathyroid hormone synthesis, secretion and action;ko04668//TNF signaling pathway	K07763;K07763;K07763	-	GO:0046914//transition metal ion binding;GO:0070011//peptidase activity, acting on L-amino acid peptides	GO:0019538//protein metabolic process
ncbi_111057689	--	-	-	-	-	-	-	-	-
ncbi_111057722	--	PREDICTED: MORC family CW-type zinc finger protein 3-like isoform X1 [Salmo salar]	-	-	-	-	-	-	-
ncbi_111057825	UGT2B9	UDP-glucuronosyltransferase 1-2-like isoform X1 [Nilaparvata lugens]	Metabolism;Metabolism;Metabolism;Metabolism;Metabolism;Human Diseases;Metabolism;Metabolism;Metabolism;Metabolism	Global and overview maps;Xenobiotics biodegradation and metabolism;Carbohydrate metabolism;Metabolism of cofactors and vitamins;Carbohydrate metabolism;Cancers;Metabolism of cofactors and vitamins;Xenobiotics biodegradation and metabolism;Xenobiotics biodegradation and metabolism;Lipid metabolism	ko01100//Metabolic pathways;ko00983//Drug metabolism - other enzymes;ko00040//Pentose and glucuronate interconversions;ko00860//Porphyrin and chlorophyll metabolism;ko00053//Ascorbate and aldarate metabolism;ko05204//Chemical carcinogenesis;ko00830//Retinol metabolism;ko00980//Metabolism of xenobiotics by cytochrome P450;ko00982//Drug metabolism - cytochrome P450;ko00140//Steroid hormone biosynth…	K00699;K00699;K00699;K00699;K00699;K00699;K00699;K00699;K00699;K00699	-	-	-
ncbi_111057877	CYP4C1	cytochrome P450 CYP4C62v2 [Nilaparvata lugens]	-	-	-	-	GO:0031090//organelle membrane;GO:0043231//intracellular membrane-bounded organelle	GO:0016712//oxidoreductase activity, acting on paired donors, with incorporation or reduction of molecular oxygen, reduced flavin or flavoprotein as one donor, and incorporation of one atom of oxygen;GO:0046906//tetrapyrrole binding;GO:0046914//transition metal ion binding	GO:0044710//single-organism metabolic process
ncbi_111057905	BRAFLDRAFT_56888	alpha-L-fucosidase [Nilaparvata lugens]	Cellular Processes;Metabolism	Transport and catabolism;Glycan biosynthesis and metabolism	ko04142//Lysosome;ko00511//Other glycan degradation	K01206;K01206	-	GO:0016787//hydrolase activity	GO:0005975//carbohydrate metabolic process
ncbi_111057950	--	uncharacterized protein LOC111057950 [Nilaparvata lugens]	-	-	-	-	-	-	-
ncbi_111057975	RRAGA	ras-related GTP-binding protein A-like [Nilaparvata lugens]	Human Diseases;Cellular Processes;Environmental Information Processing	Infectious diseases;Transport and catabolism;Signal transduction	ko05131//Shigellosis;ko04140//Autophagy - animal;ko04150//mTOR signaling pathway	K16185;K16185;K16185	-	-	-
ncbi_111058034	--	mitochondrial import receptor subunit TOM22 homolog [Nilaparvata lugens]	-	-	-	-	-	-	-
ncbi_111058076	--	uncharacterized protein LOC111058076 [Nilaparvata lugens]	-	-	-	-	-	-	-
ncbi_111058094	--	cilia- and flagella-associated protein 70-like [Nilaparvata lugens]	-	-	-	-	-	-	-
ncbi_111058112	NOS1AP	capon-like protein [Nilaparvata lugens]	Organismal Systems	Environmental adaptation	ko04713//Circadian entrainment	K16513	-	-	-
ncbi_111058179	Tret1	sugar transporter [Nilaparvata lugens]	-	-	-	-	-	-	-
ncbi_111058207	SLC7A5	Y+L amino acid transporter 2 [Nilaparvata lugens]	-	-	-	-	GO:0031224//intrinsic component of membrane	GO:0000166//nucleotide binding;GO:0046943//carboxylic acid transmembrane transporter activity	GO:0006865//amino acid transport;GO:0044710//single-organism metabolic process
ncbi_111058316	B3galt4	N-acetyllactosaminide beta-1,3-N-acetylglucosaminyltransferase 2-like [Nilaparvata lugens]	Metabolism;Metabolism	Global and overview maps;Glycan biosynthesis and metabolism	ko01100//Metabolic pathways;ko00601//Glycosphingolipid biosynthesis - lacto and neolacto series	K07819;K07819	GO:0043231//intracellular membrane-bounded organelle	GO:0008378//galactosyltransferase activity	-
ncbi_111058429	ARSB	arylsulfatase B-like [Nilaparvata lugens]	Metabolism;Cellular Processes;Metabolism	Global and overview maps;Transport and catabolism;Glycan biosynthesis and metabolism	ko01100//Metabolic pathways;ko04142//Lysosome;ko00531//Glycosaminoglycan degradation	K01135;K01135;K01135	-	GO:0016787//hydrolase activity	-
ncbi_111058481	doxa-1	dual oxidase maturation factor 1-like [Nilaparvata lugens]	-	-	-	-	GO:0044425//membrane part;GO:0044464//cell part	GO:0005488//binding	GO:0006950//response to stress;GO:0007613//memory;GO:0008104//protein localization;GO:0008306//associative learning
ncbi_111058532	--	probable serine/threonine-protein kinase DDB_G0280133 isoform X1 [Nilaparvata lugens]	-	-	-	-	-	GO:0005214//structural constituent of chitin-based cuticle	GO:0042335//cuticle development
ncbi_111058575	CYP2G1	cytochrome P450 CYP425A1 [Nilaparvata lugens]	-	-	-	-	-	GO:0016709//oxidoreductase activity, acting on paired donors, with incorporation or reduction of molecular oxygen, NAD(P)H as one donor, and incorporation of one atom of oxygen	-
ncbi_111058611	PNLIP	pancreatic triacylglycerol lipase [Nilaparvata lugens]	Metabolism;Organismal Systems;Metabolism;Organismal Systems;Organismal Systems	Global and overview maps;Digestive system;Lipid metabolism;Digestive system;Digestive system	ko01100//Metabolic pathways;ko04972//Pancreatic secretion;ko00561//Glycerolipid metabolism;ko04975//Fat digestion and absorption;ko04977//Vitamin digestion and absorption	K14073;K14073;K14073;K14073;K14073	-	-	-
ncbi_111058626	IST1	IST1 homolog [Nilaparvata lugens]	Cellular Processes	Transport and catabolism	ko04144//Endocytosis	K19476	-	-	-
ncbi_111058682	MPC2	mitochondrial pyruvate carrier 2-like [Nilaparvata lugens]	-	-	-	-	-	-	GO:0006839//mitochondrial transport
ncbi_111058755	AAEL008004	fatty acid elongase [Nilaparvata lugens]	Metabolism;Metabolism;Metabolism;Metabolism	Global and overview maps;Global and overview maps;Lipid metabolism;Lipid metabolism	ko01100//Metabolic pathways;ko01212//Fatty acid metabolism;ko01040//Biosynthesis of unsaturated fatty acids;ko00062//Fatty acid elongation	K10250;K10250;K10250;K10250	GO:0016020//membrane	-	GO:0006631//fatty acid metabolic process
ncbi_111058761	--	uncharacterized protein LOC111058761 [Nilaparvata lugens]	-	-	-	-	-	-	-
ncbi_111058784	Spag6	sperm-associated antigen 6-like [Nilaparvata lugens]	-	-	-	-	GO:0005856//cytoskeleton;GO:0043231//intracellular membrane-bounded organelle;GO:0044441//ciliary part	-	GO:0007281//germ cell development;GO:0007420//brain development;GO:0048870//cell motility
ncbi_111058812	CG4666	protein THEM6-like, partial [Nilaparvata lugens]	-	-	-	-	-	-	-
ncbi_111058864	galM	aldose 1-epimerase-like [Nilaparvata lugens]	Metabolism;Metabolism;Metabolism	Global and overview maps;Carbohydrate metabolism;Carbohydrate metabolism	ko01100//Metabolic pathways;ko00010//Glycolysis / Gluconeogenesis;ko00052//Galactose metabolism	K01785;K01785;K01785	-	-	-
ncbi_111058915	--	uncharacterized protein LOC111047476 [Nilaparvata lugens]	-	-	-	-	-	-	-
ncbi_111059089	Tret1	facilitated trehalose transporter Tret1-like isoform X1 [Nilaparvata lugens]	-	-	-	-	-	-	-
ncbi_111059217	--	seminal fluid protein [Nilaparvata lugens]	-	-	-	-	-	-	-
ncbi_111059222	gudu	armadillo repeat-containing protein 4-like [Nilaparvata lugens]	-	-	-	-	-	-	-
ncbi_111059261	--	dentin sialophosphoprotein-like isoform X1 [Nilaparvata lugens]	-	-	-	-	-	-	-
ncbi_111059291	tipE	protein tipE, partial [Nilaparvata lugens]	-	-	-	-	-	GO:0016247//channel regulator activity	GO:0006814//sodium ion transport
ncbi_111059404	Hsp83	heat shock protein 83 [Nilaparvata lugens]	Human Diseases;Genetic Information Processing;Human Diseases;Environmental Information Processing;Organismal Systems;Human Diseases;Cellular Processes;Organismal Systems;Organismal Systems;Human Diseases;Organismal Systems;Organismal Systems;Organismal Systems	Cancers;Folding, sorting and degradation;Infectious diseases;Signal transduction;Endocrine system;Cardiovascular diseases;Cell growth and death;Endocrine system;Immune system;Cancers;Immune system;Immune system;Immune system	ko05200//Pathways in cancer;ko04141//Protein processing in endoplasmic reticulum;ko05132//Salmonella infection;ko04151//PI3K-Akt signaling pathway;ko04915//Estrogen signaling pathway;ko05418//Fluid shear stress and atherosclerosis;ko04217//Necroptosis;ko04914//Progesterone-mediated oocyte maturation;ko04621//NOD-like receptor signaling pathway;ko05215//Prostate cancer;ko04612//Antigen processing …	K04079;K04079;K04079;K04079;K04079;K04079;K04079;K04079;K04079;K04079;K04079;K04079;K04079	GO:0005700//polytene chromosome;GO:0005815//microtubule organizing center;GO:0016020//membrane;GO:0044444//cytoplasmic part	GO:0005515//protein binding;GO:0016887//ATPase activity;GO:0032550//purine ribonucleoside binding	GO:0001752//compound eye photoreceptor fate commitment;GO:0007051//spindle organization;GO:0007169//transmembrane receptor protein tyrosine kinase signaling pathway;GO:0007316//pole plasm RNA localization;GO:0008283//cell proliferation;GO:0009409//response to cold;GO:0010528//regulation of transposition;GO:0022604//regulation of cell morphogenesis;GO:0030036//actin cytoskeleton organization;GO:00…
ncbi_111059597	--	hypothetical protein B7P43_G13750 [Cryptotermes secundus]	-	-	-	-	-	-	-
ncbi_111059698	SDR16C6	17-beta-hydroxysteroid dehydrogenase 13-like [Nilaparvata lugens]	Metabolism	Metabolism of cofactors and vitamins	ko00830//Retinol metabolism	K15734	-	-	-
ncbi_111059739	--	PREDICTED: histone H2B.v2 [Polistes dominula]	-	-	-	-	-	GO:0031267//small GTPase binding;GO:0046983//protein dimerization activity	GO:0009967//positive regulation of signal transduction;GO:0042051//compound eye photoreceptor development;GO:0042058//regulation of epidermal growth factor receptor signaling pathway
ncbi_111059786	--	protein diaphanous homolog 3-like isoform X4 [Athalia rosae]	-	-	-	-	-	-	-
ncbi_111059842	LAP3	cytosol aminopeptidase-like [Nilaparvata lugens]	Metabolism;Metabolism;Metabolism	Global and overview maps;Metabolism of other amino acids;Amino acid metabolism	ko01100//Metabolic pathways;ko00480//Glutathione metabolism;ko00330//Arginine and proline metabolism	K11142;K11142;K11142	-	GO:0016787//hydrolase activity	GO:0007420//brain development
ncbi_111059885	Kif3b	kinesin-II 95 kDa subunit [Halyomorpha halys]	-	-	-	-	-	-	-
ncbi_111059899	--	hypothetical protein LSTR_LSTR011800 [Laodelphax striatellus]	-	-	-	-	-	-	-
ncbi_111059918	--	AGAP008310-PA [Anopheles gambiae str. PEST] [Anopheles gambiae]	-	-	-	-	GO:0016020//membrane;GO:0033267//axon part	-	GO:0007268//synaptic transmission;GO:0045161//neuronal ion channel clustering
ncbi_111059935	NAGA	alpha-N-acetylgalactosaminidase isoform X1 [Nilaparvata lugens]	Metabolism;Cellular Processes;Metabolism	Global and overview maps;Transport and catabolism;Glycan biosynthesis and metabolism	ko01100//Metabolic pathways;ko04142//Lysosome;ko00603//Glycosphingolipid biosynthesis - globo and isoglobo series	K01204;K01204;K01204	-	GO:0015929//hexosaminidase activity	GO:0044238//primary metabolic process;GO:0071704//organic substance metabolic process
ncbi_111059937	FucTA	glycoprotein 3-alpha-L-fucosyltransferase A-like, partial [Nilaparvata lugens]	Metabolism;Metabolism	Global and overview maps;Glycan biosynthesis and metabolism	ko01100//Metabolic pathways;ko00513//Various types of N-glycan biosynthesis	K00753;K00753	GO:0016020//membrane	GO:0016757//transferase activity, transferring glycosyl groups	GO:0044238//primary metabolic process;GO:0044710//single-organism metabolic process;GO:0044763//single-organism cellular process;GO:0050794//regulation of cellular process;GO:0071704//organic substance metabolic process
ncbi_111059957	Smox	peroxisomal N(1)-acetyl-spermine/spermidine oxidase-like [Nilaparvata lugens]	Metabolism;Metabolism;Metabolism	Global and overview maps;Amino acid metabolism;Metabolism of other amino acids	ko01100//Metabolic pathways;ko00330//Arginine and proline metabolism;ko00410//beta-Alanine metabolism	K12259;K12259;K12259	-	-	-
ncbi_111059990	--	PREDICTED: peptidyl-prolyl cis-trans isomerase CYP95-like, partial [Neodiprion lecontei]	-	-	-	-	-	-	-
ncbi_111060035	Raf	raf homolog serine/threonine-protein kinase phl-like [Nilaparvata lugens]	Human Diseases;Human Diseases;Environmental Information Processing;Environmental Information Processing;Human Diseases;Human Diseases;Environmental Information Processing;Environmental Information Processing;Human Diseases;Cellular Processes;Organismal Systems;Cellular Processes;Environmental Information Processing;Organismal Systems;Human Diseases;Organismal Systems;Environmental Information Pro…	Neurodegenerative diseases;Cancers;Signal transduction;Signal transduction;Substance dependence;Cancers;Signal transduction;Signal transduction;Endocrine and metabolic diseases;Cell motility;Endocrine system;Cellular community - eukaryotes;Signal transduction;Circulatory system;Cancers;Immune system;Signal transduction;Nervous system;Endocrine system;Infectious diseases;Cell growth and death;Endo…	ko05010//Alzheimer disease;ko05200//Pathways in cancer;ko04024//cAMP signaling pathway;ko04010//MAPK signaling pathway;ko05034//Alcoholism;ko05205//Proteoglycans in cancer;ko04150//mTOR signaling pathway;ko04013//MAPK signaling pathway - fly;ko04934//Cushing syndrome;ko04810//Regulation of actin cytoskeleton;ko04910//Insulin signaling pathway;ko04510//Focal adhesion;ko04015//Rap1 signaling pathwa…	K04365;K04365;K04365;K04365;K04365;K04365;K04365;K04365;K04365;K04365;K04365;K04365;K04365;K04365;K04365;K04365;K04365;K04365;K04365;K04365;K04365;K04365;K04365;K04365;K04365;K04365;K04365;K04365;K04365;K04365;K04365;K04365;K04365;K04365;K04365;K04365;K04365;K04365;K04365;K04365;K04365;K04365;K04365;K04365;K04365	-	GO:0004672//protein kinase activity;GO:0043167//ion binding	GO:0006468//protein phosphorylation;GO:0007165//signal transduction
ncbi_111060097	LCC5	multicopper oxidase 1 [Nilaparvata lugens]	-	-	-	-	-	GO:0005488//binding	-
ncbi_111060134	BUB1	mitotic checkpoint serine/threonine-protein kinase BUB1-like [Nilaparvata lugens]	Cellular Processes;Cellular Processes;Organismal Systems	Cell growth and death;Cell growth and death;Endocrine system	ko04110//Cell cycle;ko04114//Oocyte meiosis;ko04914//Progesterone-mediated oocyte maturation	K02178;K02178;K02178	-	GO:0016301//kinase activity	GO:0044237//cellular metabolic process;GO:0071173//spindle assembly checkpoint
ncbi_111060179	Cad89D	cadherin-like protein-7, partial [Nilaparvata lugens]	-	-	-	-	GO:0016020//membrane	-	-
ncbi_111060185	LARS2	LOW QUALITY PROTEIN: probable leucine--tRNA ligase, mitochondrial, partial [Nilaparvata lugens]	Genetic Information Processing	Translation	ko00970//Aminoacyl-tRNA biosynthesis	K01869	-	GO:0016874//ligase activity	GO:0006412//translation
ncbi_111060186	JUN	Jun [Nilaparvata lugens]	Human Diseases;Human Diseases;Environmental Information Processing;Environmental Information Processing;Human Diseases;Human Diseases;Human Diseases;Environmental Information Processing;Human Diseases;Human Diseases;Environmental Information Processing;Cellular Processes;Human Diseases;Cellular Processes;Organismal Systems;Cellular Processes;Organismal Systems;Organismal Systems;Human Diseases;Or…	Cancers;Infectious diseases;Signal transduction;Signal transduction;Infectious diseases;Cancers;Infectious diseases;Signal transduction;Infectious diseases;Endocrine and metabolic diseases;Signal transduction;Cellular community - eukaryotes;Infectious disease: viral;Cellular community - eukaryotes;Endocrine system;Cell growth and death;Endocrine system;Endocrine system;Infectious diseases;Endocri…	ko05200//Pathways in cancer;ko05131//Shigellosis;ko04024//cAMP signaling pathway;ko04010//MAPK signaling pathway;ko05132//Salmonella infection;ko05203//Viral carcinogenesis;ko05166//HTLV-I infection;ko04013//MAPK signaling pathway - fly;ko05130//Pathogenic Escherichia coli infection;ko04932//Non-alcoholic fatty liver disease (NAFLD);ko04310//Wnt signaling pathway;ko04510//Focal adhesion;ko05170//…	K04448;K04448;K04448;K04448;K04448;K04448;K04448;K04448;K04448;K04448;K04448;K04448;K04448;K04448;K04448;K04448;K04448;K04448;K04448;K04448;K04448;K04448;K04448;K04448;K04448;K04448;K04448;K04448;K04448;K04448;K04448;K04448;K04448;K04448;K04448;K04448;K04448;K04448;K04448;K04448;K04448;K04448;K04448;K04448;K04448;K04448;K04448;K04448;K04448;K04448;K04448;K04448;K04448;K04448;K04448	-	-	-
ncbi_111060215	--	ERI1 exoribonuclease 3, partial [Araneus ventricosus]	-	-	-	-	-	-	-
ncbi_111060231	rnf168	E3 ubiquitin-protein ligase rnf168-like [Nilaparvata lugens]	-	-	-	-	GO:0043229//intracellular organelle	GO:0003824//catalytic activity;GO:0043130//ubiquitin binding	GO:0000209//protein polyubiquitination;GO:0006281//DNA repair;GO:0019219//regulation of nucleobase-containing compound metabolic process;GO:0033522//histone H2A ubiquitination;GO:0060255//regulation of macromolecule metabolic process
ncbi_111060240	CFAP45	cilia- and flagella-associated protein 45-like [Nilaparvata lugens]	-	-	-	-	-	-	-
ncbi_111060247	--	kelch-like protein 26 isoform X3 [Nilaparvata lugens]	-	-	-	-	-	-	-
ncbi_111060253	--	AGAP009812-PA [Anopheles gambiae str. PEST] [Anopheles gambiae]	-	-	-	-	-	-	-
ncbi_111060279	--	uncharacterized protein LOC111060279, partial [Nilaparvata lugens]	-	-	-	-	-	-	-
ncbi_111060311	CRAT	PREDICTED: carnitine O-acetyltransferase-like, partial [Plutella xylostella]	Cellular Processes	Transport and catabolism	ko04146//Peroxisome	K00624	GO:0043231//intracellular membrane-bounded organelle;GO:0044444//cytoplasmic part	-	GO:0044710//single-organism metabolic process;GO:0071704//organic substance metabolic process
ncbi_111060316	Set	protein SET-like [Nilaparvata lugens]	-	-	-	-	GO:0031981//nuclear lumen;GO:0032991//macromolecular complex;GO:0044444//cytoplasmic part	GO:0005515//protein binding;GO:0019212//phosphatase inhibitor activity;GO:0019888//protein phosphatase regulator activity	GO:0000087//mitotic M phase;GO:0006259//DNA metabolic process;GO:0006355//regulation of transcription, DNA-templated;GO:0016482//cytoplasmic transport;GO:0031057//negative regulation of histone modification;GO:0034728//nucleosome organization;GO:0043066//negative regulation of apoptotic process
ncbi_111060342	futsch	microtubule-associated protein futsch-like, partial [Nilaparvata lugens]	-	-	-	-	GO:0015630//microtubule cytoskeleton;GO:0043005//neuron projection;GO:0043234//protein complex;GO:0044297//cell body	GO:0015631//tubulin binding	GO:0001654//eye development;GO:0008306//associative learning;GO:0010970//establishment of localization by movement along microtubule;GO:0043066//negative regulation of apoptotic process;GO:0045104//intermediate filament cytoskeleton organization;GO:0048638//regulation of developmental growth;GO:0048812//neuron projection morphogenesis;GO:0050808//synapse organization
ncbi_111060422	--	transcription factor Adf-1-like [Helicoverpa armigera]	-	-	-	-	-	-	-
ncbi_111060486	--	cingulin-like [Nilaparvata lugens]	-	-	-	-	-	-	-
ncbi_111060544	--	uncharacterized protein LOC111060544 [Nilaparvata lugens]	-	-	-	-	-	-	-
ncbi_111060553	Ermp1	endoplasmic reticulum metallopeptidase 1-like [Nilaparvata lugens]	-	-	-	-	-	-	-
ncbi_111060628	--	DUF4771 domain-containing protein [Aphis craccivora]	-	-	-	-	-	-	-
ncbi_111060684	--	-	-	-	-	-	-	-	-
ncbi_111060833	Tagln2	myophilin [Nilaparvata lugens]	-	-	-	-	-	GO:0008092//cytoskeletal protein binding;GO:0044212//transcription regulatory region DNA binding	GO:0006936//muscle contraction;GO:0009755//hormone-mediated signaling pathway
ncbi_111060859	Slc12a2	bumetanide-sensitive sodium-(potassium)-chloride cotransporter-like [Nilaparvata lugens]	Organismal Systems;Organismal Systems;Human Diseases	Digestive system;Digestive system;Infectious diseases	ko04972//Pancreatic secretion;ko04970//Salivary secretion;ko05110//Vibrio cholerae infection	K10951;K10951;K10951	GO:0016020//membrane	GO:0015377//cation:chloride symporter activity	GO:0006821//chloride transport;GO:0030001//metal ion transport;GO:0044763//single-organism cellular process
ncbi_111060878	TIM10	mitochondrial import inner membrane translocase subunit TIM10-like [Nilaparvata lugens]	-	-	-	-	-	-	-
ncbi_111060998	-	-	-	-	-	-	-	-	-
ncbi_111061086	--	hornerin-like, partial [Nilaparvata lugens]	Human Diseases;Human Diseases;Environmental Information Processing;Cellular Processes;Organismal Systems;Organismal Systems;Human Diseases;Human Diseases;Human Diseases;Environmental Information Processing	Cancers;Infectious diseases;Signal transduction;Cellular community - eukaryotes;Digestive system;Endocrine system;Endocrine and metabolic diseases;Infectious diseases;Cancers;Signaling molecules and interaction	ko05200//Pathways in cancer;ko05165//Human papillomavirus infection;ko04151//PI3K-Akt signaling pathway;ko04510//Focal adhesion;ko04974//Protein digestion and absorption;ko04926//Relaxin signaling pathway;ko04933//AGE-RAGE signaling pathway in diabetic complications;ko05146//Amoebiasis;ko05222//Small cell lung cancer;ko04512//ECM-receptor interaction	K06237;K06237;K06237;K06237;K06237;K06237;K06237;K06237;K06237;K06237	-	-	-
ncbi_111061101	gkap1-b	G kinase-anchoring protein 1-like [Nilaparvata lugens]	-	-	-	-	GO:0043231//intracellular membrane-bounded organelle	-	GO:0007165//signal transduction
ncbi_111061119	plk-1	serine/threonine-protein kinase PLK1-like [Nilaparvata lugens]	Cellular Processes;Cellular Processes;Environmental Information Processing;Organismal Systems	Cell growth and death;Cell growth and death;Signal transduction;Endocrine system	ko04110//Cell cycle;ko04114//Oocyte meiosis;ko04068//FoxO signaling pathway;ko04914//Progesterone-mediated oocyte maturation	K06631;K06631;K06631;K06631	GO:0005819//spindle	GO:0005488//binding;GO:0016772//transferase activity, transferring phosphorus-containing groups	GO:0006468//protein phosphorylation;GO:0007067//mitotic nuclear division;GO:0007346//regulation of mitotic cell cycle;GO:0031399//regulation of protein modification process;GO:0032270//positive regulation of cellular protein metabolic process;GO:0032434//regulation of proteasomal ubiquitin-dependent protein catabolic process;GO:0044772//mitotic cell cycle phase transition;GO:0051301//cell divisio…
ncbi_111061281	PGA	cathepsin D-like [Nilaparvata lugens]	Cellular Processes;Cellular Processes;Cellular Processes;Organismal Systems;Human Diseases;Environmental Information Processing	Transport and catabolism;Transport and catabolism;Cell growth and death;Endocrine system;Infectious diseases;Signal transduction	ko04142//Lysosome;ko04140//Autophagy - animal;ko04210//Apoptosis;ko04915//Estrogen signaling pathway;ko05152//Tuberculosis;ko04071//Sphingolipid signaling pathway	K01379;K01379;K01379;K01379;K01379;K01379	-	-	-
ncbi_111061318	pep	mitochondrial-processing peptidase subunit beta-like [Nilaparvata lugens]	-	-	-	-	-	-	-
ncbi_111061390	ift46	titin-like isoform X2 [Nilaparvata lugens]	-	-	-	-	-	-	-
ncbi_111061470	--	PREDICTED: jerky protein homolog-like [Hydra vulgaris]	-	-	-	-	-	-	-
ncbi_111061519	CG5065	Male sterility, NAD-binding,NAD(P)-binding domain,Fatty acyl-CoA reductase, C-terminal [Cinara cedri]	Cellular Processes;Organismal Systems	Transport and catabolism;Aging	ko04146//Peroxisome;ko04212//Longevity regulating pathway - worm	K13356;K13356	-	-	-
ncbi_111061525	Akap14	A-kinase anchor protein 14-like [Nilaparvata lugens]	-	-	-	-	-	-	-
ncbi_111061539	--	uncharacterized protein LOC111061539 [Nilaparvata lugens]	-	-	-	-	-	-	-
ncbi_111061661	-	-	-	-	-	-	-	-	-
ncbi_111061740	His2B	histone H2B [Nilaparvata lugens]	Human Diseases;Human Diseases;Human Diseases	Substance dependence;Cancers;Immune diseases	ko05034//Alcoholism;ko05203//Viral carcinogenesis;ko05322//Systemic lupus erythematosus	K11252;K11252;K11252	GO:0000785//chromatin;GO:0043189//H4/H2A histone acetyltransferase complex	GO:0003676//nucleic acid binding;GO:0046914//transition metal ion binding;GO:0046983//protein dimerization activity	GO:0006325//chromatin organization
ncbi_111061823	SCARB2	scavenger receptor class B member 1-like [Nilaparvata lugens]	Human Diseases;Cellular Processes;Organismal Systems;Organismal Systems;Human Diseases;Organismal Systems;Organismal Systems;Organismal Systems;Organismal Systems;Organismal Systems	Endocrine and metabolic diseases;Transport and catabolism;Endocrine system;Digestive system;Infectious diseases;Digestive system;Endocrine system;Digestive system;Digestive system;Endocrine system	ko04934//Cushing syndrome;ko04145//Phagosome;ko04925//Aldosterone synthesis and secretion;ko04976//Bile secretion;ko05160//Hepatitis C;ko04975//Fat digestion and absorption;ko04927//Cortisol synthesis and secretion;ko04977//Vitamin digestion and absorption;ko04979//Cholesterol metabolism;ko04913//Ovarian Steroidogenesis	K13885;K13885;K13885;K13885;K13885;K13885;K13885;K13885;K13885;K13885	GO:0016020//membrane	-	-
ncbi_111061930	C22orf23	UPF0193 protein EVG1 [Nilaparvata lugens]	-	-	-	-	-	-	-
ncbi_111062000	--	hypothetical protein LSTR_LSTR005100 [Laodelphax striatellus]	-	-	-	-	-	-	-
ncbi_111062201	LRRC51	leucine-rich repeat-containing protein 51-like [Nilaparvata lugens]	-	-	-	-	-	GO:0016740//transferase activity	GO:0008152//metabolic process;GO:0009987//cellular process;GO:0044699//single-organism process
ncbi_111062226	Cyp4g15	cytochrome P450 CYP4G115 [Nilaparvata lugens]	-	-	-	-	-	GO:0016713//oxidoreductase activity, acting on paired donors, with incorporation or reduction of molecular oxygen, reduced iron-sulfur protein as one donor, and incorporation of one atom of oxygen;GO:0046906//tetrapyrrole binding;GO:0046914//transition metal ion binding	GO:0008202//steroid metabolic process
ncbi_111062391	Cyp12a4	cytochrome P450 CYP419A1 [Nilaparvata lugens]	-	-	-	-	-	GO:0016491//oxidoreductase activity	-
ncbi_111062424	--	zinc finger protein 208-like [Nilaparvata lugens]	-	-	-	-	-	-	-
ncbi_111062487	--	hapless 2-like, partial [Nilaparvata lugens]	-	-	-	-	-	-	-
ncbi_111062491	GLIS2	zinc finger protein GLIS2-like isoform X1 [Nilaparvata lugens]	-	-	-	-	-	GO:0043169//cation binding	-
ncbi_111062512	--	zinc finger BED domain-containing protein 5-like [Onthophagus taurus]	-	-	-	-	-	-	-
ncbi_111062549	CDK5R1	cyclin-dependent kinase 5 activator 1 [Nilaparvata lugens]	Human Diseases;Human Diseases	Neurodegenerative diseases;Substance dependence	ko05010//Alzheimer disease;ko05030//Cocaine addiction	K11716;K11716	GO:0043005//neuron projection	-	GO:0006950//response to stress;GO:0007409//axonogenesis;GO:0044237//cellular metabolic process;GO:0071704//organic substance metabolic process
ncbi_111062619	Dhod	dihydroorotate dehydrogenase (quinone), mitochondrial [Nilaparvata lugens]	Metabolism;Metabolism	Global and overview maps;Nucleotide metabolism	ko01100//Metabolic pathways;ko00240//Pyrimidine metabolism	K00254;K00254	GO:0016020//membrane;GO:0031970//organelle envelope lumen;GO:0043231//intracellular membrane-bounded organelle	GO:0016491//oxidoreductase activity	GO:0006222//UMP biosynthetic process
ncbi_111062625	VPS33B	vacuolar protein sorting-associated protein 33B [Nilaparvata lugens]	-	-	-	-	GO:0000323//lytic vacuole;GO:0005768//endosome;GO:0030141//secretory granule;GO:0043234//protein complex	GO:0005488//binding	GO:0006810//transport;GO:0008104//protein localization;GO:0033363//secretory granule organization;GO:0051875//pigment granule localization;GO:0061024//membrane organization
ncbi_111062740	--	uncharacterized protein LOC111062740, partial [Nilaparvata lugens]	-	-	-	-	-	-	-
ncbi_111062818	HK2	hexokinase-1-like [Nilaparvata lugens]	Metabolism;Metabolism;Human Diseases;Organismal Systems;Environmental Information Processing;Metabolism;Metabolism;Human Diseases;Metabolism;Metabolism;Human Diseases;Metabolism;Organismal Systems;Metabolism	Global and overview maps;Global and overview maps;Infectious diseases;Endocrine system;Signal transduction;Carbohydrate metabolism;Carbohydrate metabolism;Cancers;Carbohydrate metabolism;Carbohydrate metabolism;Endocrine and metabolic diseases;Carbohydrate metabolism;Digestive system;Biosynthesis of other secondary metabolites	ko01100//Metabolic pathways;ko01200//Carbon metabolism;ko05131//Shigellosis;ko04910//Insulin signaling pathway;ko04066//HIF-1 signaling pathway;ko00010//Glycolysis / Gluconeogenesis;ko00520//Amino sugar and nucleotide sugar metabolism;ko05230//Central carbon metabolism in cancer;ko00052//Galactose metabolism;ko00051//Fructose and mannose metabolism;ko04930//Type II diabetes mellitus;ko00500//Star…	K00844;K00844;K00844;K00844;K00844;K00844;K00844;K00844;K00844;K00844;K00844;K00844;K00844;K00844	-	GO:0016773//phosphotransferase activity, alcohol group as acceptor;GO:0032550//purine ribonucleoside binding	GO:0006090//pyruvate metabolic process;GO:0016310//phosphorylation;GO:0044238//primary metabolic process
ncbi_111062864	CarT	organic cation transporter protein [Nilaparvata lugens]	-	-	-	-	-	-	-
ncbi_111062893	Fhod3	PREDICTED: FH1/FH2 domain-containing protein 3-like isoform X4 [Fopius arisanus]	-	-	-	-	-	-	-
ncbi_111062962	Rif1	telomere-associated protein RIF1-like [Nilaparvata lugens]	Cellular Processes	Cellular community - eukaryotes	ko04550//Signaling pathways regulating pluripotency of stem cells	K11138	GO:0016020//membrane;GO:0045120//pronucleus;GO:0098687//chromosomal region	GO:0005488//binding	GO:0044707//single-multicellular organism process;GO:0044763//single-organism cellular process
ncbi_111063136	phospho2	PREDICTED: pyridoxal phosphate phosphatase PHOSPHO2-like [Bemisia tabaci]	Metabolism;Metabolism	Global and overview maps;Metabolism of cofactors and vitamins	ko01100//Metabolic pathways;ko00750//Vitamin B6 metabolism	K13248;K13248	-	-	-
ncbi_111063151	His2B	histone H2B [Nilaparvata lugens]	Human Diseases;Human Diseases;Human Diseases	Substance dependence;Cancers;Immune diseases	ko05034//Alcoholism;ko05203//Viral carcinogenesis;ko05322//Systemic lupus erythematosus	K11252;K11252;K11252	GO:0000785//chromatin;GO:0043189//H4/H2A histone acetyltransferase complex	GO:0003676//nucleic acid binding;GO:0046914//transition metal ion binding;GO:0046983//protein dimerization activity	GO:0006325//chromatin organization
ncbi_111063158	--	insulin-like growth factor-binding protein complex acid labile subunit [Nilaparvata lugens]	-	-	-	-	-	-	-
ncbi_111063213	Tret1	facilitated trehalose transporter Tret1-like [Nilaparvata lugens]	-	-	-	-	-	-	-
ncbi_111063243	--	uncharacterized protein LOC111062693 [Nilaparvata lugens]	-	-	-	-	-	-	-
ncbi_111063278	--	MADF domain [Trinorchestia longiramus]	-	-	-	-	-	-	-
ncbi_111063320	OMA1	metalloendopeptidase OMA1, mitochondrial-like [Nilaparvata lugens]	Human Diseases	Neurodegenerative disease	ko05017//Spinocerebellar ataxia	K23010	-	GO:0016787//hydrolase activity	GO:0009987//cellular process;GO:0044238//primary metabolic process;GO:0044699//single-organism process;GO:0071704//organic substance metabolic process
ncbi_111063374	--	cilia- and flagella-associated protein 69-like [Photinus pyralis]	-	-	-	-	-	-	-
ncbi_111063394	TSSK1B	testis-specific serine/threonine-protein kinase 6-like, partial [Nilaparvata lugens]	-	-	-	-	-	GO:0004672//protein kinase activity	-
ncbi_111063609	--	DUF4485 domain-containing protein [Aphis craccivora]	-	-	-	-	-	-	-
ncbi_111063661	--	PREDICTED: basic proline-rich protein-like [Bemisia tabaci]	-	-	-	-	-	-	-
ncbi_111063742	slc39a1	zinc transporter ZIP1-like, partial [Nilaparvata lugens]	-	-	-	-	GO:0044464//cell part	-	GO:0044765//single-organism transport
ncbi_111063835	GNBP3	GRP3 [Nilaparvata lugens]	Organismal Systems	Immune system	ko04624//Toll and Imd signaling pathway	K20692	-	-	-
ncbi_111063867	--	loricrin-like [Nilaparvata lugens]	-	-	-	-	-	-	-
ncbi_111063876	--	serine/threonine-protein kinase ATR-like [Nilaparvata lugens]	-	-	-	-	-	-	-
ncbi_111063930	His2B	histone H2B [Nilaparvata lugens]	Human Diseases;Human Diseases;Human Diseases	Substance dependence;Cancers;Immune diseases	ko05034//Alcoholism;ko05203//Viral carcinogenesis;ko05322//Systemic lupus erythematosus	K11252;K11252;K11252	GO:0000785//chromatin;GO:0043189//H4/H2A histone acetyltransferase complex	GO:0003676//nucleic acid binding;GO:0046914//transition metal ion binding;GO:0046983//protein dimerization activity	GO:0006325//chromatin organization
ncbi_111064034	Ubr5	E3 ubiquitin-protein ligase hyd isoform X9 [Halyomorpha halys]	Genetic Information Processing	Folding, sorting and degradation	ko04120//Ubiquitin mediated proteolysis	K10593	-	-	-
ncbi_111064125	--	PREDICTED: F-box only protein 7-like isoform X1 [Neodiprion lecontei]	-	-	-	-	-	-	-
ncbi_111064167	Ano1	anoctamin-1-like isoform X1 [Nilaparvata lugens]	-	-	-	-	-	GO:0005254//chloride channel activity	GO:0042742//defense response to bacterium
ncbi_111064220	Hsp27	alpha-crystallin A chain-like [Nilaparvata lugens]	Genetic Information Processing;Organismal Systems	Folding, sorting and degradation;Aging	ko04141//Protein processing in endoplasmic reticulum;ko04213//Longevity regulating pathway - multiple species	K09542;K09542	-	-	-
ncbi_111064223	lap3	cytosol aminopeptidase-like isoform X1 [Nilaparvata lugens]	Metabolism;Metabolism;Metabolism	Global and overview maps;Metabolism of other amino acids;Amino acid metabolism	ko01100//Metabolic pathways;ko00480//Glutathione metabolism;ko00330//Arginine and proline metabolism	K11142;K11142;K11142	GO:0044424//intracellular part	GO:0008238//exopeptidase activity	GO:0007420//brain development;GO:0019538//protein metabolic process
ncbi_111064224	--	Vesicle transport protein SEC20 [Temnothorax longispinosus]	-	-	-	-	-	-	-
ncbi_111064232	--	uncharacterized protein LOC111064232 isoform X1 [Nilaparvata lugens]	-	-	-	-	-	-	-
ncbi_111064319	--	uncharacterized protein LOC111064319 [Nilaparvata lugens]	-	-	-	-	-	-	-
ncbi_111064388	--	uncharacterized protein LOC111064388 [Nilaparvata lugens]	-	-	-	-	-	-	-
ncbi_111064393	Tollo	toll-like receptor Tollo [Nilaparvata lugens]	-	-	-	-	GO:0031224//intrinsic component of membrane	GO:0016791//phosphatase activity;GO:0038023//signaling receptor activity	GO:0002385//mucosal immune response;GO:0006796//phosphate-containing compound metabolic process;GO:0006952//defense response;GO:0010559//regulation of glycoprotein biosynthetic process;GO:0048666//neuron development
ncbi_111064431	--	uncharacterized protein LOC111064431 isoform X1 [Nilaparvata lugens]	-	-	-	-	-	-	-
ncbi_111064450	--	cell wall protein RBR3-like [Nilaparvata lugens]	-	-	-	-	-	-	-
ncbi_111064462	Rph3a	rabphilin-3A [Nilaparvata lugens]	-	-	-	-	GO:0016020//membrane;GO:0016023//cytoplasmic, membrane-bounded vesicle	GO:0017016//Ras GTPase binding;GO:0043167//ion binding	GO:0001505//regulation of neurotransmitter levels;GO:0016192//vesicle-mediated transport;GO:0032940//secretion by cell
ncbi_111064535	lap3	cytosol aminopeptidase-like [Nilaparvata lugens]	Metabolism;Metabolism;Metabolism	Global and overview maps;Metabolism of other amino acids;Amino acid metabolism	ko01100//Metabolic pathways;ko00480//Glutathione metabolism;ko00330//Arginine and proline metabolism	K11142;K11142;K11142	GO:0031984//organelle subcompartment;GO:0043231//intracellular membrane-bounded organelle	GO:0008233//peptidase activity	GO:0007420//brain development;GO:0019538//protein metabolic process
ncbi_111064557	--	RNA-binding protein Musashi homolog Rbp6-like [Nilaparvata lugens]	-	-	-	-	-	-	-
ncbi_111064604	-	-	-	-	-	-	-	-	-
ncbi_111064620	--	uncharacterized protein LOC111064620 [Nilaparvata lugens]	-	-	-	-	-	-	-
ncbi_120348717	--	centriolin-like [Nilaparvata lugens]	-	-	-	-	-	-	-
ncbi_120348766	--	uncharacterized protein LOC111047133 [Nilaparvata lugens]	-	-	-	-	-	-	-
ncbi_120348821	pgk-1	probable phosphoglycerate kinase [Nilaparvata lugens]	Metabolism;Metabolism;Metabolism;Environmental Information Processing;Metabolism	Global and overview maps;Global and overview maps;Global and overview maps;Signal transduction;Carbohydrate metabolism	ko01100//Metabolic pathways;ko01200//Carbon metabolism;ko01230//Biosynthesis of amino acids;ko04066//HIF-1 signaling pathway;ko00010//Glycolysis / Gluconeogenesis	K00927;K00927;K00927;K00927;K00927	GO:0043231//intracellular membrane-bounded organelle	GO:0005515//protein binding;GO:0016772//transferase activity, transferring phosphorus-containing groups;GO:0032550//purine ribonucleoside binding;GO:0060089//molecular transducer activity	GO:0006090//pyruvate metabolic process;GO:0006796//phosphate-containing compound metabolic process;GO:0010468//regulation of gene expression;GO:0034645//cellular macromolecule biosynthetic process;GO:0050794//regulation of cellular process
ncbi_120348871	--	uncharacterized protein LOC111052982 [Nilaparvata lugens]	-	-	-	-	-	-	-
ncbi_120348964	ND-ACP	acyl carrier protein, mitochondrial [Nilaparvata lugens]	Metabolism;Human Diseases;Human Diseases;Organismal Systems;Human Diseases;Metabolism;Human Diseases;Organismal Systems	Global and overview maps;Neurodegenerative diseases;Neurodegenerative diseases;Environmental adaptation;Neurodegenerative diseases;Energy metabolism;Endocrine and metabolic diseases;Nervous system	ko01100//Metabolic pathways;ko05016//Huntington disease;ko05010//Alzheimer disease;ko04714//Thermogenesis;ko05012//Parkinson disease;ko00190//Oxidative phosphorylation;ko04932//Non-alcoholic fatty liver disease (NAFLD);ko04723//Retrograde endocannabinoid signaling	K03955;K03955;K03955;K03955;K03955;K03955;K03955;K03955	-	-	-
ncbi_120348998	-	-	-	-	-	-	-	-	-
ncbi_120349099	HTK7	receptor-type guanylate cyclase gcy-22-like [Photinus pyralis]	-	-	-	-	GO:0031224//intrinsic component of membrane	GO:0004713//protein tyrosine kinase activity;GO:0032550//purine ribonucleoside binding	GO:0006468//protein phosphorylation
ncbi_120349329	sod2	superoxide dismutase [Mn], mitochondrial isoform X2 [Myripristis murdjan]	Human Diseases;Environmental Information Processing;Cellular Processes;Organismal Systems;Organismal Systems;Environmental Information Processing;Organismal Systems	Neurodegenerative diseases;Signal transduction;Transport and catabolism;Aging;Aging;Signal transduction;Aging	ko05016//Huntington disease;ko04013//MAPK signaling pathway - fly;ko04146//Peroxisome;ko04212//Longevity regulating pathway - worm;ko04213//Longevity regulating pathway - multiple species;ko04068//FoxO signaling pathway;ko04211//Longevity regulating pathway - mammal	K04564;K04564;K04564;K04564;K04564;K04564;K04564	GO:0043227//membrane-bounded organelle	-	GO:0000302//response to reactive oxygen species;GO:0006801//superoxide metabolic process;GO:0007005//mitochondrion organization;GO:0008015//blood circulation;GO:0009628//response to abiotic stimulus;GO:0010033//response to organic substance;GO:0010038//response to metal ion;GO:0019222//regulation of metabolic process;GO:0030154//cell differentiation;GO:0034599//cellular response to oxidative stre…
ncbi_120349368	TUBA1C	tubulin alpha-8 chain-like [Nilaparvata lugens]	Human Diseases;Human Diseases;Human Diseases;Cellular Processes;Cellular Processes;Cellular Processes;Cellular Processes	Neurodegenerative diseases;Neurodegenerative diseases;Infectious diseases;Transport and catabolism;Cellular community - eukaryotes;Cell growth and death;Cellular community - eukaryotes	ko05016//Huntington disease;ko05010//Alzheimer disease;ko05130//Pathogenic Escherichia coli infection;ko04145//Phagosome;ko04530//Tight junction;ko04210//Apoptosis;ko04540//Gap junction	K07374;K07374;K07374;K07374;K07374;K07374;K07374	GO:0005768//endosome;GO:0005874//microtubule;GO:0031988//membrane-bounded vesicle;GO:0035770//ribonucleoprotein granule	GO:0005198//structural molecule activity;GO:0005515//protein binding;GO:0017111//nucleoside-triphosphatase activity;GO:0032550//purine ribonucleoside binding	GO:0043623//cellular protein complex assembly;GO:0044763//single-organism cellular process
ncbi_120349479	--	hypothetical protein LSTR_LSTR005268 [Laodelphax striatellus]	-	-	-	-	-	-	-
ncbi_120349779	tdc-1	tyrosine decarboxylase-like isoform X4 [Nilaparvata lugens]	Metabolism;Metabolism	Global and overview maps;Amino acid metabolism	ko01100//Metabolic pathways;ko00350//Tyrosine metabolism	K22329;K22329	GO:0016023//cytoplasmic, membrane-bounded vesicle;GO:0043005//neuron projection;GO:0044297//cell body	GO:0005515//protein binding;GO:0016831//carboxy-lyase activity;GO:0031406//carboxylic acid binding	GO:0007275//multicellular organism development;GO:0009404//toxin metabolic process;GO:0015837//amine transport;GO:0017085//response to insecticide;GO:0042417//dopamine metabolic process;GO:0042428//serotonin metabolic process;GO:0042493//response to drug;GO:0043279//response to alkaloid;GO:0048511//rhythmic process;GO:0070848//response to growth factor
ncbi_120349827	--	hypothetical protein LSTR_LSTR006956 [Laodelphax striatellus]	-	-	-	-	-	-	-
ncbi_120349858	--	uncharacterized protein LOC111054896 [Nilaparvata lugens]	-	-	-	-	-	-	-
ncbi_120349883	--	uncharacterized protein LOC111049949 isoform X1 [Nilaparvata lugens]	-	-	-	-	-	-	-
ncbi_120349890	--	E3 ubiquitin-protein ligase synoviolin B-like [Nilaparvata lugens]	-	-	-	-	-	-	-
ncbi_120350005	--	uncharacterized protein LOC111064449 isoform X1 [Nilaparvata lugens]	-	-	-	-	-	-	-
ncbi_120350011	--	hypothetical protein LSTR_LSTR000051 [Laodelphax striatellus]	-	-	-	-	-	-	-
ncbi_120350033	LARS2	LOW QUALITY PROTEIN: probable leucine--tRNA ligase, mitochondrial, partial [Nilaparvata lugens]	Genetic Information Processing	Translation	ko00970//Aminoacyl-tRNA biosynthesis	K01869	GO:0005739//mitochondrion	GO:0004812//aminoacyl-tRNA ligase activity	GO:0006418//tRNA aminoacylation for protein translation
ncbi_120350044	Nckx30C	sodium/potassium/calcium exchanger Nckx30C-like, partial [Nilaparvata lugens]	-	-	-	-	GO:0031224//intrinsic component of membrane	GO:0015081//sodium ion transmembrane transporter activity	GO:0006814//sodium ion transport;GO:0044763//single-organism cellular process
ncbi_120350085	VAChT	vesicular acetylcholine transporter isoform X1 [Nilaparvata lugens]	Organismal Systems;Organismal Systems	Nervous system;Nervous system	ko04725//Cholinergic synapse;ko04721//Synaptic vesicle cycle	K14636;K14636	GO:0031224//intrinsic component of membrane	GO:0005326//neurotransmitter transporter activity;GO:0022857//transmembrane transporter activity	GO:0044763//single-organism cellular process;GO:0044765//single-organism transport
ncbi_120350117	--	NAD-dependent protein deacetylase sirtuin-1 [Nilaparvata lugens]	Metabolism;Human Diseases;Cellular Processes;Organismal Systems;Environmental Information Processing;Organismal Systems;Environmental Information Processing;Organismal Systems;Organismal Systems;Human Diseases;Metabolism	Global and overview maps;Cancers;Cell growth and death;Aging;Signal transduction;Aging;Signal transduction;Endocrine system;Aging;Substance dependence;Metabolism of cofactors and vitamins	ko01100//Metabolic pathways;ko05206//MicroRNAs in cancer;ko04218//Cellular senescence;ko04212//Longevity regulating pathway - worm;ko04152//AMPK signaling pathway;ko04213//Longevity regulating pathway - multiple species;ko04068//FoxO signaling pathway;ko04922//Glucagon signaling pathway;ko04211//Longevity regulating pathway - mammal;ko05031//Amphetamine addiction;ko00760//Nicotinate and nicotinam…	K11411;K11411;K11411;K11411;K11411;K11411;K11411;K11411;K11411;K11411;K11411	-	-	-
ncbi_120350258	--	craniofacial development protein 2-like [Nilaparvata lugens]	-	-	-	-	-	-	-
ncbi_120350339	ast	protein asteroid-like [Nilaparvata lugens]	-	-	-	-	-	-	-
ncbi_120350475	--	uncharacterized protein LOC111054143, partial [Nilaparvata lugens]	-	-	-	-	-	-	-
ncbi_120350529	--	PREDICTED: protein pitchfork-like [Priapulus caudatus]	-	-	-	-	-	-	-
ncbi_120350579	--	NACHT, LRR and PYD domains-containing protein 14-like, partial [Myripristis murdjan]	-	-	-	-	-	-	-
ncbi_120350645	--	hypothetical protein LSTR_LSTR007728 [Laodelphax striatellus]	-	-	-	-	-	-	-
ncbi_120350792	--	zinc finger protein 354B-like [Nilaparvata lugens]	Human Diseases	Infectious diseases	ko05168//Herpes simplex infection	K09228	-	-	-
ncbi_120350818	zdhhc15b	palmitoyltransferase ZDHHC15 isoform X5 [Nilaparvata lugens]	-	-	-	-	-	GO:0016740//transferase activity	-
ncbi_120350888	--	Neurofilament heavy polypeptide [Amphibalanus amphitrite]	-	-	-	-	-	-	-
ncbi_120350939	--	hypothetical protein LSTR_LSTR007402 [Laodelphax striatellus]	-	-	-	-	-	-	-
ncbi_120350960	--	-	-	-	-	-	-	-	-
ncbi_120351067	--	BRISC and BRCA1-A complex member 2-like [Nilaparvata lugens]	Genetic Information Processing	Replication and repair	ko03440//Homologous recombination	K12173	GO:0043231//intracellular membrane-bounded organelle;GO:0043234//protein complex	GO:0005515//protein binding	GO:0006281//DNA repair
ncbi_120351110	Pof	protein painting of fourth-like, partial [Nilaparvata lugens]	-	-	-	-	-	-	-
ncbi_120351148	--	piggyBac transposable element-derived protein 3-like [Nilaparvata lugens]	-	-	-	-	-	-	-
ncbi_120351193	RTase	PREDICTED: RNA-directed DNA polymerase from mobile element jockey-like isoform X1 [Amyelois transitella]	-	-	-	-	-	-	-
ncbi_120351195	URA3	uridine 5'-monophosphate synthase isoform X2 [Nilaparvata lugens]	Metabolism;Metabolism;Metabolism	Global and overview maps;Xenobiotics biodegradation and metabolism;Nucleotide metabolism	ko01100//Metabolic pathways;ko00983//Drug metabolism - other enzymes;ko00240//Pyrimidine metabolism	K13421;K13421;K13421	GO:0043234//protein complex	GO:0016740//transferase activity;GO:0016831//carboxy-lyase activity	GO:0006796//phosphate-containing compound metabolic process;GO:0044711//single-organism biosynthetic process;GO:0055086//nucleobase-containing small molecule metabolic process;GO:0072528//pyrimidine-containing compound biosynthetic process
ncbi_120351236	SATL1	diamine acetyltransferase 1 [Nilaparvata lugens]	Metabolism;Metabolism;Cellular Processes	Global and overview maps;Amino acid metabolism;Cell growth and death	ko01100//Metabolic pathways;ko00330//Arginine and proline metabolism;ko04216//Ferroptosis	K00657;K00657;K00657	-	-	-
ncbi_120351267	--	BTB/POZ domain-containing protein 3-like isoform X1 [Nilaparvata lugens]	-	-	-	-	-	-	-
ncbi_120351286	--	lugensin A [Nilaparvata lugens]	-	-	-	-	-	-	-
ncbi_120351287	--	lugensin A [Nilaparvata lugens]	-	-	-	-	-	-	-
ncbi_120351307	--	apolipoprotein D-like [Tetranychus urticae]	-	-	-	-	-	-	-
ncbi_120351384	ddx20	ATP-dependent RNA helicase DHH1-like isoform X1 [Nilaparvata lugens]	Genetic Information Processing	Translation	ko03013//RNA transport	K13131	-	-	-
ncbi_120351561	nrxn1b	neurexin-4 [Nilaparvata lugens]	-	-	-	-	-	-	-
ncbi_120351573	His4	histone H4-like [Octopus vulgaris]	Human Diseases;Human Diseases;Human Diseases	Substance dependence;Cancers;Immune diseases	ko05034//Alcoholism;ko05203//Viral carcinogenesis;ko05322//Systemic lupus erythematosus	K11254;K11254;K11254	GO:0000785//chromatin;GO:0031988//membrane-bounded vesicle;GO:0043231//intracellular membrane-bounded organelle	GO:0003723//RNA binding;GO:0046983//protein dimerization activity	GO:0006334//nucleosome assembly;GO:0045638//negative regulation of myeloid cell differentiation;GO:0051262//protein tetramerization
ncbi_120351712	nrxn1b	neurexin-4 [Nilaparvata lugens]	-	-	-	-	-	-	GO:0010466//negative regulation of peptidase activity
ncbi_120351766	dnaaf3	dynein assembly factor 3, axonemal [Nilaparvata lugens]	-	-	-	-	-	-	-
ncbi_120351873	--	protein NLRC5-like, partial [Nilaparvata lugens]	-	-	-	-	-	-	-
ncbi_120352165	--	zinc finger BED domain-containing protein 4 [Bicyclus anynana]	-	-	-	-	-	-	-
ncbi_120352180	XPNPEP3	probable Xaa-Pro aminopeptidase 3 [Nilaparvata lugens]	-	-	-	-	-	GO:0016787//hydrolase activity;GO:0043167//ion binding	GO:0008152//metabolic process
ncbi_120352281	Ddx10	PREDICTED: probable ATP-dependent RNA helicase DDX10 [Megachile rotundata]	-	-	-	-	-	GO:0003723//RNA binding;GO:0016787//hydrolase activity	-
ncbi_120352282	--	piwi-like protein Ago3 isoform X1 [Nilaparvata lugens]	-	-	-	-	-	-	-
ncbi_120352292	CYP4C1	cytochrome P450 CYP417A2 [Nilaparvata lugens]	-	-	-	-	-	-	-
ncbi_120352554	AAEL006169	lysosomal aspartic protease [Nilaparvata lugens]	Cellular Processes;Cellular Processes;Cellular Processes;Organismal Systems;Human Diseases;Environmental Information Processing	Transport and catabolism;Transport and catabolism;Cell growth and death;Endocrine system;Infectious diseases;Signal transduction	ko04142//Lysosome;ko04140//Autophagy - animal;ko04210//Apoptosis;ko04915//Estrogen signaling pathway;ko05152//Tuberculosis;ko04071//Sphingolipid signaling pathway	K01379;K01379;K01379;K01379;K01379;K01379	GO:0000323//lytic vacuole	GO:0004175//endopeptidase activity	GO:0019538//protein metabolic process
ncbi_120352635	--	hypothetical protein LSTR_LSTR008726 [Laodelphax striatellus]	-	-	-	-	-	-	-
ncbi_120352733	ECSIT	evolutionarily conserved signaling intermediate in Toll pathway, mitochondrial [Nilaparvata lugens]	Environmental Information Processing	Signal transduction	ko04010//MAPK signaling pathway	K04405	-	-	-
ncbi_120352819	--	LOW QUALITY PROTEIN: meiosis regulator and mRNA stability factor 1 [Nilaparvata lugens]	-	-	-	-	-	-	-
ncbi_120352871	Wdr81	WD repeat-containing protein 81, partial [Nilaparvata lugens]	-	-	-	-	-	GO:0016740//transferase activity	-
ncbi_120353060	Tret1	sugar transporter [Nilaparvata lugens]	-	-	-	-	-	-	-
ncbi_120353061	--	uncharacterized protein LOC111059924, partial [Nilaparvata lugens]	-	-	-	-	-	-	-
ncbi_120353153	--	hypothetical protein [Nilaparvata lugens]	-	-	-	-	-	-	-
ncbi_120353227	--	Retrovirus-related Pol polyprotein from transposon 17.6, partial [Stegodyphus mimosarum]	-	-	-	-	-	-	-
ncbi_120353229	--	microtubule-associated protein futsch [Asbolus verrucosus]	-	-	-	-	-	-	-
ncbi_120353287	--	piggyBac transposable element-derived protein 1-like, partial [Nilaparvata lugens]	-	-	-	-	-	-	-
ncbi_120353303	--	-	-	-	-	-	-	-	-
ncbi_120353520	--	uncharacterized protein LOC111049483 [Nilaparvata lugens]	-	-	-	-	-	-	-
ncbi_120353609	--	Integrase catalytic domain-containing protein, partial [Aphis craccivora]	-	-	-	-	-	-	-
ncbi_120353669	--	hypothetical protein LSTR_LSTR005773 [Laodelphax striatellus]	-	-	-	-	-	-	-
ncbi_120353693	PCP20	cuticular protein [Nilaparvata lugens]	-	-	-	-	-	-	-
ncbi_120353699	--	uncharacterized protein LOC111049781 isoform X2 [Nilaparvata lugens]	-	-	-	-	-	-	-
ncbi_120353783	--	-	-	-	-	-	-	-	-
ncbi_120353870	--	hypothetical protein LSTR_LSTR003459 [Laodelphax striatellus]	-	-	-	-	-	-	-
ncbi_120353965	--	nuclease harbi1 [Lasius niger]	-	-	-	-	-	-	-
ncbi_120354276	--	Integrase catalytic domain-containing protein, partial [Aphis craccivora]	-	-	-	-	-	-	-
ncbi_120354358	--	TSC22 domain family protein 1-like [Nilaparvata lugens]	-	-	-	-	-	-	-
ncbi_120354481	--	serine arginine repetitive matrix 2-like protein [Labeo rohita]	-	-	-	-	-	-	-
ncbi_120354629	--	reverse transcriptase [Anopheles gambiae]	-	-	-	-	-	-	-
ncbi_120354884	AKR1E2	1,5-anhydro-D-fructose reductase-like [Folsomia candida]	Metabolism;Metabolism;Metabolism;Metabolism	Global and overview maps;Carbohydrate metabolism;Lipid metabolism;Carbohydrate metabolism	ko01100//Metabolic pathways;ko00010//Glycolysis / Gluconeogenesis;ko00561//Glycerolipid metabolism;ko00040//Pentose and glucuronate interconversions	K00002;K00002;K00002;K00002	-	-	-
ncbi_120354917	--	Jerky-like, partial [Aphis craccivora]	-	-	-	-	-	-	-
ncbi_120355309	-	-	-	-	-	-	-	-	-
ncbi_120355310	groS	groS [Trichonephila clavipes]	-	-	-	-	GO:0005737//cytoplasm;GO:0043231//intracellular membrane-bounded organelle;GO:0043232//intracellular non-membrane-bounded organelle	-	-
ncbi_120355433	STAG1	cohesin subunit SA-1-like [Nilaparvata lugens]	Cellular Processes	Cell growth and death	ko04110//Cell cycle	K06671	-	-	-
ncbi_120355481	--	hypothetical protein LSTR_LSTR000052 [Laodelphax striatellus]	-	-	-	-	-	-	-
ncbi_120355484	--	uncharacterized protein LOC111053283 [Nilaparvata lugens]	-	-	-	-	-	-	-
ncbi_120355487	lap3	cytosol aminopeptidase-like isoform X1 [Nilaparvata lugens]	Metabolism;Metabolism;Metabolism	Global and overview maps;Metabolism of other amino acids;Amino acid metabolism	ko01100//Metabolic pathways;ko00480//Glutathione metabolism;ko00330//Arginine and proline metabolism	K11142;K11142;K11142	GO:0044424//intracellular part	GO:0008238//exopeptidase activity	GO:0007420//brain development;GO:0019538//protein metabolic process
ncbi_120355505	traI	TrwC and TraI and AAA 30 domain containing protei n [Trichuris trichiura]	-	-	-	-	-	-	-
ncbi_120355616	DNAH7	dynein heavy chain 7, axonemal-like, partial [Nilaparvata lugens]	Human Diseases	Neurodegenerative diseases	ko05016//Huntington disease	K10408	GO:0005868//cytoplasmic dynein complex;GO:0042995//cell projection	GO:0003774//motor activity;GO:0032550//purine ribonucleoside binding;GO:0046872//metal ion binding	GO:0007018//microtubule-based movement;GO:0048870//cell motility
ncbi_120355691	--	uncharacterized protein LOC111049483 [Nilaparvata lugens]	-	-	-	-	-	-	-
ncbi_120355703	--	Transposable element P transposase, partial [Aphis craccivora]	-	-	-	-	-	-	-
ncbi_120355777	--	serine/threonine-protein kinase ATR-like [Nilaparvata lugens]	-	-	-	-	-	-	-
ncbi_120355882	His2B	histone H2B [Nilaparvata lugens]	Human Diseases;Human Diseases;Human Diseases	Substance dependence;Cancers;Immune diseases	ko05034//Alcoholism;ko05203//Viral carcinogenesis;ko05322//Systemic lupus erythematosus	K11252;K11252;K11252	GO:0000785//chromatin;GO:0043189//H4/H2A histone acetyltransferase complex	GO:0003676//nucleic acid binding;GO:0046914//transition metal ion binding;GO:0046983//protein dimerization activity	GO:0006325//chromatin organization
ncbi_120355946	LAC25	laccase-4-like [Nilaparvata lugens]	-	-	-	-	-	-	GO:0042335//cuticle development
ncbi_120355961	--	cleavage and polyadenylation specificity factor 73-like [Nilaparvata lugens]	-	-	-	-	-	-	-
ncbi_120355984	--	nonconserved Y2 protein, partial [Rhodnius prolixus]	-	-	-	-	-	-	-
ncbi_120356101	CYP3A4	cytochrome P450 CYP6ER1 variant vF [Nilaparvata lugens]	-	-	-	-	GO:0031090//organelle membrane;GO:0043231//intracellular membrane-bounded organelle	GO:0005515//protein binding;GO:0008289//lipid binding;GO:0008395//steroid hydroxylase activity;GO:0016709//oxidoreductase activity, acting on paired donors, with incorporation or reduction of molecular oxygen, NAD(P)H as one donor, and incorporation of one atom of oxygen;GO:0033695//oxidoreductase activity, acting on CH or CH2 groups, quinone or similar compound as acceptor;GO:0046914//transition…	GO:0006721//terpenoid metabolic process;GO:0009820//alkaloid metabolic process;GO:0017144//drug metabolic process;GO:0042368//vitamin D biosynthetic process;GO:0042493//response to drug;GO:0055114//oxidation-reduction process
ncbi_120356146	ATG8	ATG8-3 [Dugesia japonica]	Human Diseases;Cellular Processes;Environmental Information Processing;Organismal Systems;Human Diseases;Environmental Information Processing;Organismal Systems;Organismal Systems;Cellular Processes;Cellular Processes	Infectious diseases;Transport and catabolism;Signal transduction;Aging;Infectious diseases;Signal transduction;Immune system;Nervous system;Transport and catabolism;Transport and catabolism	ko05131//Shigellosis;ko04140//Autophagy - animal;ko04371//Apelin signaling pathway;ko04212//Longevity regulating pathway - worm;ko05167//Kaposi sarcoma-associated herpesvirus infection;ko04068//FoxO signaling pathway;ko04621//NOD-like receptor signaling pathway;ko04727//GABAergic synapse;ko04137//Mitophagy - animal;ko04136//Autophagy - other eukaryotes	K08341;K08341;K08341;K08341;K08341;K08341;K08341;K08341;K08341;K08341	GO:0005767//secondary lysosome;GO:0005775//vacuolar lumen;GO:0005776//autophagosome	GO:0019900//kinase binding	GO:0006914//autophagy;GO:0010259//multicellular organism aging;GO:0010623//developmental programmed cell death;GO:0031329//regulation of cellular catabolic process;GO:1903320//regulation of protein modification by small protein conjugation or removal
ncbi_120356148	--	cubilin [Nilaparvata lugens]	Organismal Systems	Digestive system	ko04977//Vitamin digestion and absorption	K14616	-	-	-
ncbi_120356171	--	uncharacterized protein LOC111049781 isoform X1 [Nilaparvata lugens]	-	-	-	-	-	-	-
ncbi_120356176	Slc5a12	sodium-coupled monocarboxylate transporter 2-like [Nilaparvata lugens]	-	-	-	-	GO:0031224//intrinsic component of membrane	-	GO:0044763//single-organism cellular process;GO:0051234//establishment of localization
ncbi_120356187	--	NEDD8 ultimate buster 1-like [Nilaparvata lugens]	-	-	-	-	-	-	-
ncbi_120356231	rpn7	26S proteasome non-ATPase regulatory subunit 6 [Tetranychus urticae]	Human Diseases;Genetic Information Processing	Infectious diseases;Folding, sorting and degradation	ko05169//Epstein-Barr virus infection;ko03050//Proteasome	K03037;K03037	-	-	-
ncbi_120356269	--	keratin, type II cytoskeletal I-like [Nilaparvata lugens]	-	-	-	-	-	-	-
ncbi_120356309	pro11	striatin [Nematostella vectensis]	Environmental Information Processing	Signal transduction	ko04013//MAPK signaling pathway - fly	K17608	GO:0044424//intracellular part	GO:0005515//protein binding	GO:0008152//metabolic process;GO:0050794//regulation of cellular process
ncbi_120356357	apn2	PREDICTED: DNA-(apurinic or apyrimidinic site) lyase 2-like, partial [Plutella xylostella]	Genetic Information Processing	Replication and repair	ko03410//Base excision repair	K10772	-	-	-
ncbi_120356369	LYS5	saccharopine dehydrogenase [Salpingoeca rosetta]	Metabolism;Metabolism;Metabolism;Metabolism	Global and overview maps;Global and overview maps;Amino acid metabolism;Amino acid metabolism	ko01100//Metabolic pathways;ko01230//Biosynthesis of amino acids;ko00310//Lysine degradation;ko00300//Lysine biosynthesis	K00290;K00290;K00290;K00290	-	-	-
ncbi_120356460	SMS	LOW QUALITY PROTEIN: spermine synthase-like [Nilaparvata lugens]	Metabolism;Metabolism;Metabolism;Metabolism	Global and overview maps;Metabolism of other amino acids;Amino acid metabolism;Amino acid metabolism	ko01100//Metabolic pathways;ko00480//Glutathione metabolism;ko00330//Arginine and proline metabolism;ko00270//Cysteine and methionine metabolism	K00802;K00802;K00802;K00802	-	GO:0016765//transferase activity, transferring alkyl or aryl (other than methyl) groups	GO:0006596//polyamine biosynthetic process
ncbi_120356489	--	LOW QUALITY PROTEIN: aminopeptidase N-like [Nilaparvata lugens]	Metabolism;Metabolism;Organismal Systems;Organismal Systems	Global and overview maps;Metabolism of other amino acids;Endocrine system;Immune system	ko01100//Metabolic pathways;ko00480//Glutathione metabolism;ko04614//Renin-angiotensin system;ko04640//Hematopoietic cell lineage	K11140;K11140;K11140;K11140	-	-	-
ncbi_120356505	rpoA	PREDICTED: DNA-directed RNA polymerase subunit alpha-like [Lipotes vexillifer]	Genetic Information Processing	Transcription	ko03020//RNA polymerase	K03040	-	-	-
ncbi_120356538	PGBD2	piggyBac transposable element-derived protein 3-like, partial [Ostrinia furnacalis]	-	-	-	-	-	-	-
ncbi_120356547	--	filaggrin-2 [Nilaparvata lugens]	Human Diseases;Organismal Systems	Cancers;Development and regeneration	ko05206//MicroRNAs in cancer;ko04361//Axon regeneration	K12035;K12035	GO:0031674//I band	GO:0019787//ubiquitin-like protein transferase activity;GO:0046914//transition metal ion binding	GO:0006936//muscle contraction;GO:0010927//cellular component assembly involved in morphogenesis;GO:0019725//cellular homeostasis;GO:0032446//protein modification by small protein conjugation;GO:0055002//striated muscle cell development
ncbi_120356566	--	ATP-binding cassette transporter sub-family G member 5 [Nilaparvata lugens]	-	-	-	-	-	-	-
ncbi_120356574	tut1	poly(A) RNA polymerase cid11-like, partial [Nilaparvata lugens]	-	-	-	-	GO:0044424//intracellular part	GO:0005488//binding	-
ncbi_120356635	--	SWIM-type domain-containing protein, partial [Aphis craccivora]	-	-	-	-	-	-	-
ncbi_120356705	--	multicopper oxidase 1 [Nilaparvata lugens]	-	-	-	-	-	-	-

## Sheet: Sheet2
GeneID	K_ID
MSTRG.1110
MSTRG.14771
MSTRG.15430
MSTRG.19141
MSTRG.20211
MSTRG.20348
MSTRG.26197
MSTRG.26218
MSTRG.26861
MSTRG.447
MSTRG.5470
ncbi_111043287
ncbi_111043308	K05668
ncbi_111043313
ncbi_111043427
ncbi_111043519
ncbi_111043532
ncbi_111043545	K13711
ncbi_111043556	K12373
ncbi_111043593
ncbi_111043596
ncbi_111043673
ncbi_111043678	K04459
ncbi_111043697
ncbi_111043705
ncbi_111043712
ncbi_111043797	K00873
ncbi_111043803
ncbi_111043853
ncbi_111043950
ncbi_111043964
ncbi_111044034
ncbi_111044100
ncbi_111044180	K01135
ncbi_111044214	K10418
ncbi_111044232	K02359
ncbi_111044264	K10250
ncbi_111044266	K08048																												K08048	K08048	K08048	K08048	K08048	K08048	K08048	K08048	K08048	K08048	K08048	K08048	K08048	K08048	K08048	K08048	K08048	K08048	K08048	K08048	K08048
ncbi_111044309	K04468
ncbi_111044381
ncbi_111044383
ncbi_111044422	K02266
ncbi_111044455
ncbi_111044492
ncbi_111044586
ncbi_111044590
ncbi_111044684	K22291
ncbi_111044686
ncbi_111044689
ncbi_111044690	K12838
ncbi_111044817
ncbi_111044840
ncbi_111044861
ncbi_111044863	K13356
ncbi_111044869
ncbi_111044875
ncbi_111045022
ncbi_111045030
ncbi_111045055	K00115
ncbi_111045056	K00115
ncbi_111045060
ncbi_111045197
ncbi_111045247	K04552
ncbi_111045303	K20668
ncbi_111045397
ncbi_111045417	K06269
ncbi_111045419
ncbi_111045434
ncbi_111045443
ncbi_111045476
ncbi_111045500
ncbi_111045504
ncbi_111045609
ncbi_111045698	K04345																												K04345	K04345	K04345	K04345	K04345	K04345	K04345	K04345	K04345	K04345	K04345	K04345	K04345	K04345	K04345	K04345	K04345	K04345	K04345	K04345	K04345
ncbi_111045729
ncbi_111045732	K17391
ncbi_111045767
ncbi_111045884
ncbi_111045962	K17794
ncbi_111045966
ncbi_111045973
ncbi_111046033
ncbi_111046103	K03671
ncbi_111046108
ncbi_111046119
ncbi_111046152
ncbi_111046157
ncbi_111046227
ncbi_111046285
ncbi_111046290
ncbi_111046317
ncbi_111046320	K10771
ncbi_111046329
ncbi_111046331
ncbi_111046377
ncbi_111046387
ncbi_111046398
ncbi_111046415	K04131
ncbi_111046480
ncbi_111046503
ncbi_111046523
ncbi_111046569	K12259
ncbi_111046604	K15040
ncbi_111046632
ncbi_111046646	K02150
ncbi_111046667	K00161
ncbi_111046681	K05613
ncbi_111046695
ncbi_111046700	K13885
ncbi_111046729	K00248
ncbi_111046792	K15013
ncbi_111046832
ncbi_111046864
ncbi_111046868
ncbi_111046872	K17065
ncbi_111046873
ncbi_111046881
ncbi_111046883
ncbi_111046889
ncbi_111046897
ncbi_111046898
ncbi_111046938
ncbi_111047063
ncbi_111047215	K09228
ncbi_111047218
ncbi_111047253	K06497
ncbi_111047255
ncbi_111047270
ncbi_111047271
ncbi_111047276
ncbi_111047340
ncbi_111047392
ncbi_111047473
ncbi_111047502
ncbi_111047513
ncbi_111047580
ncbi_111047586	K13137
ncbi_111047675	K04661
ncbi_111047688
ncbi_111047732
ncbi_111047751
ncbi_111047800
ncbi_111047866
ncbi_111047895
ncbi_111047999
ncbi_111048009
ncbi_111048018
ncbi_111048023
ncbi_111048067
ncbi_111048151
ncbi_111048164
ncbi_111048166
ncbi_111048195
ncbi_111048198
ncbi_111048231	K04523
ncbi_111048236
ncbi_111048296
ncbi_111048310
ncbi_111048337	K13247
ncbi_111048416
ncbi_111048427
ncbi_111048431	K22674
ncbi_111048504
ncbi_111048564
ncbi_111048587
ncbi_111048626
ncbi_111048650
ncbi_111048704	K01053
ncbi_111048713	K07967
ncbi_111048714
ncbi_111048726
ncbi_111048735
ncbi_111048749	K05665
ncbi_111048782
ncbi_111048799
ncbi_111048844
ncbi_111048875
ncbi_111048878
ncbi_111048910	K12275
ncbi_111048913
ncbi_111048958
ncbi_111048961	K18592
ncbi_111049012
ncbi_111049027
ncbi_111049066
ncbi_111049131
ncbi_111049140	K00164
ncbi_111049168
ncbi_111049249
ncbi_111049250	K01672
ncbi_111049255
ncbi_111049287
ncbi_111049320	K03176
ncbi_111049327
ncbi_111049362
ncbi_111049370	K18592
ncbi_111049383	K00501
ncbi_111049389
ncbi_111049445
ncbi_111049513
ncbi_111049563	K10250
ncbi_111049579
ncbi_111049611
ncbi_111049626
ncbi_111049631
ncbi_111049652
ncbi_111049686
ncbi_111049689
ncbi_111049707
ncbi_111049781
ncbi_111049819
ncbi_111049850
ncbi_111049904	K12377
ncbi_111049915
ncbi_111049942
ncbi_111050065	K10408
ncbi_111050302	K04919
ncbi_111050324
ncbi_111050327
ncbi_111050333
ncbi_111050370
ncbi_111050388
ncbi_111050414
ncbi_111050438
ncbi_111050469
ncbi_111050478
ncbi_111050528
ncbi_111050536
ncbi_111050577
ncbi_111050691
ncbi_111050706	K03139
ncbi_111050791
ncbi_111050813	K13279
ncbi_111050819
ncbi_111050821	K03022
ncbi_111050866
ncbi_111050881
ncbi_111050882	K00799
ncbi_111051007
ncbi_111051013
ncbi_111051124
ncbi_111051137
ncbi_111051261	K01870
ncbi_111051306
ncbi_111051318
ncbi_111051368
ncbi_111051406
ncbi_111051414
ncbi_111051435
ncbi_111051452
ncbi_111051566
ncbi_111051651
ncbi_111051680
ncbi_111051698
ncbi_111051699
ncbi_111051700
ncbi_111051725	K17902
ncbi_111051745
ncbi_111051778
ncbi_111051810	K05613
ncbi_111051820	K00863
ncbi_111051860
ncbi_111051862
ncbi_111051964
ncbi_111052014
ncbi_111052066	K15144
ncbi_111052159
ncbi_111052170	K14616
ncbi_111052271	K00814
ncbi_111052314	K22329
ncbi_111052342
ncbi_111052404
ncbi_111052460
ncbi_111052550	K01904
ncbi_111052612	K11252
ncbi_111052701
ncbi_111052743	K01930
ncbi_111052808
ncbi_111052953
ncbi_111052954
ncbi_111053035	K04345																												K04345	K04345	K04345	K04345	K04345	K04345	K04345	K04345	K04345	K04345	K04345	K04345	K04345	K04345	K04345	K04345	K04345	K04345	K04345	K04345	K04345
ncbi_111053071
ncbi_111053117
ncbi_111053123
ncbi_111053148
ncbi_111053180
ncbi_111053283
ncbi_111053286
ncbi_111053316
ncbi_111053344	K04249
ncbi_111053346
ncbi_111053359
ncbi_111053362
ncbi_111053425
ncbi_111053431
ncbi_111053443	K00049
ncbi_111053477
ncbi_111053478
ncbi_111053504
ncbi_111053527
ncbi_111053535
ncbi_111053602
ncbi_111053613	K11426
ncbi_111053717
ncbi_111053731	K11142
ncbi_111053795
ncbi_111053891	K08202
ncbi_111053907
ncbi_111053947
ncbi_111053981
ncbi_111054131
ncbi_111054155
ncbi_111054162	K03283
ncbi_111054170
ncbi_111054200
ncbi_111054254
ncbi_111054255
ncbi_111054263
ncbi_111054266	K09699
ncbi_111054271
ncbi_111054320
ncbi_111054332
ncbi_111054340
ncbi_111054389	K01520
ncbi_111054391
ncbi_111054465	K13356
ncbi_111054584	K00108
ncbi_111054593
ncbi_111054657
ncbi_111054673
ncbi_111054704
ncbi_111054729	K19730
ncbi_111054738
ncbi_111054744	K00522
ncbi_111054769	K11426
ncbi_111054775
ncbi_111054798
ncbi_111054799
ncbi_111055048	K06269
ncbi_111055082
ncbi_111055124
ncbi_111055154
ncbi_111055171	K01785
ncbi_111055247
ncbi_111055257	K13780
ncbi_111055280
ncbi_111055340
ncbi_111055358
ncbi_111055387	K00106
ncbi_111055398
ncbi_111055399	K07374
ncbi_111055477
ncbi_111055510
ncbi_111055591
ncbi_111055593
ncbi_111055620
ncbi_111055650
ncbi_111055669
ncbi_111055681
ncbi_111055754
ncbi_111055838	K01052
ncbi_111055965
ncbi_111056001	K00558
ncbi_111056011
ncbi_111056064
ncbi_111056144
ncbi_111056153
ncbi_111056164
ncbi_111056180
ncbi_111056195
ncbi_111056257	K14408
ncbi_111056297	K01904
ncbi_111056365
ncbi_111056397
ncbi_111056407
ncbi_111056511
ncbi_111056558	K08509
ncbi_111056596
ncbi_111056673
ncbi_111056702
ncbi_111056740	K06639
ncbi_111056784
ncbi_111056891	K07375
ncbi_111056976	K00939
ncbi_111056993
ncbi_111057006
ncbi_111057031
ncbi_111057045
ncbi_111057162
ncbi_111057397	K01810
ncbi_111057432	K09319
ncbi_111057437	K01191
ncbi_111057531
ncbi_111057609
ncbi_111057656	K00286
ncbi_111057664	K07763
ncbi_111057689
ncbi_111057722
ncbi_111057825	K00699
ncbi_111057877
ncbi_111057905	K01206
ncbi_111057950
ncbi_111057975	K16185
ncbi_111058034
ncbi_111058076
ncbi_111058094
ncbi_111058112	K16513
ncbi_111058179
ncbi_111058207
ncbi_111058316	K07819
ncbi_111058429	K01135
ncbi_111058481
ncbi_111058532
ncbi_111058575
ncbi_111058611	K14073
ncbi_111058626	K19476
ncbi_111058682
ncbi_111058755	K10250
ncbi_111058761
ncbi_111058784
ncbi_111058812
ncbi_111058864	K01785
ncbi_111058915
ncbi_111059089
ncbi_111059217
ncbi_111059222
ncbi_111059261
ncbi_111059291
ncbi_111059404	K04079
ncbi_111059597
ncbi_111059698	K15734
ncbi_111059739
ncbi_111059786
ncbi_111059842	K11142
ncbi_111059885
ncbi_111059899
ncbi_111059918
ncbi_111059935	K01204
ncbi_111059937	K00753
ncbi_111059957	K12259
ncbi_111059990
ncbi_111060035	K04365																												K04365	K04365	K04365	K04365	K04365	K04365	K04365	K04365	K04365	K04365	K04365	K04365	K04365	K04365	K04365	K04365	K04365
ncbi_111060097
ncbi_111060134	K02178
ncbi_111060179
ncbi_111060185	K01869
ncbi_111060186	K04448																												K04448	K04448	K04448	K04448	K04448	K04448	K04448	K04448	K04448	K04448	K04448	K04448	K04448	K04448	K04448	K04448	K04448	K04448	K04448	K04448	K04448
ncbi_111060215
ncbi_111060231
ncbi_111060240
ncbi_111060247
ncbi_111060253
ncbi_111060279
ncbi_111060311	K00624
ncbi_111060316
ncbi_111060342
ncbi_111060422
ncbi_111060486
ncbi_111060544
ncbi_111060553
ncbi_111060628
ncbi_111060684
ncbi_111060833
ncbi_111060859	K10951
ncbi_111060878
ncbi_111060998
ncbi_111061086	K06237
ncbi_111061101
ncbi_111061119	K06631
ncbi_111061281	K01379
ncbi_111061318
ncbi_111061390
ncbi_111061470
ncbi_111061519	K13356
ncbi_111061525
ncbi_111061539
ncbi_111061661
ncbi_111061740	K11252
ncbi_111061823	K13885
ncbi_111061930
ncbi_111062000
ncbi_111062201
ncbi_111062226
ncbi_111062391
ncbi_111062424
ncbi_111062487
ncbi_111062491
ncbi_111062512
ncbi_111062549	K11716
ncbi_111062619	K00254
ncbi_111062625
ncbi_111062740
ncbi_111062818	K00844
ncbi_111062864
ncbi_111062893
ncbi_111062962	K11138
ncbi_111063136	K13248
ncbi_111063151	K11252
ncbi_111063158
ncbi_111063213
ncbi_111063243
ncbi_111063278
ncbi_111063320	K23010
ncbi_111063374
ncbi_111063394
ncbi_111063609
ncbi_111063661
ncbi_111063742
ncbi_111063835	K20692
ncbi_111063867
ncbi_111063876
ncbi_111063930	K11252
ncbi_111064034	K10593
ncbi_111064125
ncbi_111064167
ncbi_111064220	K09542
ncbi_111064223	K11142
ncbi_111064224
ncbi_111064232
ncbi_111064319
ncbi_111064388
ncbi_111064393
ncbi_111064431
ncbi_111064450
ncbi_111064462
ncbi_111064535	K11142
ncbi_111064557
ncbi_111064604
ncbi_111064620
ncbi_120348717
ncbi_120348766
ncbi_120348821	K00927
ncbi_120348871
ncbi_120348964	K03955
ncbi_120348998
ncbi_120349099
ncbi_120349329	K04564
ncbi_120349368	K07374
ncbi_120349479
ncbi_120349779	K22329
ncbi_120349827
ncbi_120349858
ncbi_120349883
ncbi_120349890
ncbi_120350005
ncbi_120350011
ncbi_120350033	K01869
ncbi_120350044
ncbi_120350085	K14636
ncbi_120350117	K11411
ncbi_120350258
ncbi_120350339
ncbi_120350475
ncbi_120350529
ncbi_120350579
ncbi_120350645
ncbi_120350792	K09228
ncbi_120350818
ncbi_120350888
ncbi_120350939
ncbi_120350960
ncbi_120351067	K12173
ncbi_120351110
ncbi_120351148
ncbi_120351193
ncbi_120351195	K13421
ncbi_120351236	K00657
ncbi_120351267
ncbi_120351286
ncbi_120351287
ncbi_120351307
ncbi_120351384	K13131
ncbi_120351561
ncbi_120351573	K11254
ncbi_120351712
ncbi_120351766
ncbi_120351873
ncbi_120352165
ncbi_120352180
ncbi_120352281
ncbi_120352282
ncbi_120352292
ncbi_120352554	K01379
ncbi_120352635
ncbi_120352733	K04405
ncbi_120352819
ncbi_120352871
ncbi_120353060
ncbi_120353061
ncbi_120353153
ncbi_120353227
ncbi_120353229
ncbi_120353287
ncbi_120353303
ncbi_120353520
ncbi_120353609
ncbi_120353669
ncbi_120353693
ncbi_120353699
ncbi_120353783
ncbi_120353870
ncbi_120353965
ncbi_120354276
ncbi_120354358
ncbi_120354481
ncbi_120354629
ncbi_120354884	K00002
ncbi_120354917
ncbi_120355309
ncbi_120355310
ncbi_120355433	K06671
ncbi_120355481
ncbi_120355484
ncbi_120355487	K11142
ncbi_120355505
ncbi_120355616	K10408
ncbi_120355691
ncbi_120355703
ncbi_120355777
ncbi_120355882	K11252
ncbi_120355946
ncbi_120355961
ncbi_120355984
ncbi_120356101
ncbi_120356146	K08341
ncbi_120356148	K14616
ncbi_120356171
ncbi_120356176
ncbi_120356187
ncbi_120356231	K03037
ncbi_120356269
ncbi_120356309	K17608
ncbi_120356357	K10772
ncbi_120356369	K00290
ncbi_120356460	K00802
ncbi_120356489	K11140
ncbi_120356505	K03040
ncbi_120356538
ncbi_120356547	K12035
ncbi_120356566
ncbi_120356574
ncbi_120356635
ncbi_120356705
[truncated: 22 more columns]

## Sheet: Sheet3
GeneID	GO Component	GO Function	GO Process
MSTRG.1110	-	-	-
MSTRG.14771	-	-	-
MSTRG.15430	-	-	-
MSTRG.19141	-	-	-
MSTRG.20211	-	-	-
MSTRG.20348	-	-	-
MSTRG.26197	-	-	-
MSTRG.26218	-	-	-
MSTRG.26861	-	-	-
MSTRG.447	-	-	-
MSTRG.5470	-	-	-
ncbi_111043287	-	-	-
ncbi_111043308	-	GO:0003824//catalytic activity	-
ncbi_111043313	-	-	-
ncbi_111043427	-	-	-
ncbi_111043519	-	-	-
ncbi_111043532	-	-	-
ncbi_111043545	-	-	-
ncbi_111043556	GO:0016020//membrane	GO:0004563//beta-N-acetylhexosaminidase activity	GO:0006464//cellular protein modification process;GO:0006726//eye pigment biosynthetic process;GO:0009311//oligosaccharide metabolic process
ncbi_111043593	-	-	-
ncbi_111043596	-	-	-
ncbi_111043673	-	-	-
ncbi_111043678	-	-	-
ncbi_111043697	-	-	-
ncbi_111043705	-	-	-
ncbi_111043712	-	-	-
ncbi_111043797	-	GO:0003824//catalytic activity	-
ncbi_111043803	-	-	-
ncbi_111043853	-	-	-
ncbi_111043950	GO:0031224//intrinsic component of membrane;GO:0031985//Golgi cisterna	GO:0005402//cation:sugar symporter activity;GO:0008514//organic anion transmembrane transporter activity;GO:0015165//pyrimidine nucleotide-sugar transmembrane transporter activity	GO:0006818//hydrogen transport;GO:0006862//nucleotide transport;GO:0008645//hexose transport;GO:0015711//organic anion transport
ncbi_111043964	-	-	-
ncbi_111044034	-	-	-
ncbi_111044100	-	-	-
ncbi_111044180	-	GO:0016788//hydrolase activity, acting on ester bonds	-
ncbi_111044214	GO:0005815//microtubule organizing center;GO:0015629//actin cytoskeleton;GO:0016020//membrane;GO:0030286//dynein complex;GO:0043231//intracellular membrane-bounded organelle;GO:0044441//ciliary part;GO:0044444//cytoplasmic part	GO:0005515//protein binding;GO:0016887//ATPase activity	GO:0002478//antigen processing and presentation of exogenous peptide antigen;GO:0007017//microtubule-based process;GO:0008038//neuron recognition;GO:0035556//intracellular signal transduction;GO:1900739//regulation of protein insertion into mitochondrial membrane involved in apoptotic signaling pathway
ncbi_111044232	GO:0016021//integral component of membrane	GO:0000030//mannosyltransferase activity	GO:0001743//optic placode formation;GO:0002066//columnar/cuboidal epithelial cell development;GO:0007281//germ cell development;GO:0007619//courtship behavior;GO:0007621//negative regulation of female receptivity;GO:0016334//establishment or maintenance of polarity of follicular epithelium;GO:0043900//regulation of multi-organism process;GO:0044765//single-organism transport;GO:0051674//localizat…
ncbi_111044264	GO:0031224//intrinsic component of membrane	GO:0004312//fatty acid synthase activity	GO:0006633//fatty acid biosynthetic process
ncbi_111044266	-	GO:0016829//lyase activity	GO:0044763//single-organism cellular process
ncbi_111044309	-	GO:0004702//receptor signaling protein serine/threonine kinase activity;GO:0032550//purine ribonucleoside binding	GO:0001738//morphogenesis of a polarized epithelium;GO:0003002//regionalization;GO:0006464//cellular protein modification process;GO:0006796//phosphate-containing compound metabolic process;GO:0008582//regulation of synaptic growth at neuromuscular junction;GO:0009629//response to gravity;GO:0009886//post-embryonic morphogenesis;GO:0009968//negative regulation of signal transduction;GO:0035114//i…
ncbi_111044381	-	-	-
ncbi_111044383	-	-	-
ncbi_111044422	GO:0005739//mitochondrion;GO:0019866//organelle inner membrane;GO:0043234//protein complex;GO:0044425//membrane part	-	GO:0006091//generation of precursor metabolites and energy;GO:0010467//gene expression;GO:0044710//single-organism metabolic process;GO:0044763//single-organism cellular process
ncbi_111044455	-	-	GO:0007275//multicellular organism development
ncbi_111044492	-	GO:0019899//enzyme binding	GO:0044763//single-organism cellular process
ncbi_111044586	-	-	-
ncbi_111044590	-	GO:0016628//oxidoreductase activity, acting on the CH-CH group of donors, NAD or NADP as acceptor	GO:0008152//metabolic process
ncbi_111044684	-	-	GO:0044699//single-organism process
ncbi_111044686	-	-	-
ncbi_111044689	-	GO:0004674//protein serine/threonine kinase activity;GO:0032550//purine ribonucleoside binding	GO:0006464//cellular protein modification process;GO:0006796//phosphate-containing compound metabolic process
ncbi_111044690	GO:0033176//proton-transporting V-type ATPase complex	GO:0022857//transmembrane transporter activity;GO:0097159//organic cyclic compound binding	GO:0044763//single-organism cellular process
ncbi_111044817	-	-	-
ncbi_111044840	-	-	-
ncbi_111044861	-	-	-
ncbi_111044863	-	-	-
ncbi_111044869	-	-	-
ncbi_111044875	-	GO:0070011//peptidase activity, acting on L-amino acid peptides	-
ncbi_111045022	-	-	-
ncbi_111045030	-	-	-
ncbi_111045055	GO:0030312//external encapsulating structure	GO:0016491//oxidoreductase activity	GO:0044710//single-organism metabolic process;GO:0071704//organic substance metabolic process
ncbi_111045056	-	GO:0016614//oxidoreductase activity, acting on CH-OH group of donors	GO:0035209//pupal development;GO:0046692//sperm competition
ncbi_111045060	GO:0043231//intracellular membrane-bounded organelle	-	-
ncbi_111045197	-	-	-
ncbi_111045247	GO:0031988//membrane-bounded vesicle;GO:0043231//intracellular membrane-bounded organelle	GO:0003712//transcription cofactor activity;GO:0003723//RNA binding;GO:0004842//ubiquitin-protein transferase activity;GO:0036094//small molecule binding;GO:0044389//ubiquitin-like protein ligase binding;GO:0055106//ubiquitin-protein transferase regulator activity	GO:0000209//protein polyubiquitination;GO:0010468//regulation of gene expression;GO:0010822//positive regulation of mitochondrion organization;GO:0019941//modification-dependent protein catabolic process;GO:0022402//cell cycle process;GO:0031398//positive regulation of protein ubiquitination;GO:0032870//cellular response to hormone stimulus;GO:0034645//cellular macromolecule biosynthetic process;…
ncbi_111045303	GO:0005576//extracellular region	-	GO:0006955//immune response;GO:0042742//defense response to bacterium
ncbi_111045397	-	GO:0019829//cation-transporting ATPase activity;GO:0032550//purine ribonucleoside binding	GO:0006826//iron ion transport
ncbi_111045417	GO:0000776//kinetochore;GO:0005924//cell-substrate adherens junction;GO:0008287//protein serine/threonine phosphatase complex;GO:0016604//nuclear body;GO:0031966//mitochondrial membrane;GO:0032155//cell division site part;GO:0035097//histone methyltransferase complex;GO:0044309//neuron spine	GO:0003723//RNA binding;GO:0004721//phosphoprotein phosphatase activity;GO:0019900//kinase binding;GO:0043169//cation binding	GO:0000087//mitotic M phase;GO:0000278//mitotic cell cycle;GO:0006073//cellular glucan metabolic process;GO:0006464//cellular protein modification process;GO:0006641//triglyceride metabolic process;GO:0006796//phosphate-containing compound metabolic process;GO:0006913//nucleocytoplasmic transport;GO:0007623//circadian rhythm;GO:0009648//photoperiodism;GO:0017015//regulation of transforming growth…
ncbi_111045419	-	-	-
ncbi_111045434	-	-	-
ncbi_111045443	-	-	-
ncbi_111045476	GO:0005578//proteinaceous extracellular matrix	-	GO:0007166//cell surface receptor signaling pathway
ncbi_111045500	-	-	GO:0048731//system development;GO:0065007//biological regulation
ncbi_111045504	-	-	GO:0048731//system development;GO:0065007//biological regulation
ncbi_111045609	-	-	-
ncbi_111045698	GO:0005815//microtubule organizing center;GO:0031981//nuclear lumen;GO:0031988//membrane-bounded vesicle;GO:0044441//ciliary part;GO:0044444//cytoplasmic part	GO:0004690//cyclic nucleotide-dependent protein kinase activity;GO:0032550//purine ribonucleoside binding;GO:0044389//ubiquitin-like protein ligase binding;GO:0046872//metal ion binding	GO:0002220//innate immune response activating cell surface receptor signaling pathway;GO:0003014//renal system process;GO:0006006//glucose metabolic process;GO:0006641//triglyceride metabolic process;GO:0007187//G-protein coupled receptor signaling pathway, coupled to cyclic nucleotide second messenger;GO:0007267//cell-cell signaling;GO:0007599//hemostasis;GO:0010646//regulation of cell communica…
ncbi_111045729	-	-	-
ncbi_111045732	GO:0016020//membrane	-	GO:0051234//establishment of localization
ncbi_111045767	-	-	-
ncbi_111045884	GO:0005737//cytoplasm	GO:0005515//protein binding;GO:0008233//peptidase activity	GO:0006508//proteolysis;GO:0009987//cellular process
ncbi_111045962	GO:0031224//intrinsic component of membrane	-	-
ncbi_111045966	-	-	-
ncbi_111045973	-	-	-
ncbi_111046033	-	-	-
ncbi_111046103	-	-	-
ncbi_111046108	GO:0015629//actin cytoskeleton	GO:0017111//nucleoside-triphosphatase activity;GO:0032550//purine ribonucleoside binding	GO:0050794//regulation of cellular process
ncbi_111046119	-	GO:0046872//metal ion binding	-
ncbi_111046152	-	-	-
ncbi_111046157	GO:0016020//membrane	GO:0022857//transmembrane transporter activity	GO:0044763//single-organism cellular process;GO:0044765//single-organism transport;GO:0050789//regulation of biological process
ncbi_111046227	GO:0005856//cytoskeleton;GO:0031981//nuclear lumen	GO:0003712//transcription cofactor activity;GO:0005515//protein binding;GO:0036459//thiol-dependent ubiquitinyl hydrolase activity;GO:0070011//peptidase activity, acting on L-amino acid peptides	GO:0006357//regulation of transcription from RNA polymerase II promoter;GO:0016477//cell migration;GO:0035521//monoubiquitinated histone deubiquitination;GO:0042634//regulation of hair cycle
ncbi_111046285	-	-	-
ncbi_111046290	-	-	-
ncbi_111046317	-	-	-
ncbi_111046320	-	GO:0004519//endonuclease activity;GO:0005488//binding	GO:0090304//nucleic acid metabolic process
ncbi_111046329	-	GO:0003824//catalytic activity	-
ncbi_111046331	-	-	-
ncbi_111046377	-	-	-
ncbi_111046387	-	-	-
ncbi_111046398	-	-	-
ncbi_111046415	GO:0016021//integral component of membrane	GO:0004930//G-protein coupled receptor activity	GO:0007186//G-protein coupled receptor signaling pathway;GO:0044267//cellular protein metabolic process
ncbi_111046480	-	-	-
ncbi_111046503	-	-	-
ncbi_111046523	-	GO:0046872//metal ion binding	-
ncbi_111046569	-	-	-
ncbi_111046604	GO:0016020//membrane;GO:0043232//intracellular non-membrane-bounded organelle;GO:0043234//protein complex;GO:0044429//mitochondrial part	GO:0005216//ion channel activity;GO:0005515//protein binding	GO:0006820//anion transport;GO:0007005//mitochondrion organization;GO:0007154//cell communication;GO:0032502//developmental process;GO:0044700//single organism signaling;GO:0050794//regulation of cellular process;GO:0050896//response to stimulus;GO:0055085//transmembrane transport
ncbi_111046632	-	-	-
ncbi_111046646	-	-	GO:0006810//transport
ncbi_111046667	GO:0030529//intracellular ribonucleoprotein complex;GO:0043231//intracellular membrane-bounded organelle	GO:0016903//oxidoreductase activity, acting on the aldehyde or oxo group of donors	GO:0006090//pyruvate metabolic process;GO:0010467//gene expression
ncbi_111046681	GO:0016020//membrane	GO:0005283//sodium:amino acid symporter activity;GO:0005310//dicarboxylic acid transmembrane transporter activity;GO:0015172//acidic amino acid transmembrane transporter activity;GO:0016772//transferase activity, transferring phosphorus-containing groups	GO:0009987//cellular process;GO:0044765//single-organism transport;GO:0071702//organic substance transport
ncbi_111046695	-	-	-
ncbi_111046700	-	-	-
ncbi_111046729	GO:0043234//protein complex	GO:0000166//nucleotide binding;GO:0001076//transcription factor activity, RNA polymerase II transcription factor binding;GO:0016627//oxidoreductase activity, acting on the CH-CH group of donors	GO:0006352//DNA-templated transcription, initiation;GO:0044710//single-organism metabolic process;GO:0048812//neuron projection morphogenesis
ncbi_111046792	-	-	-
ncbi_111046832	-	-	-
ncbi_111046864	-	-	-
ncbi_111046868	-	-	-
ncbi_111046872	GO:0043231//intracellular membrane-bounded organelle;GO:0044444//cytoplasmic part	GO:0005515//protein binding	GO:0006461//protein complex assembly;GO:0006915//apoptotic process;GO:0007005//mitochondrion organization;GO:0050794//regulation of cellular process;GO:0061024//membrane organization
ncbi_111046873	-	-	-
ncbi_111046881	-	GO:0016787//hydrolase activity	GO:0008152//metabolic process
ncbi_111046883	-	-	-
ncbi_111046889	-	-	-
ncbi_111046897	-	-	-
ncbi_111046898	-	-	-
ncbi_111046938	-	-	-
ncbi_111047063	-	-	-
ncbi_111047215	-	-	-
ncbi_111047218	-	-	-
ncbi_111047253	-	-	-
ncbi_111047255	-	-	-
ncbi_111047270	-	-	-
ncbi_111047271	-	-	-
ncbi_111047276	-	-	GO:0019098//reproductive behavior;GO:0051707//response to other organism
ncbi_111047340	GO:0005815//microtubule organizing center;GO:0042995//cell projection;GO:0043231//intracellular membrane-bounded organelle	-	GO:0042516//regulation of tyrosine phosphorylation of Stat3 protein;GO:0072595//maintenance of protein localization in organelle;GO:2001141//regulation of RNA biosynthetic process
ncbi_111047392	-	-	-
ncbi_111047473	-	-	-
ncbi_111047502	-	-	-
ncbi_111047513	-	-	-
ncbi_111047580	-	-	-
ncbi_111047586	GO:0043234//protein complex	-	GO:0006796//phosphate-containing compound metabolic process;GO:0035114//imaginal disc-derived appendage morphogenesis
ncbi_111047675	-	-	GO:0048513//animal organ development
ncbi_111047688	-	GO:0016787//hydrolase activity	-
ncbi_111047732	-	-	-
ncbi_111047751	-	-	-
ncbi_111047800	GO:0019866//organelle inner membrane;GO:0043231//intracellular membrane-bounded organelle	GO:0005488//binding	GO:0001101//response to acid chemical;GO:0001678//cellular glucose homeostasis;GO:0001889//liver development;GO:0006818//hydrogen transport;GO:0009267//cellular response to starvation;GO:0009746//response to hexose;GO:0022900//electron transport chain;GO:0032845//negative regulation of homeostatic process;GO:0032868//response to insulin;GO:0042391//regulation of membrane potential;GO:0042981//reg…
ncbi_111047866	-	GO:0003824//catalytic activity	-
ncbi_111047895	-	-	-
ncbi_111047999	-	GO:0016778//diphosphotransferase activity	GO:0009117//nucleotide metabolic process
ncbi_111048009	-	GO:0016787//hydrolase activity	-
ncbi_111048018	-	-	-
ncbi_111048023	-	GO:0008168//methyltransferase activity	GO:0009451//RNA modification;GO:0016441//posttranscriptional gene silencing
ncbi_111048067	-	-	-
ncbi_111048151	-	-	-
ncbi_111048164	-	-	-
ncbi_111048166	-	-	-
ncbi_111048195	-	-	-
ncbi_111048198	-	-	-
ncbi_111048231	GO:0044444//cytoplasmic part	GO:0032403//protein complex binding	-
ncbi_111048236	-	-	-
ncbi_111048296	GO:0033267//axon part	GO:0004672//protein kinase activity;GO:0032550//purine ribonucleoside binding	GO:0006468//protein phosphorylation;GO:0007417//central nervous system development;GO:0007631//feeding behavior;GO:0008306//associative learning;GO:0008582//regulation of synaptic growth at neuromuscular junction;GO:0009416//response to light stimulus;GO:0035330//regulation of hippo signaling;GO:0045807//positive regulation of endocytosis;GO:0048511//rhythmic process
ncbi_111048310	-	-	-
ncbi_111048337	-	GO:0016616//oxidoreductase activity, acting on the CH-OH group of donors, NAD or NADP as acceptor;GO:0043168//anion binding;GO:0048037//cofactor binding	GO:0032787//monocarboxylic acid metabolic process
ncbi_111048416	GO:0005924//cell-substrate adherens junction;GO:0016020//membrane;GO:0032991//macromolecular complex	GO:0005488//binding	GO:0030336//negative regulation of cell migration;GO:0035385//Roundabout signaling pathway
ncbi_111048427	GO:0043231//intracellular membrane-bounded organelle	-	GO:0009895//negative regulation of catabolic process;GO:0033365//protein localization to organelle
ncbi_111048431	-	-	-
ncbi_111048504	-	-	-
ncbi_111048564	-	-	-
ncbi_111048587	-	-	GO:0008152//metabolic process
ncbi_111048626	-	-	-
ncbi_111048650	-	-	GO:0000003//reproduction
ncbi_111048704	-	-	-
ncbi_111048713	-	GO:0016740//transferase activity	-
ncbi_111048714	-	-	-
ncbi_111048726	GO:0043234//protein complex;GO:0044424//intracellular part	-	GO:0000956//nuclear-transcribed mRNA catabolic process;GO:0007626//locomotory behavior;GO:0009314//response to radiation
ncbi_111048735	-	GO:0016787//hydrolase activity	-
ncbi_111048749	-	-	-
ncbi_111048782	-	-	-
ncbi_111048799	GO:0031988//membrane-bounded vesicle;GO:0044444//cytoplasmic part	GO:0003723//RNA binding;GO:0005515//protein binding	GO:0008016//regulation of heart contraction;GO:0009987//cellular process;GO:0010611//regulation of cardiac muscle hypertrophy;GO:0019538//protein metabolic process;GO:0055076//transition metal ion homeostasis
ncbi_111048844	-	-	-
ncbi_111048875	-	GO:0016740//transferase activity	GO:0002009//morphogenesis of an epithelium;GO:0044763//single-organism cellular process;GO:0048731//system development
ncbi_111048878	-	GO:0016787//hydrolase activity	-
ncbi_111048910	-	-	-
ncbi_111048913	-	-	-
ncbi_111048958	-	-	-
ncbi_111048961	-	-	GO:0044237//cellular metabolic process
ncbi_111049012	-	-	-
ncbi_111049027	-	-	-
ncbi_111049066	-	-	-
ncbi_111049131	GO:0044444//cytoplasmic part	-	GO:0010467//gene expression;GO:0016070//RNA metabolic process;GO:0044763//single-organism cellular process;GO:0050794//regulation of cellular process
ncbi_111049140	GO:0043234//protein complex;GO:0044446//intracellular organelle part	-	GO:0044710//single-organism metabolic process
ncbi_111049168	-	-	-
ncbi_111049249	-	-	-
ncbi_111049250	-	-	-
ncbi_111049255	-	GO:0008233//peptidase activity	-
ncbi_111049287	-	-	-
ncbi_111049320	-	GO:0004713//protein tyrosine kinase activity	GO:0006468//protein phosphorylation
ncbi_111049327	-	-	-
ncbi_111049362	-	-	-
ncbi_111049370	-	-	GO:0044237//cellular metabolic process
ncbi_111049383	-	GO:0016714//oxidoreductase activity, acting on paired donors, with incorporation or reduction of molecular oxygen, reduced pteridine as one donor, and incorporation of one atom of oxygen;GO:0031406//carboxylic acid binding;GO:0046914//transition metal ion binding	GO:0006520//cellular amino acid metabolic process;GO:0006950//response to stress;GO:0007427//epithelial cell migration, open tracheal system;GO:0007444//imaginal disc development;GO:0007564//regulation of chitin-based cuticle tanning;GO:0007619//courtship behavior;GO:0007626//locomotory behavior;GO:0009266//response to temperature stimulus;GO:0042069//regulation of catecholamine metabolic process…
ncbi_111049389	-	-	-
ncbi_111049445	-	-	-
ncbi_111049513	-	-	-
ncbi_111049563	-	GO:0016740//transferase activity	GO:0006633//fatty acid biosynthetic process;GO:0030154//cell differentiation;GO:0035556//intracellular signal transduction
ncbi_111049579	-	-	-
ncbi_111049611	-	-	-
ncbi_111049626	-	-	-
ncbi_111049631	-	-	GO:0006464//cellular protein modification process
ncbi_111049652	-	GO:0016791//phosphatase activity	GO:0006470//protein dephosphorylation
ncbi_111049686	-	-	-
ncbi_111049689	GO:0016020//membrane;GO:0031988//membrane-bounded vesicle;GO:0043231//intracellular membrane-bounded organelle	GO:0003824//catalytic activity	GO:0006195//purine nucleotide catabolic process;GO:0010468//regulation of gene expression;GO:0072331//signal transduction by p53 class mediator
ncbi_111049707	-	-	-
ncbi_111049781	-	-	-
ncbi_111049819	-	-	-
ncbi_111049850	-	-	-
ncbi_111049904	-	-	-
ncbi_111049915	-	-	-
ncbi_111049942	GO:0005737//cytoplasm;GO:0015630//microtubule cytoskeleton;GO:0044430//cytoskeletal part	GO:0005515//protein binding	GO:0000226//microtubule cytoskeleton organization;GO:0050794//regulation of cellular process
ncbi_111050065	GO:0005858//axonemal dynein complex	GO:0003774//motor activity;GO:0036094//small molecule binding;GO:0097159//organic cyclic compound binding;GO:1901363//heterocyclic compound binding	GO:0048870//cell motility
ncbi_111050302	GO:0031224//intrinsic component of membrane	GO:0005261//cation channel activity;GO:0046983//protein dimerization activity	GO:0034220//ion transmembrane transport
ncbi_111050324	-	-	-
ncbi_111050327	-	-	-
ncbi_111050333	GO:0016020//membrane	-	-
ncbi_111050370	-	-	-
ncbi_111050388	-	-	GO:0044699//single-organism process;GO:0050896//response to stimulus
ncbi_111050414	-	-	-
ncbi_111050438	-	-	-
ncbi_111050469	-	-	-
ncbi_111050478	-	-	-
ncbi_111050528	-	-	-
ncbi_111050536	-	-	-
ncbi_111050577	-	-	-
ncbi_111050691	-	-	-
ncbi_111050706	GO:0044451//nucleoplasm part	GO:0032550//purine ribonucleoside binding;GO:0042623//ATPase activity, coupled	GO:0006352//DNA-templated transcription, initiation;GO:0006412//translation
ncbi_111050791	-	-	-
ncbi_111050813	GO:0043234//protein complex;GO:0044444//cytoplasmic part	GO:0004601//peroxidase activity	GO:0003006//developmental process involved in reproduction;GO:0010259//multicellular organism aging;GO:0016477//cell migration;GO:0019725//cellular homeostasis;GO:0022610//biological adhesion;GO:0033554//cellular response to stress;GO:0042743//hydrogen peroxide metabolic process;GO:0044710//single-organism metabolic process
ncbi_111050819	-	-	-
ncbi_111050821	-	-	-
ncbi_111050866	-	-	-
ncbi_111050881	-	-	-
ncbi_111050882	-	GO:0003824//catalytic activity	-
ncbi_111051007	-	-	-
ncbi_111051013	-	-	-
ncbi_111051124	-	-	-
ncbi_111051137	-	GO:0046872//metal ion binding	-
ncbi_111051261	GO:0044424//intracellular part	GO:0004812//aminoacyl-tRNA ligase activity;GO:0032550//purine ribonucleoside binding;GO:0052689//carboxylic ester hydrolase activity	GO:0006418//tRNA aminoacylation for protein translation;GO:0006448//regulation of translational elongation
ncbi_111051306	-	-	-
ncbi_111051318	-	-	GO:0007275//multicellular organism development;GO:0048856//anatomical structure development
ncbi_111051368	-	-	-
ncbi_111051406	-	-	-
ncbi_111051414	-	-	-
ncbi_111051435	-	-	-
ncbi_111051452	-	-	-
ncbi_111051566	-	-	-
ncbi_111051651	-	-	-
ncbi_111051680	-	-	-
ncbi_111051698	-	-	-
ncbi_111051699	-	-	-
ncbi_111051700	-	-	-
ncbi_111051725	GO:0044464//cell part	GO:0005102//receptor binding	-
ncbi_111051745	-	-	-
ncbi_111051778	-	-	-
ncbi_111051810	GO:0043005//neuron projection;GO:0044425//membrane part	GO:0005310//dicarboxylic acid transmembrane transporter activity;GO:0005343//organic acid:sodium symporter activity	GO:0009416//response to light stimulus;GO:0015813//L-glutamate transport;GO:0042221//response to chemical;GO:0043090//amino acid import;GO:0044763//single-organism cellular process;GO:0048731//system development
ncbi_111051820	-	GO:0003824//catalytic activity	GO:0044237//cellular metabolic process
ncbi_111051860	-	-	-
ncbi_111051862	GO:0005815//microtubule organizing center;GO:0005819//spindle	GO:0005488//binding	GO:0022029//telencephalon cell migration
ncbi_111051964	-	-	-
ncbi_111052014	-	-	-
ncbi_111052066	-	-	GO:0006351//transcription, DNA-templated
ncbi_111052159	-	-	-
ncbi_111052170	GO:0044464//cell part	-	-
ncbi_111052271	-	-	-
ncbi_111052314	-	GO:0016831//carboxy-lyase activity	GO:0007626//locomotory behavior;GO:0030534//adult behavior;GO:0033057//multicellular organism reproductive behavior
ncbi_111052342	-	-	-
ncbi_111052404	-	-	-
ncbi_111052460	-	-	-
ncbi_111052550	-	GO:0003824//catalytic activity	-
ncbi_111052612	GO:0000785//chromatin;GO:0043189//H4/H2A histone acetyltransferase complex	GO:0003676//nucleic acid binding;GO:0046914//transition metal ion binding;GO:0046983//protein dimerization activity	GO:0006325//chromatin organization
ncbi_111052701	-	-	-
ncbi_111052743	-	-	-
ncbi_111052808	-	-	-
ncbi_111052953	-	-	-
ncbi_111052954	-	-	-
ncbi_111053035	GO:0016020//membrane;GO:0044424//intracellular part	GO:0004690//cyclic nucleotide-dependent protein kinase activity;GO:0032550//purine ribonucleoside binding	GO:0001654//eye development;GO:0006464//cellular protein modification process;GO:0006796//phosphate-containing compound metabolic process;GO:0006915//apoptotic process;GO:0007017//microtubule-based process;GO:0007268//synaptic transmission;GO:0007309//oocyte axis specification;GO:0007447//imaginal disc pattern formation;GO:0007613//memory;GO:0007626//locomotory behavior;GO:0008306//associative le…
ncbi_111053071	-	-	-
ncbi_111053117	-	-	-
ncbi_111053123	-	-	-
ncbi_111053148	-	-	-
ncbi_111053180	-	-	-
ncbi_111053283	-	-	-
ncbi_111053286	-	-	-
ncbi_111053316	-	-	-
ncbi_111053344	-	-	-
ncbi_111053346	-	-	-
ncbi_111053359	-	-	-
ncbi_111053362	-	GO:0005488//binding	GO:0044238//primary metabolic process;GO:0044260//cellular macromolecule metabolic process;GO:0050794//regulation of cellular process;GO:0051716//cellular response to stimulus
ncbi_111053425	-	-	-
ncbi_111053431	GO:0031224//intrinsic component of membrane	GO:0016491//oxidoreductase activity	GO:0044238//primary metabolic process;GO:0044710//single-organism metabolic process
ncbi_111053443	-	GO:0016616//oxidoreductase activity, acting on the CH-OH group of donors, NAD or NADP as acceptor	GO:0008152//metabolic process
ncbi_111053477	-	-	-
ncbi_111053478	-	-	-
ncbi_111053504	-	-	-
ncbi_111053527	GO:0043231//intracellular membrane-bounded organelle;GO:0043234//protein complex	GO:0001071//nucleic acid binding transcription factor activity;GO:0003676//nucleic acid binding;GO:0019904//protein domain specific binding;GO:0046983//protein dimerization activity	GO:0006355//regulation of transcription, DNA-templated;GO:0007431//salivary gland development;GO:0016458//gene silencing;GO:0035166//post-embryonic hemopoiesis;GO:0035239//tube morphogenesis
ncbi_111053535	-	-	-
ncbi_111053602	-	-	-
ncbi_111053613	GO:0044424//intracellular part	-	-
ncbi_111053717	-	-	-
ncbi_111053731	-	-	-
ncbi_111053795	-	-	-
ncbi_111053891	GO:0031224//intrinsic component of membrane	GO:0008324//cation transmembrane transporter activity	GO:0001558//regulation of cell growth;GO:0006812//cation transport;GO:0040014//regulation of multicellular organism growth;GO:0048598//embryonic morphogenesis
ncbi_111053907	-	-	-
ncbi_111053947	GO:0043229//intracellular organelle	GO:0097159//organic cyclic compound binding;GO:1901363//heterocyclic compound binding	-
ncbi_111053981	-	-	-
ncbi_111054131	-	-	-
ncbi_111054155	-	-	-
ncbi_111054162	GO:0043231//intracellular membrane-bounded organelle;GO:0043232//intracellular non-membrane-bounded organelle;GO:0043234//protein complex	GO:0005515//protein binding;GO:0032550//purine ribonucleoside binding	GO:0001101//response to acid chemical;GO:0006950//response to stress;GO:0010259//multicellular organism aging;GO:0030154//cell differentiation;GO:0044267//cellular protein metabolic process
ncbi_111054170	GO:0031224//intrinsic component of membrane	GO:0003824//catalytic activity;GO:0005548//phospholipid transporter activity;GO:0032550//purine ribonucleoside binding;GO:0046872//metal ion binding	GO:0015914//phospholipid transport
ncbi_111054200	-	-	-
ncbi_111054254	-	-	-
ncbi_111054255	-	-	-
ncbi_111054263	-	GO:0097367//carbohydrate derivative binding	GO:0006022//aminoglycan metabolic process
ncbi_111054266	GO:0043231//intracellular membrane-bounded organelle	GO:0016740//transferase activity	-
ncbi_111054271	-	-	-
ncbi_111054320	GO:0031988//membrane-bounded vesicle;GO:0044421//extracellular region part;GO:0044444//cytoplasmic part	GO:0032934//sterol binding	GO:0001953//negative regulation of cell-matrix adhesion;GO:0006979//response to oxidative stress;GO:0008285//negative regulation of cell proliferation;GO:0009611//response to wounding;GO:0009968//negative regulation of signal transduction;GO:0019318//hexose metabolic process;GO:0032682//negative regulation of chemokine production;GO:0034443//negative regulation of lipoprotein oxidation;GO:0042306…
ncbi_111054332	GO:0044424//intracellular part	-	-
ncbi_111054340	-	-	-
ncbi_111054389	-	-	-
ncbi_111054391	-	-	-
ncbi_111054465	GO:0005777//peroxisome	GO:0016620//oxidoreductase activity, acting on the aldehyde or oxo group of donors, NAD or NADP as acceptor	-
ncbi_111054584	-	GO:0016491//oxidoreductase activity	-
ncbi_111054593	-	-	-
ncbi_111054657	-	-	-
ncbi_111054673	-	-	-
ncbi_111054704	-	-	-
ncbi_111054729	-	-	-
ncbi_111054738	-	-	-
ncbi_111054744	GO:0044424//intracellular part	GO:0005506//iron ion binding;GO:0016724//oxidoreductase activity, oxidizing metal ions, oxygen as acceptor	GO:0000041//transition metal ion transport;GO:0044710//single-organism metabolic process;GO:0046916//cellular transition metal ion homeostasis
ncbi_111054769	GO:0043231//intracellular membrane-bounded organelle	-	-
ncbi_111054775	-	-	-
ncbi_111054798	-	-	-
ncbi_111054799	-	-	GO:0006897//endocytosis
ncbi_111055048	GO:0000776//kinetochore;GO:0005924//cell-substrate adherens junction;GO:0008287//protein serine/threonine phosphatase complex;GO:0016604//nuclear body;GO:0031966//mitochondrial membrane;GO:0032155//cell division site part;GO:0035097//histone methyltransferase complex;GO:0044309//neuron spine	GO:0003723//RNA binding;GO:0004721//phosphoprotein phosphatase activity;GO:0019900//kinase binding;GO:0043169//cation binding	GO:0000087//mitotic M phase;GO:0000278//mitotic cell cycle;GO:0006073//cellular glucan metabolic process;GO:0006470//protein dephosphorylation;GO:0006641//triglyceride metabolic process;GO:0006913//nucleocytoplasmic transport;GO:0007623//circadian rhythm;GO:0009648//photoperiodism;GO:0017015//regulation of transforming growth factor beta receptor signaling pathway;GO:0030154//cell differentiation…
ncbi_111055082	-	-	-
ncbi_111055124	-	-	-
ncbi_111055154	-	-	-
ncbi_111055171	-	-	-
ncbi_111055247	-	-	-
ncbi_111055257	GO:0031988//membrane-bounded vesicle;GO:0043232//intracellular non-membrane-bounded organelle;GO:0044425//membrane part	GO:0003823//antigen binding;GO:0015171//amino acid transmembrane transporter activity	GO:0002376//immune system process;GO:0007599//hemostasis;GO:0009620//response to fungus;GO:0015820//leucine transport;GO:0019752//carboxylic acid metabolic process;GO:0044767//single-organism developmental process;GO:0055085//transmembrane transport
ncbi_111055280	-	-	-
ncbi_111055340	-	GO:0003676//nucleic acid binding;GO:0046914//transition metal ion binding	-
ncbi_111055358	-	-	GO:0006897//endocytosis
ncbi_111055387	GO:0042579//microbody;GO:0043234//protein complex	GO:0000166//nucleotide binding;GO:0016614//oxidoreductase activity, acting on CH-OH group of donors;GO:0016726//oxidoreductase activity, acting on CH or CH2 groups, NAD or NADP as acceptor;GO:0046914//transition metal ion binding;GO:0050662//coenzyme binding;GO:0051536//iron-sulfur cluster binding	GO:0006145//purine nucleobase catabolic process;GO:0006586//indolalkylamine metabolic process;GO:0006644//phospholipid metabolic process;GO:0009064//glutamine family amino acid metabolic process;GO:0010259//multicellular organism aging
ncbi_111055398	-	-	-
ncbi_111055399	GO:0015630//microtubule cytoskeleton;GO:0032991//macromolecular complex	GO:0005198//structural molecule activity;GO:0017111//nucleoside-triphosphatase activity;GO:0032550//purine ribonucleoside binding	GO:0043623//cellular protein complex assembly;GO:0044763//single-organism cellular process
ncbi_111055477	-	-	-
ncbi_111055510	-	-	-
ncbi_111055591	-	-	-
ncbi_111055593	-	-	-
ncbi_111055620	-	GO:0046872//metal ion binding	-
ncbi_111055650	-	-	-
ncbi_111055669	-	-	-
ncbi_111055681	-	-	-
ncbi_111055754	GO:0016020//membrane	-	GO:0008038//neuron recognition
ncbi_111055838	-	-	-
ncbi_111055965	-	-	-
ncbi_111056001	GO:0044427//chromosomal part	GO:0003676//nucleic acid binding;GO:0008168//methyltransferase activity;GO:0046872//metal ion binding	GO:0001889//liver development;GO:0003407//neural retina development;GO:0006306//DNA methylation;GO:0006355//regulation of transcription, DNA-templated;GO:0009653//anatomical structure morphogenesis;GO:0010629//negative regulation of gene expression;GO:0031324//negative regulation of cellular metabolic process;GO:0034968//histone lysine methylation;GO:0035295//tube development;GO:0051052//regulati…
ncbi_111056011	-	-	-
ncbi_111056064	-	-	-
ncbi_111056144	-	-	-
ncbi_111056153	-	GO:0008252//nucleotidase activity;GO:0016462//pyrophosphatase activity	-
ncbi_111056164	-	-	-
ncbi_111056180	-	-	-
ncbi_111056195	-	-	-
ncbi_111056257	GO:0005849//mRNA cleavage factor complex;GO:0016020//membrane	-	GO:0006396//RNA processing;GO:0051353//positive regulation of oxidoreductase activity
ncbi_111056297	-	-	GO:0006631//fatty acid metabolic process;GO:0006637//acyl-CoA metabolic process;GO:0006641//triglyceride metabolic process;GO:0009968//negative regulation of signal transduction
ncbi_111056365	-	-	-
ncbi_111056397	-	-	-
ncbi_111056407	-	-	-
ncbi_111056511	-	-	-
ncbi_111056558	GO:0043234//protein complex	GO:0005515//protein binding	GO:0007033//vacuole organization;GO:0048284//organelle fusion
ncbi_111056596	-	-	-
ncbi_111056673	-	-	-
ncbi_111056702	-	-	-
ncbi_111056740	GO:0015630//microtubule cytoskeleton;GO:0031981//nuclear lumen;GO:0044430//cytoskeletal part	GO:0016791//phosphatase activity	GO:0006464//cellular protein modification process;GO:0016311//dephosphorylation
ncbi_111056784	-	-	-
ncbi_111056891	GO:0015630//microtubule cytoskeleton;GO:0032991//macromolecular complex	GO:0005198//structural molecule activity;GO:0017111//nucleoside-triphosphatase activity;GO:0032550//purine ribonucleoside binding	GO:0043623//cellular protein complex assembly;GO:0044763//single-organism cellular process
ncbi_111056976	-	GO:0016301//kinase activity	GO:0009987//cellular process;GO:0044699//single-organism process
ncbi_111056993	GO:0000139//Golgi membrane;GO:0031984//organelle subcompartment	GO:0008092//cytoskeletal protein binding;GO:1901981//phosphatidylinositol phosphate binding	GO:0008582//regulation of synaptic growth at neuromuscular junction;GO:0030534//adult behavior
ncbi_111057006	-	-	-
ncbi_111057031	-	GO:0005488//binding	-
ncbi_111057045	-	-	-
ncbi_111057162	-	-	-
ncbi_111057397	-	GO:0003824//catalytic activity	GO:0006006//glucose metabolic process;GO:0006090//pyruvate metabolic process
ncbi_111057432	GO:0043231//intracellular membrane-bounded organelle	GO:0003677//DNA binding	GO:0007365//periodic partitioning;GO:0010468//regulation of gene expression
ncbi_111057437	GO:0044464//cell part	GO:0015924//mannosyl-oligosaccharide mannosidase activity	GO:0006464//cellular protein modification process;GO:0009058//biosynthetic process;GO:0044723//single-organism carbohydrate metabolic process
ncbi_111057531	-	-	-
ncbi_111057609	-	-	-
ncbi_111057656	-	-	GO:0044710//single-organism metabolic process
ncbi_111057664	-	GO:0046914//transition metal ion binding;GO:0070011//peptidase activity, acting on L-amino acid peptides	GO:0019538//protein metabolic process
ncbi_111057689	-	-	-
ncbi_111057722	-	-	-
ncbi_111057825	-	-	-
ncbi_111057877	GO:0031090//organelle membrane;GO:0043231//intracellular membrane-bounded organelle	GO:0016712//oxidoreductase activity, acting on paired donors, with incorporation or reduction of molecular oxygen, reduced flavin or flavoprotein as one donor, and incorporation of one atom of oxygen;GO:0046906//tetrapyrrole binding;GO:0046914//transition metal ion binding	GO:0044710//single-organism metabolic process
ncbi_111057905	-	GO:0016787//hydrolase activity	GO:0005975//carbohydrate metabolic process
ncbi_111057950	-	-	-
ncbi_111057975	-	-	-
ncbi_111058034	-	-	-
ncbi_111058076	-	-	-
ncbi_111058094	-	-	-
ncbi_111058112	-	-	-
ncbi_111058179	-	-	-
ncbi_111058207	GO:0031224//intrinsic component of membrane	GO:0000166//nucleotide binding;GO:0046943//carboxylic acid transmembrane transporter activity	GO:0006865//amino acid transport;GO:0044710//single-organism metabolic process
ncbi_111058316	GO:0043231//intracellular membrane-bounded organelle	GO:0008378//galactosyltransferase activity	-
ncbi_111058429	-	GO:0016787//hydrolase activity	-
ncbi_111058481	GO:0044425//membrane part;GO:0044464//cell part	GO:0005488//binding	GO:0006950//response to stress;GO:0007613//memory;GO:0008104//protein localization;GO:0008306//associative learning
ncbi_111058532	-	GO:0005214//structural constituent of chitin-based cuticle	GO:0042335//cuticle development
ncbi_111058575	-	GO:0016709//oxidoreductase activity, acting on paired donors, with incorporation or reduction of molecular oxygen, NAD(P)H as one donor, and incorporation of one atom of oxygen	-
ncbi_111058611	-	-	-
ncbi_111058626	-	-	-
ncbi_111058682	-	-	GO:0006839//mitochondrial transport
ncbi_111058755	GO:0016020//membrane	-	GO:0006631//fatty acid metabolic process
ncbi_111058761	-	-	-
ncbi_111058784	GO:0005856//cytoskeleton;GO:0043231//intracellular membrane-bounded organelle;GO:0044441//ciliary part	-	GO:0007281//germ cell development;GO:0007420//brain development;GO:0048870//cell motility
ncbi_111058812	-	-	-
ncbi_111058864	-	-	-
ncbi_111058915	-	-	-
ncbi_111059089	-	-	-
ncbi_111059217	-	-	-
ncbi_111059222	-	-	-
ncbi_111059261	-	-	-
ncbi_111059291	-	GO:0016247//channel regulator activity	GO:0006814//sodium ion transport
ncbi_111059404	GO:0005700//polytene chromosome;GO:0005815//microtubule organizing center;GO:0016020//membrane;GO:0044444//cytoplasmic part	GO:0005515//protein binding;GO:0016887//ATPase activity;GO:0032550//purine ribonucleoside binding	GO:0001752//compound eye photoreceptor fate commitment;GO:0007051//spindle organization;GO:0007169//transmembrane receptor protein tyrosine kinase signaling pathway;GO:0007316//pole plasm RNA localization;GO:0008283//cell proliferation;GO:0009409//response to cold;GO:0010528//regulation of transposition;GO:0022604//regulation of cell morphogenesis;GO:0030036//actin cytoskeleton organization;GO:00…
ncbi_111059597	-	-	-
ncbi_111059698	-	-	-
ncbi_111059739	-	GO:0031267//small GTPase binding;GO:0046983//protein dimerization activity	GO:0009967//positive regulation of signal transduction;GO:0042051//compound eye photoreceptor development;GO:0042058//regulation of epidermal growth factor receptor signaling pathway
ncbi_111059786	-	-	-
ncbi_111059842	-	GO:0016787//hydrolase activity	GO:0007420//brain development
ncbi_111059885	-	-	-
ncbi_111059899	-	-	-
ncbi_111059918	GO:0016020//membrane;GO:0033267//axon part	-	GO:0007268//synaptic transmission;GO:0045161//neuronal ion channel clustering
ncbi_111059935	-	GO:0015929//hexosaminidase activity	GO:0044238//primary metabolic process;GO:0071704//organic substance metabolic process
ncbi_111059937	GO:0016020//membrane	GO:0016757//transferase activity, transferring glycosyl groups	GO:0044238//primary metabolic process;GO:0044710//single-organism metabolic process;GO:0044763//single-organism cellular process;GO:0050794//regulation of cellular process;GO:0071704//organic substance metabolic process
ncbi_111059957	-	-	-
ncbi_111059990	-	-	-
ncbi_111060035	-	GO:0004672//protein kinase activity;GO:0043167//ion binding	GO:0006468//protein phosphorylation;GO:0007165//signal transduction
ncbi_111060097	-	GO:0005488//binding	-
ncbi_111060134	-	GO:0016301//kinase activity	GO:0044237//cellular metabolic process;GO:0071173//spindle assembly checkpoint
ncbi_111060179	GO:0016020//membrane	-	-
ncbi_111060185	-	GO:0016874//ligase activity	GO:0006412//translation
ncbi_111060186	-	-	-
ncbi_111060215	-	-	-
ncbi_111060231	GO:0043229//intracellular organelle	GO:0003824//catalytic activity;GO:0043130//ubiquitin binding	GO:0000209//protein polyubiquitination;GO:0006281//DNA repair;GO:0019219//regulation of nucleobase-containing compound metabolic process;GO:0033522//histone H2A ubiquitination;GO:0060255//regulation of macromolecule metabolic process
ncbi_111060240	-	-	-
ncbi_111060247	-	-	-
ncbi_111060253	-	-	-
ncbi_111060279	-	-	-
ncbi_111060311	GO:0043231//intracellular membrane-bounded organelle;GO:0044444//cytoplasmic part	-	GO:0044710//single-organism metabolic process;GO:0071704//organic substance metabolic process
ncbi_111060316	GO:0031981//nuclear lumen;GO:0032991//macromolecular complex;GO:0044444//cytoplasmic part	GO:0005515//protein binding;GO:0019212//phosphatase inhibitor activity;GO:0019888//protein phosphatase regulator activity	GO:0000087//mitotic M phase;GO:0006259//DNA metabolic process;GO:0006355//regulation of transcription, DNA-templated;GO:0016482//cytoplasmic transport;GO:0031057//negative regulation of histone modification;GO:0034728//nucleosome organization;GO:0043066//negative regulation of apoptotic process
ncbi_111060342	GO:0015630//microtubule cytoskeleton;GO:0043005//neuron projection;GO:0043234//protein complex;GO:0044297//cell body	GO:0015631//tubulin binding	GO:0001654//eye development;GO:0008306//associative learning;GO:0010970//establishment of localization by movement along microtubule;GO:0043066//negative regulation of apoptotic process;GO:0045104//intermediate filament cytoskeleton organization;GO:0048638//regulation of developmental growth;GO:0048812//neuron projection morphogenesis;GO:0050808//synapse organization
ncbi_111060422	-	-	-
ncbi_111060486	-	-	-
ncbi_111060544	-	-	-
ncbi_111060553	-	-	-
ncbi_111060628	-	-	-
ncbi_111060684	-	-	-
ncbi_111060833	-	GO:0008092//cytoskeletal protein binding;GO:0044212//transcription regulatory region DNA binding	GO:0006936//muscle contraction;GO:0009755//hormone-mediated signaling pathway
ncbi_111060859	GO:0016020//membrane	GO:0015377//cation:chloride symporter activity	GO:0006821//chloride transport;GO:0030001//metal ion transport;GO:0044763//single-organism cellular process
ncbi_111060878	-	-	-
ncbi_111060998	-	-	-
ncbi_111061086	-	-	-
ncbi_111061101	GO:0043231//intracellular membrane-bounded organelle	-	GO:0007165//signal transduction
ncbi_111061119	GO:0005819//spindle	GO:0005488//binding;GO:0016772//transferase activity, transferring phosphorus-containing groups	GO:0006468//protein phosphorylation;GO:0007067//mitotic nuclear division;GO:0007346//regulation of mitotic cell cycle;GO:0031399//regulation of protein modification process;GO:0032270//positive regulation of cellular protein metabolic process;GO:0032434//regulation of proteasomal ubiquitin-dependent protein catabolic process;GO:0044772//mitotic cell cycle phase transition;GO:0051301//cell divisio…
ncbi_111061281	-	-	-
ncbi_111061318	-	-	-
ncbi_111061390	-	-	-
ncbi_111061470	-	-	-
ncbi_111061519	-	-	-
ncbi_111061525	-	-	-
ncbi_111061539	-	-	-
ncbi_111061661	-	-	-
ncbi_111061740	GO:0000785//chromatin;GO:0043189//H4/H2A histone acetyltransferase complex	GO:0003676//nucleic acid binding;GO:0046914//transition metal ion binding;GO:0046983//protein dimerization activity	GO:0006325//chromatin organization
ncbi_111061823	GO:0016020//membrane	-	-
ncbi_111061930	-	-	-
ncbi_111062000	-	-	-
ncbi_111062201	-	GO:0016740//transferase activity	GO:0008152//metabolic process;GO:0009987//cellular process;GO:0044699//single-organism process
ncbi_111062226	-	GO:0016713//oxidoreductase activity, acting on paired donors, with incorporation or reduction of molecular oxygen, reduced iron-sulfur protein as one donor, and incorporation of one atom of oxygen;GO:0046906//tetrapyrrole binding;GO:0046914//transition metal ion binding	GO:0008202//steroid metabolic process
ncbi_111062391	-	GO:0016491//oxidoreductase activity	-
ncbi_111062424	-	-	-
ncbi_111062487	-	-	-
ncbi_111062491	-	GO:0043169//cation binding	-
ncbi_111062512	-	-	-
ncbi_111062549	GO:0043005//neuron projection	-	GO:0006950//response to stress;GO:0007409//axonogenesis;GO:0044237//cellular metabolic process;GO:0071704//organic substance metabolic process
ncbi_111062619	GO:0016020//membrane;GO:0031970//organelle envelope lumen;GO:0043231//intracellular membrane-bounded organelle	GO:0016491//oxidoreductase activity	GO:0006222//UMP biosynthetic process
ncbi_111062625	GO:0000323//lytic vacuole;GO:0005768//endosome;GO:0030141//secretory granule;GO:0043234//protein complex	GO:0005488//binding	GO:0006810//transport;GO:0008104//protein localization;GO:0033363//secretory granule organization;GO:0051875//pigment granule localization;GO:0061024//membrane organization
ncbi_111062740	-	-	-
ncbi_111062818	-	GO:0016773//phosphotransferase activity, alcohol group as acceptor;GO:0032550//purine ribonucleoside binding	GO:0006090//pyruvate metabolic process;GO:0016310//phosphorylation;GO:0044238//primary metabolic process
ncbi_111062864	-	-	-
ncbi_111062893	-	-	-
ncbi_111062962	GO:0016020//membrane;GO:0045120//pronucleus;GO:0098687//chromosomal region	GO:0005488//binding	GO:0044707//single-multicellular organism process;GO:0044763//single-organism cellular process
ncbi_111063136	-	-	-
ncbi_111063151	GO:0000785//chromatin;GO:0043189//H4/H2A histone acetyltransferase complex	GO:0003676//nucleic acid binding;GO:0046914//transition metal ion binding;GO:0046983//protein dimerization activity	GO:0006325//chromatin organization
ncbi_111063158	-	-	-
ncbi_111063213	-	-	-
ncbi_111063243	-	-	-
ncbi_111063278	-	-	-
ncbi_111063320	-	GO:0016787//hydrolase activity	GO:0009987//cellular process;GO:0044238//primary metabolic process;GO:0044699//single-organism process;GO:0071704//organic substance metabolic process
ncbi_111063374	-	-	-
ncbi_111063394	-	GO:0004672//protein kinase activity	-
ncbi_111063609	-	-	-
ncbi_111063661	-	-	-
ncbi_111063742	GO:0044464//cell part	-	GO:0044765//single-organism transport
ncbi_111063835	-	-	-
ncbi_111063867	-	-	-
ncbi_111063876	-	-	-
ncbi_111063930	GO:0000785//chromatin;GO:0043189//H4/H2A histone acetyltransferase complex	GO:0003676//nucleic acid binding;GO:0046914//transition metal ion binding;GO:0046983//protein dimerization activity	GO:0006325//chromatin organization
ncbi_111064034	-	-	-
ncbi_111064125	-	-	-
ncbi_111064167	-	GO:0005254//chloride channel activity	GO:0042742//defense response to bacterium
ncbi_111064220	-	-	-
ncbi_111064223	GO:0044424//intracellular part	GO:0008238//exopeptidase activity	GO:0007420//brain development;GO:0019538//protein metabolic process
ncbi_111064224	-	-	-
ncbi_111064232	-	-	-
ncbi_111064319	-	-	-
ncbi_111064388	-	-	-
ncbi_111064393	GO:0031224//intrinsic component of membrane	GO:0016791//phosphatase activity;GO:0038023//signaling receptor activity	GO:0002385//mucosal immune response;GO:0006796//phosphate-containing compound metabolic process;GO:0006952//defense response;GO:0010559//regulation of glycoprotein biosynthetic process;GO:0048666//neuron development
ncbi_111064431	-	-	-
ncbi_111064450	-	-	-
ncbi_111064462	GO:0016020//membrane;GO:0016023//cytoplasmic, membrane-bounded vesicle	GO:0017016//Ras GTPase binding;GO:0043167//ion binding	GO:0001505//regulation of neurotransmitter levels;GO:0016192//vesicle-mediated transport;GO:0032940//secretion by cell
ncbi_111064535	GO:0031984//organelle subcompartment;GO:0043231//intracellular membrane-bounded organelle	GO:0008233//peptidase activity	GO:0007420//brain development;GO:0019538//protein metabolic process
ncbi_111064557	-	-	-
ncbi_111064604	-	-	-
ncbi_111064620	-	-	-
ncbi_120348717	-	-	-
ncbi_120348766	-	-	-
ncbi_120348821	GO:0043231//intracellular membrane-bounded organelle	GO:0005515//protein binding;GO:0016772//transferase activity, transferring phosphorus-containing groups;GO:0032550//purine ribonucleoside binding;GO:0060089//molecular transducer activity	GO:0006090//pyruvate metabolic process;GO:0006796//phosphate-containing compound metabolic process;GO:0010468//regulation of gene expression;GO:0034645//cellular macromolecule biosynthetic process;GO:0050794//regulation of cellular process
ncbi_120348871	-	-	-
ncbi_120348964	-	-	-
ncbi_120348998	-	-	-
ncbi_120349099	GO:0031224//intrinsic component of membrane	GO:0004713//protein tyrosine kinase activity;GO:0032550//purine ribonucleoside binding	GO:0006468//protein phosphorylation
ncbi_120349329	GO:0043227//membrane-bounded organelle	-	GO:0000302//response to reactive oxygen species;GO:0006801//superoxide metabolic process;GO:0007005//mitochondrion organization;GO:0008015//blood circulation;GO:0009628//response to abiotic stimulus;GO:0010033//response to organic substance;GO:0010038//response to metal ion;GO:0019222//regulation of metabolic process;GO:0030154//cell differentiation;GO:0034599//cellular response to oxidative stre…
ncbi_120349368	GO:0005768//endosome;GO:0005874//microtubule;GO:0031988//membrane-bounded vesicle;GO:0035770//ribonucleoprotein granule	GO:0005198//structural molecule activity;GO:0005515//protein binding;GO:0017111//nucleoside-triphosphatase activity;GO:0032550//purine ribonucleoside binding	GO:0043623//cellular protein complex assembly;GO:0044763//single-organism cellular process
ncbi_120349479	-	-	-
ncbi_120349779	GO:0016023//cytoplasmic, membrane-bounded vesicle;GO:0043005//neuron projection;GO:0044297//cell body	GO:0005515//protein binding;GO:0016831//carboxy-lyase activity;GO:0031406//carboxylic acid binding	GO:0007275//multicellular organism development;GO:0009404//toxin metabolic process;GO:0015837//amine transport;GO:0017085//response to insecticide;GO:0042417//dopamine metabolic process;GO:0042428//serotonin metabolic process;GO:0042493//response to drug;GO:0043279//response to alkaloid;GO:0048511//rhythmic process;GO:0070848//response to growth factor
ncbi_120349827	-	-	-
ncbi_120349858	-	-	-
ncbi_120349883	-	-	-
ncbi_120349890	-	-	-
ncbi_120350005	-	-	-
ncbi_120350011	-	-	-
ncbi_120350033	GO:0005739//mitochondrion	GO:0004812//aminoacyl-tRNA ligase activity	GO:0006418//tRNA aminoacylation for protein translation
ncbi_120350044	GO:0031224//intrinsic component of membrane	GO:0015081//sodium ion transmembrane transporter activity	GO:0006814//sodium ion transport;GO:0044763//single-organism cellular process
ncbi_120350085	GO:0031224//intrinsic component of membrane	GO:0005326//neurotransmitter transporter activity;GO:0022857//transmembrane transporter activity	GO:0044763//single-organism cellular process;GO:0044765//single-organism transport
ncbi_120350117	-	-	-
ncbi_120350258	-	-	-
ncbi_120350339	-	-	-
ncbi_120350475	-	-	-
ncbi_120350529	-	-	-
ncbi_120350579	-	-	-
ncbi_120350645	-	-	-
ncbi_120350792	-	-	-
ncbi_120350818	-	GO:0016740//transferase activity	-
ncbi_120350888	-	-	-
ncbi_120350939	-	-	-
ncbi_120350960	-	-	-
ncbi_120351067	GO:0043231//intracellular membrane-bounded organelle;GO:0043234//protein complex	GO:0005515//protein binding	GO:0006281//DNA repair
ncbi_120351110	-	-	-
ncbi_120351148	-	-	-
ncbi_120351193	-	-	-
ncbi_120351195	GO:0043234//protein complex	GO:0016740//transferase activity;GO:0016831//carboxy-lyase activity	GO:0006796//phosphate-containing compound metabolic process;GO:0044711//single-organism biosynthetic process;GO:0055086//nucleobase-containing small molecule metabolic process;GO:0072528//pyrimidine-containing compound biosynthetic process
ncbi_120351236	-	-	-
ncbi_120351267	-	-	-
ncbi_120351286	-	-	-
ncbi_120351287	-	-	-
ncbi_120351307	-	-	-
ncbi_120351384	-	-	-
ncbi_120351561	-	-	-
ncbi_120351573	GO:0000785//chromatin;GO:0031988//membrane-bounded vesicle;GO:0043231//intracellular membrane-bounded organelle	GO:0003723//RNA binding;GO:0046983//protein dimerization activity	GO:0006334//nucleosome assembly;GO:0045638//negative regulation of myeloid cell differentiation;GO:0051262//protein tetramerization
ncbi_120351712	-	-	GO:0010466//negative regulation of peptidase activity
ncbi_120351766	-	-	-
ncbi_120351873	-	-	-
ncbi_120352165	-	-	-
ncbi_120352180	-	GO:0016787//hydrolase activity;GO:0043167//ion binding	GO:0008152//metabolic process
ncbi_120352281	-	GO:0003723//RNA binding;GO:0016787//hydrolase activity	-
ncbi_120352282	-	-	-
ncbi_120352292	-	-	-
ncbi_120352554	GO:0000323//lytic vacuole	GO:0004175//endopeptidase activity	GO:0019538//protein metabolic process
ncbi_120352635	-	-	-
ncbi_120352733	-	-	-
ncbi_120352819	-	-	-
ncbi_120352871	-	GO:0016740//transferase activity	-
ncbi_120353060	-	-	-
ncbi_120353061	-	-	-
ncbi_120353153	-	-	-
ncbi_120353227	-	-	-
ncbi_120353229	-	-	-
ncbi_120353287	-	-	-
ncbi_120353303	-	-	-
ncbi_120353520	-	-	-
ncbi_120353609	-	-	-
ncbi_120353669	-	-	-
ncbi_120353693	-	-	-
ncbi_120353699	-	-	-
ncbi_120353783	-	-	-
ncbi_120353870	-	-	-
ncbi_120353965	-	-	-
ncbi_120354276	-	-	-
ncbi_120354358	-	-	-
ncbi_120354481	-	-	-
ncbi_120354629	-	-	-
ncbi_120354884	-	-	-
ncbi_120354917	-	-	-
ncbi_120355309	-	-	-
ncbi_120355310	GO:0005737//cytoplasm;GO:0043231//intracellular membrane-bounded organelle;GO:0043232//intracellular non-membrane-bounded organelle	-	-
ncbi_120355433	-	-	-
ncbi_120355481	-	-	-
ncbi_120355484	-	-	-
ncbi_120355487	GO:0044424//intracellular part	GO:0008238//exopeptidase activity	GO:0007420//brain development;GO:0019538//protein metabolic process
ncbi_120355505	-	-	-
ncbi_120355616	GO:0005868//cytoplasmic dynein complex;GO:0042995//cell projection	GO:0003774//motor activity;GO:0032550//purine ribonucleoside binding;GO:0046872//metal ion binding	GO:0007018//microtubule-based movement;GO:0048870//cell motility
ncbi_120355691	-	-	-
ncbi_120355703	-	-	-
ncbi_120355777	-	-	-
ncbi_120355882	GO:0000785//chromatin;GO:0043189//H4/H2A histone acetyltransferase complex	GO:0003676//nucleic acid binding;GO:0046914//transition metal ion binding;GO:0046983//protein dimerization activity	GO:0006325//chromatin organization
ncbi_120355946	-	-	GO:0042335//cuticle development
ncbi_120355961	-	-	-
ncbi_120355984	-	-	-
ncbi_120356101	GO:0031090//organelle membrane;GO:0043231//intracellular membrane-bounded organelle	GO:0005515//protein binding;GO:0008289//lipid binding;GO:0008395//steroid hydroxylase activity;GO:0016709//oxidoreductase activity, acting on paired donors, with incorporation or reduction of molecular oxygen, NAD(P)H as one donor, and incorporation of one atom of oxygen;GO:0033695//oxidoreductase activity, acting on CH or CH2 groups, quinone or similar compound as acceptor;GO:0046914//transition…	GO:0006721//terpenoid metabolic process;GO:0009820//alkaloid metabolic process;GO:0017144//drug metabolic process;GO:0042368//vitamin D biosynthetic process;GO:0042493//response to drug;GO:0055114//oxidation-reduction process
ncbi_120356146	GO:0005767//secondary lysosome;GO:0005775//vacuolar lumen;GO:0005776//autophagosome	GO:0019900//kinase binding	GO:0006914//autophagy;GO:0010259//multicellular organism aging;GO:0010623//developmental programmed cell death;GO:0031329//regulation of cellular catabolic process;GO:1903320//regulation of protein modification by small protein conjugation or removal
ncbi_120356148	-	-	-
ncbi_120356171	-	-	-
ncbi_120356176	GO:0031224//intrinsic component of membrane	-	GO:0044763//single-organism cellular process;GO:0051234//establishment of localization
ncbi_120356187	-	-	-
ncbi_120356231	-	-	-
ncbi_120356269	-	-	-
ncbi_120356309	GO:0044424//intracellular part	GO:0005515//protein binding	GO:0008152//metabolic process;GO:0050794//regulation of cellular process
ncbi_120356357	-	-	-
ncbi_120356369	-	-	-
ncbi_120356460	-	GO:0016765//transferase activity, transferring alkyl or aryl (other than methyl) groups	GO:0006596//polyamine biosynthetic process
ncbi_120356489	-	-	-
ncbi_120356505	-	-	-
ncbi_120356538	-	-	-
ncbi_120356547	GO:0031674//I band	GO:0019787//ubiquitin-like protein transferase activity;GO:0046914//transition metal ion binding	GO:0006936//muscle contraction;GO:0010927//cellular component assembly involved in morphogenesis;GO:0019725//cellular homeostasis;GO:0032446//protein modification by small protein conjugation;GO:0055002//striated muscle cell development
ncbi_120356566	-	-	-
ncbi_120356574	GO:0044424//intracellular part	GO:0005488//binding	-
ncbi_120356635	-	-	-
ncbi_120356705	-	-	-
