# Supplementary material for: Genome-wide identification of long non-coding (lncRNA) in Nilaparvata lugens’s adaptability to resistant rice
Source: PeerJ. 2022 Jul 25;10:e13587. doi: 10.7717/peerj.13587 (PMC9332332; doi:10.7717/peerj.13587)
Supplement: Supplemental Information 9 [file peerj-10-13587-s009.xlsx]

## Sheet: Sheet1
geneID	Gene_Description	KEGG_A_class	KEGG_B_class	Pathway	K_ID	GO Component	GO Function	GO Process
ncbi_111044214	dynein light chain 2, cytoplasmic-like [Nilaparvata lugens]	Human Diseases;Organismal Systems	Infectious diseases;Excretory system	ko05132//Salmonella infection;ko04962//Vasopressin-regulated water reabsorption	K10418;K10418	GO:0005815//microtubule organizing center;GO:0015629//actin cytoskeleton;GO:0016020//membrane;GO:0030286//dynein complex;GO:0043231//intracellular membrane-bounded organelle;GO:0044441//ciliary part;GO:0044444//cytoplasmic part	GO:0005515//protein binding;GO:0016887//ATPase activity	GO:0002478//antigen processing and presentation of exogenous peptide antigen;GO:0007017//microtubule-based process;GO:0008038//neuron recognition;GO:0035556//intracellular signal transduction;GO:1900739//regulation of protein insertion into mitochondrial membrane involved in apoptotic signaling pathway
ncbi_111044232	beta-1,4-mannosyltransferase egh [Nilaparvata lugens]	Organismal Systems	Development	ko04320//Dorso-ventral axis formation	K02359	GO:0016021//integral component of membrane	GO:0000030//mannosyltransferase activity	GO:0001743//optic placode formation;GO:0002066//columnar/cuboidal epithelial cell development;GO:0007281//germ cell development;GO:0007619//courtship behavior;GO:0007621//negative regulation of female receptivity;GO:0016334//establishment or maintenance of polarity of follicular epithelium;GO:0043900//regulation of multi-organism process;GO:0044765//single-organism transport;GO:0051674//localizat…
ncbi_111044309	nemo-like protein [Nilaparvata lugens]	Environmental Information Processing;Environmental Information Processing;Environmental Information Processing;Cellular Processes	Signal transduction;Signal transduction;Signal transduction;Cellular community - eukaryotes	ko04010//MAPK signaling pathway;ko04310//Wnt signaling pathway;ko04068//FoxO signaling pathway;ko04520//Adherens junction	K04468;K04468;K04468;K04468	-	GO:0004702//receptor signaling protein serine/threonine kinase activity;GO:0032550//purine ribonucleoside binding	GO:0001738//morphogenesis of a polarized epithelium;GO:0003002//regionalization;GO:0006464//cellular protein modification process;GO:0006796//phosphate-containing compound metabolic process;GO:0008582//regulation of synaptic growth at neuromuscular junction;GO:0009629//response to gravity;GO:0009886//post-embryonic morphogenesis;GO:0009968//negative regulation of signal transduction;GO:0035114//i…
ncbi_111045247	ubiquitin-conjugating enzyme E2I-like [Acyrthosiphon pisum]	Human Diseases;Genetic Information Processing	Neurodegenerative diseases;Folding, sorting and degradation	ko05012//Parkinson disease;ko04120//Ubiquitin mediated proteolysis	K04552;K04552	GO:0031988//membrane-bounded vesicle;GO:0043231//intracellular membrane-bounded organelle	GO:0003712//transcription cofactor activity;GO:0003723//RNA binding;GO:0004842//ubiquitin-protein transferase activity;GO:0036094//small molecule binding;GO:0044389//ubiquitin-like protein ligase binding;GO:0055106//ubiquitin-protein transferase regulator activity	GO:0000209//protein polyubiquitination;GO:0010468//regulation of gene expression;GO:0010822//positive regulation of mitochondrion organization;GO:0019941//modification-dependent protein catabolic process;GO:0022402//cell cycle process;GO:0031398//positive regulation of protein ubiquitination;GO:0032870//cellular response to hormone stimulus;GO:0034645//cellular macromolecule biosynthetic process;…
ncbi_111045303	defensin-like [Nilaparvata lugens]	Organismal Systems	Immune system	ko04624//Toll and Imd signaling pathway	K20668	GO:0005576//extracellular region	-	GO:0006955//immune response;GO:0042742//defense response to bacterium
ncbi_111045417	serine/threonine-protein phosphatase alpha-2 isoform-like [Nilaparvata lugens]	Environmental Information Processing;Human Diseases;Human Diseases;Human Diseases;Cellular Processes;Organismal Systems;Cellular Processes;Environmental Information Processing;Cellular Processes;Organismal Systems;Organismal Systems;Cellular Processes;Organismal Systems;Environmental Information Processing;Organismal Systems;Genetic Information Processing;Organismal Systems;Human Diseases;Organis…	Signal transduction;Substance dependence;Infectious diseases;Cancers;Cell motility;Endocrine system;Cellular community - eukaryotes;Signal transduction;Cell growth and death;Endocrine system;Circulatory system;Cell growth and death;Circulatory system;Signal transduction;Nervous system;Translation;Sensory system;Endocrine and metabolic diseases;Immune system;Substance dependence;Nervous system	ko04024//cAMP signaling pathway;ko05034//Alcoholism;ko05168//Herpes simplex infection;ko05205//Proteoglycans in cancer;ko04810//Regulation of actin cytoskeleton;ko04910//Insulin signaling pathway;ko04510//Focal adhesion;ko04022//cGMP - PKG signaling pathway;ko04218//Cellular senescence;ko04921//Oxytocin signaling pathway;ko04270//Vascular smooth muscle contraction;ko04114//Oocyte meiosis;ko04261/…	K06269;K06269;K06269;K06269;K06269;K06269;K06269;K06269;K06269;K06269;K06269;K06269;K06269;K06269;K06269;K06269;K06269;K06269;K06269;K06269;K06269	GO:0000776//kinetochore;GO:0005924//cell-substrate adherens junction;GO:0008287//protein serine/threonine phosphatase complex;GO:0016604//nuclear body;GO:0031966//mitochondrial membrane;GO:0032155//cell division site part;GO:0035097//histone methyltransferase complex;GO:0044309//neuron spine	GO:0003723//RNA binding;GO:0004721//phosphoprotein phosphatase activity;GO:0019900//kinase binding;GO:0043169//cation binding	GO:0000087//mitotic M phase;GO:0000278//mitotic cell cycle;GO:0006073//cellular glucan metabolic process;GO:0006464//cellular protein modification process;GO:0006641//triglyceride metabolic process;GO:0006796//phosphate-containing compound metabolic process;GO:0006913//nucleocytoplasmic transport;GO:0007623//circadian rhythm;GO:0009648//photoperiodism;GO:0017015//regulation of transforming growth…
ncbi_111045476	cadherin EGF LAG seven-pass G-type receptor 1-like [Nilaparvata lugens]	-	-	-	-	GO:0005578//proteinaceous extracellular matrix	-	GO:0007166//cell surface receptor signaling pathway
ncbi_111045698	cAMP-dependent protein kinase catalytic subunit-like [Cimex lectularius]	Human Diseases;Organismal Systems;Human Diseases;Environmental Information Processing;Environmental Information Processing;Human Diseases;Human Diseases;Human Diseases;Human Diseases;Cellular Processes;Human Diseases;Human Diseases;Environmental Information Processing;Human Diseases;Environmental Information Processing;Environmental Information Processing;Organismal Systems;Organismal Systems;Org…	Cancers;Environmental adaptation;Infectious diseases;Signal transduction;Signal transduction;Substance dependence;Cancers;Neurodegenerative diseases;Infectious diseases;Transport and catabolism;Cancers;Infectious diseases;Signal transduction;Endocrine and metabolic diseases;Signal transduction;Signal transduction;Endocrine system;Nervous system;Development and regeneration;Endocrine system;Cellul…	ko05200//Pathways in cancer;ko04714//Thermogenesis;ko05165//Human papillomavirus infection;ko04024//cAMP signaling pathway;ko04010//MAPK signaling pathway;ko05034//Alcoholism;ko05203//Viral carcinogenesis;ko05012//Parkinson disease;ko05166//HTLV-I infection;ko04140//Autophagy - animal;ko05205//Proteoglycans in cancer;ko05163//Human cytomegalovirus infection;ko04014//Ras signaling pathway;ko04934/…	K04345;K04345;K04345;K04345;K04345;K04345;K04345;K04345;K04345;K04345;K04345;K04345;K04345;K04345;K04345;K04345;K04345;K04345;K04345;K04345;K04345;K04345;K04345;K04345;K04345;K04345;K04345;K04345;K04345;K04345;K04345;K04345;K04345;K04345;K04345;K04345;K04345;K04345;K04345;K04345;K04345;K04345;K04345;K04345;K04345;K04345;K04345;K04345;K04345;K04345;K04345;K04345;K04345;K04345;K04345;K04345;K04345;…	GO:0005815//microtubule organizing center;GO:0031981//nuclear lumen;GO:0031988//membrane-bounded vesicle;GO:0044441//ciliary part;GO:0044444//cytoplasmic part	GO:0004690//cyclic nucleotide-dependent protein kinase activity;GO:0032550//purine ribonucleoside binding;GO:0044389//ubiquitin-like protein ligase binding;GO:0046872//metal ion binding	GO:0002220//innate immune response activating cell surface receptor signaling pathway;GO:0003014//renal system process;GO:0006006//glucose metabolic process;GO:0006641//triglyceride metabolic process;GO:0007187//G-protein coupled receptor signaling pathway, coupled to cyclic nucleotide second messenger;GO:0007267//cell-cell signaling;GO:0007599//hemostasis;GO:0010646//regulation of cell communica…
ncbi_111046415	muscarinic acetylcholine receptor DM1-like [Nilaparvata lugens]	Human Diseases;Environmental Information Processing;Organismal Systems;Environmental Information Processing;Cellular Processes;Organismal Systems;Organismal Systems;Organismal Systems;Organismal Systems;Organismal Systems	Neurodegenerative diseases;Signaling molecules and interaction;Digestive system;Signal transduction;Cell motility;Nervous system;Digestive system;Endocrine system;Digestive system;Sensory system	ko05010//Alzheimer disease;ko04080//Neuroactive ligand-receptor interaction;ko04972//Pancreatic secretion;ko04020//Calcium signaling pathway;ko04810//Regulation of actin cytoskeleton;ko04725//Cholinergic synapse;ko04970//Salivary secretion;ko04911//Insulin secretion;ko04971//Gastric acid secretion;ko04742//Taste transduction	K04131;K04131;K04131;K04131;K04131;K04131;K04131;K04131;K04131;K04131	GO:0016021//integral component of membrane	GO:0004930//G-protein coupled receptor activity	GO:0007186//G-protein coupled receptor signaling pathway;GO:0044267//cellular protein metabolic process
ncbi_111046604	voltage-dependent anion-selective channel-like [Nilaparvata lugens]	Human Diseases;Human Diseases;Human Diseases;Human Diseases;Environmental Information Processing;Environmental Information Processing;Cellular Processes;Cellular Processes;Organismal Systems;Organismal Systems;Cellular Processes	Neurodegenerative diseases;Neurodegenerative diseases;Neurodegenerative diseases;Infectious diseases;Signal transduction;Signal transduction;Cell growth and death;Cell growth and death;Immune system;Digestive system;Cell growth and death	ko05016//Huntington disease;ko05010//Alzheimer disease;ko05012//Parkinson disease;ko05166//HTLV-I infection;ko04020//Calcium signaling pathway;ko04022//cGMP - PKG signaling pathway;ko04218//Cellular senescence;ko04217//Necroptosis;ko04621//NOD-like receptor signaling pathway;ko04979//Cholesterol metabolism;ko04216//Ferroptosis	K15040;K15040;K15040;K15040;K15040;K15040;K15040;K15040;K15040;K15040;K15040	GO:0016020//membrane;GO:0043232//intracellular non-membrane-bounded organelle;GO:0043234//protein complex;GO:0044429//mitochondrial part	GO:0005216//ion channel activity;GO:0005515//protein binding	GO:0006820//anion transport;GO:0007005//mitochondrion organization;GO:0007154//cell communication;GO:0032502//developmental process;GO:0044700//single organism signaling;GO:0050794//regulation of cellular process;GO:0050896//response to stimulus;GO:0055085//transmembrane transport
ncbi_111047276	chemosensory protein [Nilaparvata lugens]	-	-	-	-	-	-	GO:0019098//reproductive behavior;GO:0051707//response to other organism
ncbi_111047340	ADP-ribosylation factor-like protein 2-binding protein isoform X2 [Nilaparvata lugens]	-	-	-	-	GO:0005815//microtubule organizing center;GO:0042995//cell projection;GO:0043231//intracellular membrane-bounded organelle	-	GO:0042516//regulation of tyrosine phosphorylation of Stat3 protein;GO:0072595//maintenance of protein localization in organelle;GO:2001141//regulation of RNA biosynthetic process
ncbi_111047800	mitochondrial uncoupling protein 2-like isoform X1 [Nilaparvata lugens]	-	-	-	-	GO:0019866//organelle inner membrane;GO:0043231//intracellular membrane-bounded organelle	GO:0005488//binding	GO:0001101//response to acid chemical;GO:0001678//cellular glucose homeostasis;GO:0001889//liver development;GO:0006818//hydrogen transport;GO:0009267//cellular response to starvation;GO:0009746//response to hexose;GO:0022900//electron transport chain;GO:0032845//negative regulation of homeostatic process;GO:0032868//response to insulin;GO:0042391//regulation of membrane potential;GO:0042981//reg…
ncbi_111048296	serine/threonine-protein kinase minibrain [Nilaparvata lugens]	-	-	-	-	GO:0033267//axon part	GO:0004672//protein kinase activity;GO:0032550//purine ribonucleoside binding	GO:0006468//protein phosphorylation;GO:0007417//central nervous system development;GO:0007631//feeding behavior;GO:0008306//associative learning;GO:0008582//regulation of synaptic growth at neuromuscular junction;GO:0009416//response to light stimulus;GO:0035330//regulation of hippo signaling;GO:0045807//positive regulation of endocytosis;GO:0048511//rhythmic process
ncbi_111048416	TLR4 interactor with leucine rich repeats isoform X1 [Nilaparvata lugens]	-	-	-	-	GO:0005924//cell-substrate adherens junction;GO:0016020//membrane;GO:0032991//macromolecular complex	GO:0005488//binding	GO:0030336//negative regulation of cell migration;GO:0035385//Roundabout signaling pathway
ncbi_111048726	nocturnin isoform X1 [Nilaparvata lugens]	-	-	-	-	GO:0043234//protein complex;GO:0044424//intracellular part	-	GO:0000956//nuclear-transcribed mRNA catabolic process;GO:0007626//locomotory behavior;GO:0009314//response to radiation
ncbi_111048799	glutaredoxin-3 [Nilaparvata lugens]	-	-	-	-	GO:0031988//membrane-bounded vesicle;GO:0044444//cytoplasmic part	GO:0003723//RNA binding;GO:0005515//protein binding	GO:0008016//regulation of heart contraction;GO:0009987//cellular process;GO:0010611//regulation of cardiac muscle hypertrophy;GO:0019538//protein metabolic process;GO:0055076//transition metal ion homeostasis
ncbi_111049383	tyrosine 3-monooxygenase [Nilaparvata lugens]	Metabolism;Human Diseases;Human Diseases;Organismal Systems;Human Diseases;Human Diseases;Organismal Systems;Metabolism;Metabolism	Global and overview maps;Substance dependence;Neurodegenerative diseases;Nervous system;Substance dependence;Substance dependence;Endocrine system;Metabolism of cofactors and vitamins;Amino acid metabolism	ko01100//Metabolic pathways;ko05034//Alcoholism;ko05012//Parkinson disease;ko04728//Dopaminergic synapse;ko05031//Amphetamine addiction;ko05030//Cocaine addiction;ko04917//Prolactin signaling pathway;ko00790//Folate biosynthesis;ko00350//Tyrosine metabolism	K00501;K00501;K00501;K00501;K00501;K00501;K00501;K00501;K00501	-	GO:0016714//oxidoreductase activity, acting on paired donors, with incorporation or reduction of molecular oxygen, reduced pteridine as one donor, and incorporation of one atom of oxygen;GO:0031406//carboxylic acid binding;GO:0046914//transition metal ion binding	GO:0006520//cellular amino acid metabolic process;GO:0006950//response to stress;GO:0007427//epithelial cell migration, open tracheal system;GO:0007444//imaginal disc development;GO:0007564//regulation of chitin-based cuticle tanning;GO:0007619//courtship behavior;GO:0007626//locomotory behavior;GO:0009266//response to temperature stimulus;GO:0042069//regulation of catecholamine metabolic process…
ncbi_111049563	elongation of very long chain fatty acids protein 7-like [Nilaparvata lugens]	Metabolism;Metabolism;Metabolism;Metabolism	Global and overview maps;Global and overview maps;Lipid metabolism;Lipid metabolism	ko01100//Metabolic pathways;ko01212//Fatty acid metabolism;ko01040//Biosynthesis of unsaturated fatty acids;ko00062//Fatty acid elongation	K10250;K10250;K10250;K10250	-	GO:0016740//transferase activity	GO:0006633//fatty acid biosynthetic process;GO:0030154//cell differentiation;GO:0035556//intracellular signal transduction
ncbi_111049689	histidine triad nucleotide-binding protein 1 [Nilaparvata lugens]	-	-	-	-	GO:0016020//membrane;GO:0031988//membrane-bounded vesicle;GO:0043231//intracellular membrane-bounded organelle	GO:0003824//catalytic activity	GO:0006195//purine nucleotide catabolic process;GO:0010468//regulation of gene expression;GO:0072331//signal transduction by p53 class mediator
ncbi_111050388	transferrin [Nilaparvata lugens]	-	-	-	-	-	-	GO:0044699//single-organism process;GO:0050896//response to stimulus
ncbi_111050813	peroxiredoxin 1-like [Nilaparvata lugens]	Cellular Processes;Human Diseases	Transport and catabolism;Infectious diseases	ko04146//Peroxisome;ko05146//Amoebiasis	K13279;K13279	GO:0043234//protein complex;GO:0044444//cytoplasmic part	GO:0004601//peroxidase activity	GO:0003006//developmental process involved in reproduction;GO:0010259//multicellular organism aging;GO:0016477//cell migration;GO:0019725//cellular homeostasis;GO:0022610//biological adhesion;GO:0033554//cellular response to stress;GO:0042743//hydrogen peroxide metabolic process;GO:0044710//single-organism metabolic process
ncbi_111051810	excitatory amino acid transporter-like [Nilaparvata lugens]	Human Diseases;Organismal Systems;Organismal Systems;Human Diseases	Neurodegenerative diseases;Nervous system;Nervous system;Neurodegenerative diseases	ko05016//Huntington disease;ko04721//Synaptic vesicle cycle;ko04724//Glutamatergic synapse;ko05014//Amyotrophic lateral sclerosis (ALS)	K05613;K05613;K05613;K05613	GO:0043005//neuron projection;GO:0044425//membrane part	GO:0005310//dicarboxylic acid transmembrane transporter activity;GO:0005343//organic acid:sodium symporter activity	GO:0009416//response to light stimulus;GO:0015813//L-glutamate transport;GO:0042221//response to chemical;GO:0043090//amino acid import;GO:0044763//single-organism cellular process;GO:0048731//system development
ncbi_111053035	cAMP-dependent protein kinase catalytic subunit-like [Nilaparvata lugens]	Human Diseases;Organismal Systems;Human Diseases;Environmental Information Processing;Environmental Information Processing;Human Diseases;Human Diseases;Human Diseases;Human Diseases;Cellular Processes;Human Diseases;Human Diseases;Environmental Information Processing;Human Diseases;Environmental Information Processing;Environmental Information Processing;Organismal Systems;Organismal Systems;Org…	Cancers;Environmental adaptation;Infectious diseases;Signal transduction;Signal transduction;Substance dependence;Cancers;Neurodegenerative diseases;Infectious diseases;Transport and catabolism;Cancers;Infectious diseases;Signal transduction;Endocrine and metabolic diseases;Signal transduction;Signal transduction;Endocrine system;Nervous system;Development and regeneration;Endocrine system;Cellul…	ko05200//Pathways in cancer;ko04714//Thermogenesis;ko05165//Human papillomavirus infection;ko04024//cAMP signaling pathway;ko04010//MAPK signaling pathway;ko05034//Alcoholism;ko05203//Viral carcinogenesis;ko05012//Parkinson disease;ko05166//HTLV-I infection;ko04140//Autophagy - animal;ko05205//Proteoglycans in cancer;ko05163//Human cytomegalovirus infection;ko04014//Ras signaling pathway;ko04934/…	K04345;K04345;K04345;K04345;K04345;K04345;K04345;K04345;K04345;K04345;K04345;K04345;K04345;K04345;K04345;K04345;K04345;K04345;K04345;K04345;K04345;K04345;K04345;K04345;K04345;K04345;K04345;K04345;K04345;K04345;K04345;K04345;K04345;K04345;K04345;K04345;K04345;K04345;K04345;K04345;K04345;K04345;K04345;K04345;K04345;K04345;K04345;K04345;K04345;K04345;K04345;K04345;K04345;K04345;K04345;K04345;K04345;…	GO:0016020//membrane;GO:0044424//intracellular part	GO:0004690//cyclic nucleotide-dependent protein kinase activity;GO:0032550//purine ribonucleoside binding	GO:0001654//eye development;GO:0006464//cellular protein modification process;GO:0006796//phosphate-containing compound metabolic process;GO:0006915//apoptotic process;GO:0007017//microtubule-based process;GO:0007268//synaptic transmission;GO:0007309//oocyte axis specification;GO:0007447//imaginal disc pattern formation;GO:0007613//memory;GO:0007626//locomotory behavior;GO:0008306//associative le…
ncbi_111053362	F-box DNA helicase 1-like [Nilaparvata lugens]	-	-	-	-	-	GO:0005488//binding	GO:0044238//primary metabolic process;GO:0044260//cellular macromolecule metabolic process;GO:0050794//regulation of cellular process;GO:0051716//cellular response to stimulus
ncbi_111054162	heat shock protein 68-like [Nilaparvata lugens]	Cellular Processes;Genetic Information Processing;Genetic Information Processing;Environmental Information Processing;Organismal Systems;Organismal Systems;Human Diseases;Human Diseases;Human Diseases;Organismal Systems	Transport and catabolism;Transcription;Folding, sorting and degradation;Signal transduction;Endocrine system;Aging;Infectious diseases;Infectious diseases;Infectious diseases;Immune system	ko04144//Endocytosis;ko03040//Spliceosome;ko04141//Protein processing in endoplasmic reticulum;ko04010//MAPK signaling pathway;ko04915//Estrogen signaling pathway;ko04213//Longevity regulating pathway - multiple species;ko05162//Measles;ko05145//Toxoplasmosis;ko05134//Legionellosis;ko04612//Antigen processing and presentation	K03283;K03283;K03283;K03283;K03283;K03283;K03283;K03283;K03283;K03283	GO:0043231//intracellular membrane-bounded organelle;GO:0043232//intracellular non-membrane-bounded organelle;GO:0043234//protein complex	GO:0005515//protein binding;GO:0032550//purine ribonucleoside binding	GO:0001101//response to acid chemical;GO:0006950//response to stress;GO:0010259//multicellular organism aging;GO:0030154//cell differentiation;GO:0044267//cellular protein metabolic process
ncbi_111054320	apolipoprotein D-like [Nilaparvata lugens]	-	-	-	-	GO:0031988//membrane-bounded vesicle;GO:0044421//extracellular region part;GO:0044444//cytoplasmic part	GO:0032934//sterol binding	GO:0001953//negative regulation of cell-matrix adhesion;GO:0006979//response to oxidative stress;GO:0008285//negative regulation of cell proliferation;GO:0009611//response to wounding;GO:0009968//negative regulation of signal transduction;GO:0019318//hexose metabolic process;GO:0032682//negative regulation of chemokine production;GO:0034443//negative regulation of lipoprotein oxidation;GO:0042306…
ncbi_111055048	serine/threonine-protein phosphatase alpha-3 isoform-like [Nilaparvata lugens]	Environmental Information Processing;Human Diseases;Human Diseases;Human Diseases;Cellular Processes;Organismal Systems;Cellular Processes;Environmental Information Processing;Cellular Processes;Organismal Systems;Organismal Systems;Cellular Processes;Organismal Systems;Environmental Information Processing;Organismal Systems;Genetic Information Processing;Organismal Systems;Human Diseases;Organis…	Signal transduction;Substance dependence;Infectious diseases;Cancers;Cell motility;Endocrine system;Cellular community - eukaryotes;Signal transduction;Cell growth and death;Endocrine system;Circulatory system;Cell growth and death;Circulatory system;Signal transduction;Nervous system;Translation;Sensory system;Endocrine and metabolic diseases;Immune system;Substance dependence;Nervous system	ko04024//cAMP signaling pathway;ko05034//Alcoholism;ko05168//Herpes simplex infection;ko05205//Proteoglycans in cancer;ko04810//Regulation of actin cytoskeleton;ko04910//Insulin signaling pathway;ko04510//Focal adhesion;ko04022//cGMP - PKG signaling pathway;ko04218//Cellular senescence;ko04921//Oxytocin signaling pathway;ko04270//Vascular smooth muscle contraction;ko04114//Oocyte meiosis;ko04261/…	K06269;K06269;K06269;K06269;K06269;K06269;K06269;K06269;K06269;K06269;K06269;K06269;K06269;K06269;K06269;K06269;K06269;K06269;K06269;K06269;K06269	GO:0000776//kinetochore;GO:0005924//cell-substrate adherens junction;GO:0008287//protein serine/threonine phosphatase complex;GO:0016604//nuclear body;GO:0031966//mitochondrial membrane;GO:0032155//cell division site part;GO:0035097//histone methyltransferase complex;GO:0044309//neuron spine	GO:0003723//RNA binding;GO:0004721//phosphoprotein phosphatase activity;GO:0019900//kinase binding;GO:0043169//cation binding	GO:0000087//mitotic M phase;GO:0000278//mitotic cell cycle;GO:0006073//cellular glucan metabolic process;GO:0006470//protein dephosphorylation;GO:0006641//triglyceride metabolic process;GO:0006913//nucleocytoplasmic transport;GO:0007623//circadian rhythm;GO:0009648//photoperiodism;GO:0017015//regulation of transforming growth factor beta receptor signaling pathway;GO:0030154//cell differentiation…
ncbi_111055257	large neutral amino acids transporter small subunit 1 [Nilaparvata lugens]	Environmental Information Processing;Human Diseases	Signal transduction;Cancers	ko04150//mTOR signaling pathway;ko05230//Central carbon metabolism in cancer	K13780;K13780	GO:0031988//membrane-bounded vesicle;GO:0043232//intracellular non-membrane-bounded organelle;GO:0044425//membrane part	GO:0003823//antigen binding;GO:0015171//amino acid transmembrane transporter activity	GO:0002376//immune system process;GO:0007599//hemostasis;GO:0009620//response to fungus;GO:0015820//leucine transport;GO:0019752//carboxylic acid metabolic process;GO:0044767//single-organism developmental process;GO:0055085//transmembrane transport
ncbi_111056297	4-coumarate--CoA ligase 1-like isoform X1 [Nilaparvata lugens]	Metabolism;Metabolism	Global and overview maps;Metabolism of cofactors and vitamins	ko01100//Metabolic pathways;ko00130//Ubiquinone and other terpenoid-quinone biosynthesis	K01904;K01904	-	-	GO:0006631//fatty acid metabolic process;GO:0006637//acyl-CoA metabolic process;GO:0006641//triglyceride metabolic process;GO:0009968//negative regulation of signal transduction
ncbi_111058481	dual oxidase maturation factor 1-like [Nilaparvata lugens]	-	-	-	-	GO:0044425//membrane part;GO:0044464//cell part	GO:0005488//binding	GO:0006950//response to stress;GO:0007613//memory;GO:0008104//protein localization;GO:0008306//associative learning
ncbi_111059404	heat shock protein 83 [Nilaparvata lugens]	Human Diseases;Genetic Information Processing;Human Diseases;Environmental Information Processing;Organismal Systems;Human Diseases;Cellular Processes;Organismal Systems;Organismal Systems;Human Diseases;Organismal Systems;Organismal Systems;Organismal Systems	Cancers;Folding, sorting and degradation;Infectious diseases;Signal transduction;Endocrine system;Cardiovascular diseases;Cell growth and death;Endocrine system;Immune system;Cancers;Immune system;Immune system;Immune system	ko05200//Pathways in cancer;ko04141//Protein processing in endoplasmic reticulum;ko05132//Salmonella infection;ko04151//PI3K-Akt signaling pathway;ko04915//Estrogen signaling pathway;ko05418//Fluid shear stress and atherosclerosis;ko04217//Necroptosis;ko04914//Progesterone-mediated oocyte maturation;ko04621//NOD-like receptor signaling pathway;ko05215//Prostate cancer;ko04612//Antigen processing …	K04079;K04079;K04079;K04079;K04079;K04079;K04079;K04079;K04079;K04079;K04079;K04079;K04079	GO:0005700//polytene chromosome;GO:0005815//microtubule organizing center;GO:0016020//membrane;GO:0044444//cytoplasmic part	GO:0005515//protein binding;GO:0016887//ATPase activity;GO:0032550//purine ribonucleoside binding	GO:0001752//compound eye photoreceptor fate commitment;GO:0007051//spindle organization;GO:0007169//transmembrane receptor protein tyrosine kinase signaling pathway;GO:0007316//pole plasm RNA localization;GO:0008283//cell proliferation;GO:0009409//response to cold;GO:0010528//regulation of transposition;GO:0022604//regulation of cell morphogenesis;GO:0030036//actin cytoskeleton organization;GO:00…
ncbi_111059739	PREDICTED: histone H2B.v2 [Polistes dominula]	-	-	-	-	-	GO:0031267//small GTPase binding;GO:0046983//protein dimerization activity	GO:0009967//positive regulation of signal transduction;GO:0042051//compound eye photoreceptor development;GO:0042058//regulation of epidermal growth factor receptor signaling pathway
ncbi_111060035	raf homolog serine/threonine-protein kinase phl-like [Nilaparvata lugens]	Human Diseases;Human Diseases;Environmental Information Processing;Environmental Information Processing;Human Diseases;Human Diseases;Environmental Information Processing;Environmental Information Processing;Human Diseases;Cellular Processes;Organismal Systems;Cellular Processes;Environmental Information Processing;Organismal Systems;Human Diseases;Organismal Systems;Environmental Information Pro…	Neurodegenerative diseases;Cancers;Signal transduction;Signal transduction;Substance dependence;Cancers;Signal transduction;Signal transduction;Endocrine and metabolic diseases;Cell motility;Endocrine system;Cellular community - eukaryotes;Signal transduction;Circulatory system;Cancers;Immune system;Signal transduction;Nervous system;Endocrine system;Infectious diseases;Cell growth and death;Endo…	ko05010//Alzheimer disease;ko05200//Pathways in cancer;ko04024//cAMP signaling pathway;ko04010//MAPK signaling pathway;ko05034//Alcoholism;ko05205//Proteoglycans in cancer;ko04150//mTOR signaling pathway;ko04013//MAPK signaling pathway - fly;ko04934//Cushing syndrome;ko04810//Regulation of actin cytoskeleton;ko04910//Insulin signaling pathway;ko04510//Focal adhesion;ko04015//Rap1 signaling pathwa…	K04365;K04365;K04365;K04365;K04365;K04365;K04365;K04365;K04365;K04365;K04365;K04365;K04365;K04365;K04365;K04365;K04365;K04365;K04365;K04365;K04365;K04365;K04365;K04365;K04365;K04365;K04365;K04365;K04365;K04365;K04365;K04365;K04365;K04365;K04365;K04365;K04365;K04365;K04365;K04365;K04365;K04365;K04365;K04365;K04365	-	GO:0004672//protein kinase activity;GO:0043167//ion binding	GO:0006468//protein phosphorylation;GO:0007165//signal transduction
ncbi_111060231	E3 ubiquitin-protein ligase rnf168-like [Nilaparvata lugens]	-	-	-	-	GO:0043229//intracellular organelle	GO:0003824//catalytic activity;GO:0043130//ubiquitin binding	GO:0000209//protein polyubiquitination;GO:0006281//DNA repair;GO:0019219//regulation of nucleobase-containing compound metabolic process;GO:0033522//histone H2A ubiquitination;GO:0060255//regulation of macromolecule metabolic process
ncbi_111060833	myophilin [Nilaparvata lugens]	-	-	-	-	-	GO:0008092//cytoskeletal protein binding;GO:0044212//transcription regulatory region DNA binding	GO:0006936//muscle contraction;GO:0009755//hormone-mediated signaling pathway
ncbi_111061101	G kinase-anchoring protein 1-like [Nilaparvata lugens]	-	-	-	-	GO:0043231//intracellular membrane-bounded organelle	-	GO:0007165//signal transduction
ncbi_111062549	cyclin-dependent kinase 5 activator 1 [Nilaparvata lugens]	Human Diseases;Human Diseases	Neurodegenerative diseases;Substance dependence	ko05010//Alzheimer disease;ko05030//Cocaine addiction	K11716;K11716	GO:0043005//neuron projection	-	GO:0006950//response to stress;GO:0007409//axonogenesis;GO:0044237//cellular metabolic process;GO:0071704//organic substance metabolic process
ncbi_111064167	anoctamin-1-like isoform X1 [Nilaparvata lugens]	-	-	-	-	-	GO:0005254//chloride channel activity	GO:0042742//defense response to bacterium
ncbi_111064393	toll-like receptor Tollo [Nilaparvata lugens]	-	-	-	-	GO:0031224//intrinsic component of membrane	GO:0016791//phosphatase activity;GO:0038023//signaling receptor activity	GO:0002385//mucosal immune response;GO:0006796//phosphate-containing compound metabolic process;GO:0006952//defense response;GO:0010559//regulation of glycoprotein biosynthetic process;GO:0048666//neuron development
ncbi_120349329	superoxide dismutase [Mn], mitochondrial isoform X2 [Myripristis murdjan]	Human Diseases;Environmental Information Processing;Cellular Processes;Organismal Systems;Organismal Systems;Environmental Information Processing;Organismal Systems	Neurodegenerative diseases;Signal transduction;Transport and catabolism;Aging;Aging;Signal transduction;Aging	ko05016//Huntington disease;ko04013//MAPK signaling pathway - fly;ko04146//Peroxisome;ko04212//Longevity regulating pathway - worm;ko04213//Longevity regulating pathway - multiple species;ko04068//FoxO signaling pathway;ko04211//Longevity regulating pathway - mammal	K04564;K04564;K04564;K04564;K04564;K04564;K04564	GO:0043227//membrane-bounded organelle	-	GO:0000302//response to reactive oxygen species;GO:0006801//superoxide metabolic process;GO:0007005//mitochondrion organization;GO:0008015//blood circulation;GO:0009628//response to abiotic stimulus;GO:0010033//response to organic substance;GO:0010038//response to metal ion;GO:0019222//regulation of metabolic process;GO:0030154//cell differentiation;GO:0034599//cellular response to oxidative stre…
ncbi_120349779	tyrosine decarboxylase-like isoform X4 [Nilaparvata lugens]	Metabolism;Metabolism	Global and overview maps;Amino acid metabolism	ko01100//Metabolic pathways;ko00350//Tyrosine metabolism	K22329;K22329	GO:0016023//cytoplasmic, membrane-bounded vesicle;GO:0043005//neuron projection;GO:0044297//cell body	GO:0005515//protein binding;GO:0016831//carboxy-lyase activity;GO:0031406//carboxylic acid binding	GO:0007275//multicellular organism development;GO:0009404//toxin metabolic process;GO:0015837//amine transport;GO:0017085//response to insecticide;GO:0042417//dopamine metabolic process;GO:0042428//serotonin metabolic process;GO:0042493//response to drug;GO:0043279//response to alkaloid;GO:0048511//rhythmic process;GO:0070848//response to growth factor
ncbi_120351067	BRISC and BRCA1-A complex member 2-like [Nilaparvata lugens]	Genetic Information Processing	Replication and repair	ko03440//Homologous recombination	K12173	GO:0043231//intracellular membrane-bounded organelle;GO:0043234//protein complex	GO:0005515//protein binding	GO:0006281//DNA repair
ncbi_120356101	cytochrome P450 CYP6ER1 variant vF [Nilaparvata lugens]	-	-	-	-	GO:0031090//organelle membrane;GO:0043231//intracellular membrane-bounded organelle	GO:0005515//protein binding;GO:0008289//lipid binding;GO:0008395//steroid hydroxylase activity;GO:0016709//oxidoreductase activity, acting on paired donors, with incorporation or reduction of molecular oxygen, NAD(P)H as one donor, and incorporation of one atom of oxygen;GO:0033695//oxidoreductase activity, acting on CH or CH2 groups, quinone or similar compound as acceptor;GO:0046914//transition…	GO:0006721//terpenoid metabolic process;GO:0009820//alkaloid metabolic process;GO:0017144//drug metabolic process;GO:0042368//vitamin D biosynthetic process;GO:0042493//response to drug;GO:0055114//oxidation-reduction process
