# Supplementary material for: Genome-wide identification of long non-coding (lncRNA) in Nilaparvata lugens’s adaptability to resistant rice
Source: PeerJ. 2022 Jul 25;10:e13587. doi: 10.7717/peerj.13587 (PMC9332332; doi:10.7717/peerj.13587)
Supplement: Supplemental Information 11 — CT values and relative expression [file peerj-10-13587-s011.xlsx]

## Sheet:  Ct values
	TN1			TN2			TN3			YHY15			YHY2			YHY3
NlRPS11	16.507	16.8135	16.8307	17.0593	16.7064	16.9108	16.2933	16.3691	16.4982	13.5492	13.3891	13.7542	16.2504	16.4375	16.1137	15.7795	15.6217	15.3464
ncbi_111058532	20.1811	20.5284	20.1777	22.5477	22.3924	22.1982	21.1222	20.981	21.283	20.6675	20.6564	20.4111	22.9926	23.0562	22.686	20.2309	20.3805	20.1171
ncbi_111044590	19.8797	19.5077	19.7509	22.3717	22.2119	22.5817	19.2067	19.3324	19.2105	19.673	19.5603	19.4283	23.2215	23.3687	23.1282	19.8987	19.9145	19.5024
ncbi_111050469	21.3881	21.2635	21.2156	23.3565	23.224	23.0011	21.9986	22.319	22.3878	19.9551	20.3932	20.044	22.8788	22.49	22.6445	21.2767	21.5312	21.6111
ncbi_111044383	22.6226	22.2174	22.5923	25.3724	25.1545	25.2549	23.3874	22.9637	23.1567	22.3554	22.2528	22.5889	26.3907	26.5675	26.4112	22.7666	22.827	22.5001
ncbi_111053346	23.821	23.8273	23.7364	25.3866	25.4993	25.3905	24.2723	24.5049	24.2857	20.6251	20.4721	20.9394	21.1085	21.5522	21.4554	21.6962	21.5639	21.4694
ncbi_120355484	18.9341	18.6179	18.756	20.3292	20.3128	20.4701	19.223	19.5179	19.0331	19.6817	19.3966	19.6664	21.8687	21.9475	21.7806	18.8743	18.4733	18.7958
ncbi_111053362	30.763	30.7538	30.7723	30.7447	31.0457	30.8952	28.3825	28.4723	28.492	21.5852	21.8837	21.6451	24.6131	24.2341	24.3907	24.3898	24.3076	24.6935
ncbi_120355505	26.2613	25.9722	26.2917	27.0463	26.7616	27.1424	27.475	27.3126	27.6971	21.4788	21.0094	21.057	25.7373	25.5246	25.6983	24.4027	24.6519	24.3765
ncbi_111061470	19.0197	19.5006	19.4346	19.5165	19.669	19.7565	19.7904	19.6186	19.9711	16.8755	17.3659	16.9884	18.775	19.1183	18.857	18.099	18.4214	18.5418
MSTRG.26218	23.2866	23.1876	23.0496	24.0721	23.8214	23.8972	25.0813	25.0638	25.549	18.0108	17.8554	17.8097	23.4702	23.2291	22.997	23.7666	23.4995	23.5484

## Sheet: Relative expression
	TN1-1			TN1-2			TN1-3			YHY15-1			YHY15-2			YHY15-3
ncbi_111058532	1.90336	1.85026	2.38769	0.541182	0.471923	0.622101	0.854787	0.993539	0.881356	0.174859	0.157711	0.240758	0.226945	0.247236	0.255296	1.1105	0.89739	0.890012
ncbi_111044590	1.33086	2.12999	1.821	0.34689	0.30345	0.270575	1.82958	1.76751	2.10328	0.19768	0.191296	0.269974	0.109868	0.112951	0.106615	0.793194	0.703277	0.773246
ncbi_111050469	1.61657	2.17961	2.28006	0.605736	0.519935	0.699161	0.912968	0.770618	0.803478	0.561789	0.371134	0.608862	0.481475	0.717727	0.51521	1.05471	0.792483	0.619553
ncbi_111044383	1.80854	2.96206	2.31142	0.394281	0.359069	0.385906	0.917793	1.29751	1.2413	0.280144	0.269201	0.274661	0.111109	0.111912	0.0996441	0.988456	0.849751	0.880691
ncbi_111053346	1.45959	1.79725	1.93695	0.723057	0.523618	0.650604	0.920514	0.825729	1.05116	1.72142	1.71309	1.59582	8.00794	6.7033	5.72691	3.84438	3.77712	3.33216
ncbi_120355484	1.29556	1.99491	1.83435	0.722337	0.572061	0.591056	0.914398	0.785588	1.20225	0.0993123	0.108308	0.115695	0.141836	0.152898	0.137135	0.815521	0.965265	0.637825
ncbi_111053362	0.541253	0.673671	0.673033	0.803824	0.510886	0.653387	2.4302	2.40685	2.59639	40.3447	29.3595	44.6121	32.1694	47.6297	34.1383	27.0957	25.7121	16.2595
ncbi_120355505	1.38022	2.08554	1.69129	1.1745	1.12031	0.991371	0.513123	0.605249	0.507027	4.88872	6.05818	7.54892	1.66114	2.19163	1.55234	3.02275	2.27978	2.27983
ncbi_111061470	1.32713	1.176	1.2458	1.37914	0.971523	1.05358	0.670748	0.796317	0.682112	0.755058	0.481029	0.804833	1.31617	1.18111	1.13104	1.51727	1.0877	0.826759
MSTRG.26218	1.58798	2.10331	2.34202	1.35084	1.25849	1.37584	0.394655	0.42102	0.328942	7.91818	7.89251	10.4915	1.17033	1.57478	1.47771	0.687564	0.741703	0.592423
