# Supplementary material for: Genome-wide identification of long non-coding (lncRNA) in Nilaparvata lugens’s adaptability to resistant rice
Source: PeerJ. 2022 Jul 25;10:e13587. doi: 10.7717/peerj.13587 (PMC9332332; doi:10.7717/peerj.13587)
Supplement: Supplemental Information 12 — CT values and relative expression [file peerj-10-13587-s012.xlsx]

## Sheet:  Ct values
	TN1			TN2			TN3			YHY15			YHY2			YHY3
NlRPS11	16.507	16.8135	16.8307	17.0593	16.7064	16.9108	16.2933	16.3691	16.4982	13.5492	13.3891	13.7542	16.2504	16.4375	16.1137	15.7795	15.6217	15.3464
MSTRG.7685.2	32.3584	32.7819	32.4256	31.9176	31.626	31.7488	31.2655	31.2239	31.4166	36.7437	36.5474	36.7371	31.2017	31.2393	31.5431	39.4669	39.4076	39.0146
MSTRG.12888.1	20.5909	20.1084	20.1395	22.5841	22.619	22.5859	21.5631	21.119	21.2249	20.0441	19.9162	19.7794	22.3651	22.1448	22.3878	20.6832	20.892	20.4639
MSTRG.18697.1	18.2767	18.408	18.3596	18.5029	18.1757	18.4137	17.3641	16.9267	16.9746	18.2602	18.3461	18.32	19.0205	18.8762	18.9203	17.8512	17.8426	18.1688
MSTRG.26118.1	24.367	24.3687	24.7198	25.8101	25.8349	25.9179	25.5407	25.5363	25.5189	21.9909	22.2974	22.132	22.6356	22.7194	22.5809	23.128	23.3295	22.9417
MSTRG.26118.2	25.7954	25.7689	25.0351	26.4065	26.1559	26.0582	25.9625	25.7534	26.0641	22.1905	22.291	22.2508	22.3922	22.8768	22.444	23.3528	22.9533	22.9827
MSTRG.26199.1	30.1632	30.1091	30.0865	32.2801	32.7033	32.5134	32.2924	32.0524	32.4732	30.5094	30.3361	30.3654	30.5802	30.7549	30.6899	33.1554	33.0922	32.9513
MSTRG.26220.1	24.167	23.9061	23.9865	23.1933	23.0346	23.4509	21.756	21.5863	21.6111	18.4188	18.1867	18.6113	23.8374	23.9216	23.5537	23.6491	23.6541	24.0544
XR_005571984.1	26.3666	26.551	26.1192	29.3059	29.3648	28.9496	28.0693	27.8764	28.0932	26.3591	26.1376	26.414	28.1255	28.0114	28.4528	26.3942	26.0182	26.3382
XR_005573531.1	21.6334	21.6929	21.577	22.4984	22.7232	22.7163	21.9977	21.5072	21.5051	21.906	21.4778	21.6276	24.7476	24.8106	24.8274	20.6913	20.8011	20.5193
XR_005573932.1	23.5824	23.5883	23.1333	22.5659	22.9525	22.7808	21.1769	21.2148	21.5163	20.2533	19.9093	19.8354	22.6094	22.8728	22.4291	20.2219	20.5867	20.2087

## Sheet: Relative expression
	TN1-1			TN1-2			TN1-3			YHY15-1			YHY15-2			YHY15-3
MSTRG.7685.2	0.635495	0.586016	0.759122	1.26485	1.2123	1.2829	1.16887	1.26799	1.21323	0.0039138	0.00401362	0.00453224	1.18589	1.31542	0.851385	0.00278117	0.00259759	0.00281834
MSTRG.12888.1	1.56215	2.69911	2.67327	0.575373	0.439762	0.518456	0.686625	0.984514	1.00044	0.293708	0.287249	0.406735	0.38226	0.507025	0.342277	0.884927	0.686393	0.763052
MSTRG.18697.1	0.706394	0.797611	0.834678	0.885471	0.869896	0.849881	1.14658	1.63644	1.73116	0.091963	0.0775501	0.101701	0.353085	0.44427	0.344264	0.572968	0.516644	0.340507
MSTRG.26118.1	1.69953	2.09941	1.66553	0.916551	0.705455	0.767392	0.649645	0.686762	0.760142	1.13554	0.821805	1.18694	4.72372	5.07433	4.46259	2.42266	1.88856	2.04168
MSTRG.26118.2	0.956083	1.20431	2.02659	0.917839	0.855012	1.05418	0.734218	0.894519	0.788744	1.4972	1.24976	1.65504	8.46601	6.88883	7.42897	3.13883	3.71124	3.00456
MSTRG.26199.1	2.47747	3.1811	3.26974	0.837507	0.489081	0.642793	0.488331	0.607824	0.496558	0.250834	0.253154	0.319471	1.55314	1.56664	1.3093	0.18804	0.176103	0.160443
MSTRG.26220.1	0.389716	0.577494	0.552695	1.12223	0.980884	0.846934	1.78709	2.1187	2.27748	2.69603	2.83407	2.71933	0.409915	0.440214	0.453868	0.336987	0.301032	0.188466
XR_005571984.1	2.51447	2.7364	3.7352	0.480666	0.361327	0.555149	0.66605	0.802421	0.755088	0.325294	0.339455	0.360952	0.621853	0.766266	0.450831	1.48976	1.73294	1.14707
XR_005573531.1	1.14215	1.35544	1.4864	0.919529	0.616114	0.713351	0.765049	1.13284	1.24071	0.12169	0.146549	0.170123	0.110404	0.120329	0.0950218	1.32529	1.10093	1.10589
XR_005573932.1	0.423529	0.521625	0.723602	1.25634	0.752507	0.976635	1.93485	1.98647	1.7627	0.547839	0.622328	0.843637	0.695838	0.660013	0.717186	2.62703	1.82881	1.9637
