# Supplementary material for: Genome-wide identification of long non-coding (lncRNA) in Nilaparvata lugens’s adaptability to resistant rice
Source: PeerJ. 2022 Jul 25;10:e13587. doi: 10.7717/peerj.13587 (PMC9332332; doi:10.7717/peerj.13587)
Supplement: Supplemental Information 13 [file peerj-10-13587-s013.xlsx]

## Sheet: Sheet1
	RNA-seq（FPKM）
	TN1-1	TN1-2	TN1-3	YHY15-1	YHY15-2	YHY15-3
ncbi_111058532	16.2	11.24	9.34	7.22	3.29	7.37
ncbi_111044590	9.7	16.62	20.63	8.73	5.92	7.06
ncbi_111050469	1.17	1.11	1.01	1.83	2.23	1.59
ncbi_111044383	4.97	1.65	2.04	0.85	1.36	1.68
ncbi_111053346	52.27	11.84	23.89	146.05	26.37	146.8
ncbi_120355484	8.27	6.05	7.44	2.04	1.4	4.29
ncbi_111053362	0.29	0	0.3	1.68	0.43	1.64
ncbi_120355505	0.13	0.1	0.07	0.58	0.12	0.62
ncbi_111061470	4.83	5.33	3.79	7.82	4.36	10.27
MSTRG.26218	0.81	0.22	0.51	2.37	0.45	1.85
MSTRG.7685.2	2.22	2	1.18	0.19	0.23	0.77
MSTRG.12888.1	3.26	2.57	1.96	0.88	1.05	1.09
MSTRG.18697.1	12.55	9.22	19.47	2.48	2.09	9.16
MSTRG.26118.1	2.5	0.66	1.69	8.75	1.62	9.45
MSTRG.26118.2	2.09	0	2.41	13.45	0.74	13.21
MSTRG.26199.1	8.13	6.3	15.69	41.65	9.23	56.48
MSTRG.26220.1	0.72	0.31	0.63	1.34	0.76	1.45
XR_005571984.1	1	0.91	0.59	0.22	0.06	0.15
XR_005573531.1	3.49	2.56	1.7	0.14	0	0.61
XR_005573932.1	0.12	0.15	0.04	0.72	0.24	0.47
